# Supplementary material for: Niche Specialization and Functional Overlap of Bamboo Leaf and Root Microbiota
Source: Front Microbiol. 2020 Sep 18;11:571159. doi: 10.3389/fmicb.2020.571159 (PMC7531387; doi:10.3389/fmicb.2020.571159)
Supplement: TABLE S2 — OTUs generated in current study and their taxonomic assignment results. [file Table_2.XLSX]

## Sheet: 工作表1
Table S2 OTUs generated in current study and their taxonomic assignment results.
OTU	FBF	FBM	FCM	FDS	FHT	FIG	FMA	FOL	FPH	FPP	FSA	FSG	FSK	FST	FTO	RBF	RBM	RCM	RDS	RHT	RIG	RMA	ROL	RPH	RPP	RSA	RSG	RSK	RST	RTO	Assign
OTU1	3	0	0	0	0	0	0	0	0	0	0	0	0	0	0	0	0	0	0	1	0	0	0	0	0	0	0	0	0	0	k__Bacteria; p__Actinobacteria; c__Actinobacteria; o__unclassified_c__Actinobacteria; f__unclassified_c__Actinobacteria; g__unclassified_c__Actinobacteria; s__unclassified_c__Actinobacteria
OTU2	2	0	0	0	0	0	0	0	0	0	0	0	0	0	0	0	0	0	0	0	0	0	0	0	0	0	0	0	0	0	k__Bacteria; p__Proteobacteria; c__Deltaproteobacteria; o__Myxococcales; f__unclassified_o__Myxococcales; g__unclassified_o__Myxococcales; s__unclassified_o__Myxococcales
OTU3	13	0	0	0	0	0	0	0	0	0	0	0	0	0	0	0	0	0	0	0	0	0	0	0	0	0	0	0	0	0	k__Bacteria; p__Deinococcus-Thermus; c__Deinococci; o__Deinococcales; f__Deinococcaceae; g__Deinococcus; s__uncultured_bacterium_g__Deinococcus
OTU4	6418	0	1	0	0	8	0	0	0	0	0	63	0	0	0	0	0	0	0	0	0	0	0	0	0	0	0	0	0	0	k__Bacteria; p__Bacteroidetes; c__Bacteroidia; o__Flavobacteriales; f__Blattabacteriaceae; g__Candidatus_Uzinura; s__unclassified_g__Candidatus_Uzinura
OTU5	2	0	0	0	0	0	0	0	0	0	0	0	0	0	0	0	0	0	0	0	0	0	0	0	0	0	0	0	0	0	k__Bacteria; p__FBP; c__norank_p__FBP; o__norank_p__FBP; f__norank_p__FBP; g__norank_p__FBP; s__uncultured_bacterium_g__norank_p__FBP
OTU6	0	0	0	0	0	0	0	0	0	0	0	0	0	0	0	0	0	0	0	0	0	0	0	0	0	0	5	0	0	0	k__Bacteria; p__Bacteroidetes; c__Bacteroidia; o__Flavobacteriales; f__Weeksellaceae; g__Moheibacter; s__unclassified_g__Moheibacter
OTU7	2	0	0	0	0	0	0	0	0	0	0	0	0	0	0	3	0	0	0	0	0	0	0	0	0	0	0	0	0	1	k__Bacteria; p__Actinobacteria; c__Actinobacteria; o__Micromonosporales; f__Micromonosporaceae; g__Actinocatenispora; s__Actinocatenispora_sera
OTU9	0	5	0	0	0	0	0	0	0	0	0	0	0	0	0	0	0	0	0	0	0	0	0	0	0	0	0	0	0	0	k__Bacteria; p__Proteobacteria; c__Alphaproteobacteria; o__Rhizobiales; f__Methylopilaceae; g__norank_f__Methylopilaceae; s__Hansschlegelia_sp._CHL1
OTU10	0	2	5	0	0	0	0	0	6	0	0	2	0	0	0	0	0	0	0	0	0	0	0	0	0	0	0	0	0	0	k__Bacteria; p__Actinobacteria; c__Actinobacteria; o__Solirubrobacterales; f__67-14; g__norank_f__67-14; s__Solirubrobacterales_bacterium_67-14
OTU11	2	12	22	2	0	0	0	0	0	0	0	0	0	0	0	0	0	0	2	7	0	0	0	2	2	0	3	0	0	0	k__Bacteria; p__Actinobacteria; c__Actinobacteria; o__Micrococcales; f__Micrococcaceae; g__unclassified_f__Micrococcaceae; s__unclassified_f__Micrococcaceae
OTU12	0	13	0	0	0	0	0	0	0	0	0	0	0	0	0	0	0	0	0	0	0	0	0	0	0	0	0	0	0	0	k__Bacteria; p__Firmicutes; c__Bacilli; o__Lactobacillales; f__Lactobacillaceae; g__Lactobacillus; s__unclassified_g__Lactobacillus
OTU13	0	4	0	0	0	0	0	0	0	0	0	0	0	0	0	0	0	0	0	0	0	0	0	0	0	0	0	0	0	0	k__Bacteria; p__Firmicutes; c__Bacilli; o__Lactobacillales; f__Lactobacillaceae; g__Lactobacillus; s__Lactobacillus_manihotivorans
OTU14	0	2	0	0	0	0	0	0	0	0	0	0	0	0	0	0	0	2	0	0	0	0	0	0	0	0	0	0	0	0	k__Bacteria; p__Armatimonadetes; c__Fimbriimonadia; o__Fimbriimonadales; f__Fimbriimonadaceae; g__norank_f__Fimbriimonadaceae; s__metagenome_g__norank_f__Fimbriimonadaceae
OTU15	0	10	0	0	0	0	0	0	0	0	0	0	0	0	0	0	0	0	0	0	0	0	0	0	1	0	0	0	0	0	k__Bacteria; p__Actinobacteria; c__Actinobacteria; o__Corynebacteriales; f__Nocardiaceae; g__Rhodococcus; s__Rhodococcus_ruber
OTU16	0	2	0	0	0	0	0	0	0	0	0	0	0	0	0	0	0	0	1	0	0	0	0	0	0	0	0	0	0	0	k__Bacteria; p__Bacteroidetes; c__Bacteroidia; o__Sphingobacteriales; f__NS11-12_marine_group; g__norank_f__NS11-12_marine_group; s__metagenome_g__norank_f__NS11-12_marine_group
OTU17	0	2	0	0	0	0	0	0	0	0	0	0	0	0	0	0	0	0	0	0	0	0	0	0	0	0	0	0	0	0	k__Bacteria; p__Firmicutes; c__Clostridia; o__Clostridiales; f__Lachnospiraceae; g__Anaerocolumna; s__uncultured_bacterium_g__Anaerocolumna
OTU18	0	6	0	0	0	0	0	0	2	0	0	0	0	0	0	0	0	0	1	1	0	0	0	0	2	0	0	0	0	0	k__Bacteria; p__Actinobacteria; c__Actinobacteria; o__Microtrichales; f__unclassified_o__Microtrichales; g__unclassified_o__Microtrichales; s__unclassified_o__Microtrichales
OTU19	0	6	0	0	0	0	0	0	0	0	0	0	0	0	0	0	0	0	0	0	0	0	0	0	0	0	0	0	0	0	k__Bacteria; p__Proteobacteria; c__Alphaproteobacteria; o__Acetobacterales; f__Acetobacteraceae; g__Acetobacter; s__Acetobacter_papayae
OTU20	0	3	0	0	0	0	0	0	0	0	0	0	0	0	0	0	0	0	0	0	0	0	0	0	0	0	0	0	0	0	k__Bacteria; p__Chloroflexi; c__JG30-KF-CM66; o__norank_c__JG30-KF-CM66; f__norank_c__JG30-KF-CM66; g__norank_c__JG30-KF-CM66; s__unclassified_g__norank_c__JG30-KF-CM66
OTU21	0	22	0	4	0	0	0	0	0	0	0	0	2	0	0	0	0	0	0	0	0	0	0	0	2	0	0	0	0	0	k__Bacteria; p__Actinobacteria; c__Actinobacteria; o__Micrococcales; f__Microbacteriaceae; g__Agromyces; s__Agromyces_indicus
OTU22	0	3	0	0	0	0	0	0	0	0	0	0	0	0	0	0	0	0	0	0	0	0	0	0	0	0	0	0	0	0	k__Bacteria; p__Proteobacteria; c__Alphaproteobacteria; o__Acetobacterales; f__Acetobacteraceae; g__Acetobacter; s__Acetobacter_pasteurianus_g__Acetobacter
OTU23	2	12	0	0	0	2	0	0	0	0	0	1	0	0	0	0	0	0	2	0	0	0	0	1	10	0	0	0	2	0	k__Bacteria; p__Proteobacteria; c__Gammaproteobacteria; o__Xanthomonadales; f__Xanthomonadaceae; g__unclassified_f__Xanthomonadaceae; s__unclassified_f__Xanthomonadaceae
OTU24	0	16	0	0	0	0	0	0	0	0	0	0	1	0	0	0	0	0	0	0	0	0	0	0	1	0	0	0	1	9	k__Bacteria; p__Actinobacteria; c__Actinobacteria; o__Solirubrobacterales; f__Solirubrobacteraceae; g__Conexibacter; s__Conexibacter_woesei
OTU25	0	3	0	0	0	0	0	0	0	0	0	0	0	0	0	0	0	0	0	0	0	0	0	0	6	0	0	0	1	1	k__Bacteria; p__Actinobacteria; c__Actinobacteria; o__Microtrichales; f__Iamiaceae; g__Iamia; s__uncultured_Acidimicrobiales_bacterium_g__Iamia
OTU26	1	3	0	0	0	0	0	0	0	0	0	0	0	0	0	0	0	0	2	0	0	0	6	0	0	0	0	0	0	0	k__Bacteria; p__Actinobacteria; c__Actinobacteria; o__Microtrichales; f__Iamiaceae; g__Iamia; s__metagenome_g__Iamia
OTU27	0	0	7	0	0	0	3	0	0	0	0	0	0	0	0	0	0	0	0	0	0	0	0	0	1	0	0	0	0	0	k__Bacteria; p__Acidobacteria; c__Acidobacteriia; o__Acidobacteriales; f__Acidobacteriaceae_Subgroup_1; g__unclassified_f__Acidobacteriaceae_Subgroup_1; s__unclassified_f__Acidobacteriaceae_Subgroup_1
OTU28	0	0	6	0	0	0	0	0	0	0	0	0	0	0	0	0	0	0	0	0	0	0	0	0	0	0	0	0	3	2	k__Bacteria; p__Firmicutes; c__Bacilli; o__Bacillales; f__Planococcaceae; g__Sporosarcina; s__uncultured_bacterium_g__Sporosarcina
OTU29	0	0	34	0	0	5	0	0	0	0	0	0	0	0	0	0	0	0	0	0	0	0	0	0	6	0	0	0	0	0	k__Bacteria; p__FBP; c__norank_p__FBP; o__norank_p__FBP; f__norank_p__FBP; g__norank_p__FBP; s__metagenome_g__norank_p__FBP
OTU30	2	0	12	0	0	0	0	0	25	0	0	0	0	0	0	0	0	0	61	4	0	0	0	1	3	0	3	0	0	0	k__Bacteria; p__Actinobacteria; c__Actinobacteria; o__Micrococcales; f__Dermabacteraceae; g__Brachybacterium; s__Brachybacterium_paraconglomeratum
OTU31	1	0	17	1	3	4	0	0	0	0	0	0	0	0	0	5	3	0	0	0	0	1	0	0	0	0	0	0	0	0	k__Bacteria; p__Actinobacteria; c__Actinobacteria; o__Corynebacteriales; f__Corynebacteriaceae; g__Lawsonella; s__uncultured_bacterium_g__Lawsonella
OTU32	0	0	5	0	0	0	0	0	2	0	0	0	0	0	0	0	0	0	0	0	0	1	0	0	0	0	0	2	0	0	k__Bacteria; p__Actinobacteria; c__Actinobacteria; o__Corynebacteriales; f__Nocardiaceae; g__Gordonia; s__Gordonia_terrae_g__Gordonia
OTU33	0	0	6	0	0	0	0	0	0	0	0	0	0	0	0	0	0	0	0	0	0	0	0	0	1	0	0	0	0	2	k__Bacteria; p__Actinobacteria; c__Actinobacteria; o__unclassified_c__Actinobacteria; f__unclassified_c__Actinobacteria; g__unclassified_c__Actinobacteria; s__unclassified_c__Actinobacteria
OTU34	0	0	1	0	0	1	0	0	0	0	0	0	0	0	1	0	0	0	0	0	0	0	1	0	0	0	3	0	0	0	k__Bacteria; p__Proteobacteria; c__Alphaproteobacteria; o__Rhizobiales; f__Stappiaceae; g__Pannonibacter; s__unclassified_g__Pannonibacter
OTU35	0	0	2	0	0	0	0	1	0	0	0	0	0	0	0	0	0	2	0	4	0	1	0	0	5	0	0	0	0	0	k__Bacteria; p__Proteobacteria; c__Alphaproteobacteria; o__Rhizobiales; f__Hyphomicrobiaceae; g__Hyphomicrobium; s__unclassified_g__Hyphomicrobium
OTU36	0	0	1	0	0	0	0	0	0	0	0	0	0	0	0	0	0	0	0	0	0	0	0	0	0	0	0	0	0	0	k__Bacteria; p__Actinobacteria; c__Actinobacteria; o__Corynebacteriales; f__Corynebacteriaceae; g__Corynebacterium_1; s__Corynebacterium_callunae_DSM_20147
OTU37	0	0	0	0	1	1	0	0	0	1	0	0	2	0	0	0	0	0	0	0	0	0	0	2	0	0	0	0	0	0	k__Bacteria; p__Proteobacteria; c__Gammaproteobacteria; o__Pseudomonadales; f__Moraxellaceae; g__Enhydrobacter; s__Enhydrobacter_aerosaccus_g__Enhydrobacter
OTU38	0	0	1	0	0	0	0	0	0	0	0	0	0	0	0	0	0	0	0	0	0	0	0	0	0	0	0	0	0	0	k__Bacteria; p__Deinococcus-Thermus; c__Deinococci; o__Deinococcales; f__Deinococcaceae; g__Deinococcus; s__Deinococcus_ficus
OTU39	2	0	12	2	0	6	9	0	0	0	0	0	20	1	0	1	0	0	1	2	0	0	0	4	1	0	0	0	0	0	k__Bacteria; p__Actinobacteria; c__Actinobacteria; o__Micrococcales; f__Micrococcaceae; g__Micrococcus; s__unclassified_g__Micrococcus
OTU40	0	0	0	0	0	0	0	1	0	0	0	0	0	0	0	0	2	0	2	0	0	0	1	0	1	0	0	0	0	0	k__Bacteria; p__Firmicutes; c__Bacilli; o__Lactobacillales; f__Streptococcaceae; g__Streptococcus; s__unclassified_g__Streptococcus
OTU41	0	0	4	0	15	2	14	0	0	0	0	0	0	0	4	6	0	0	0	2	0	0	0	0	1	0	0	0	0	2	k__Bacteria; p__Bacteroidetes; c__Bacteroidia; o__Flavobacteriales; f__Flavobacteriaceae; g__Flavobacterium; s__unclassified_g__Flavobacterium
OTU42	0	0	1	0	0	0	0	0	0	0	0	0	0	0	0	0	0	0	0	0	0	0	0	0	0	0	0	0	0	0	k__Bacteria; p__Acidobacteria; c__Subgroup_11; o__norank_c__Subgroup_11; f__norank_c__Subgroup_11; g__norank_c__Subgroup_11; s__uncultured_soil_bacterium_g__norank_c__Subgroup_11
OTU43	0	0	11	1	6	15	0	2	0	22	0	2	0	0	2	11	2	0	0	0	0	0	0	0	0	0	0	0	0	0	k__Bacteria; p__Bacteroidetes; c__Bacteroidia; o__Flavobacteriales; f__Weeksellaceae; g__Chryseobacterium; s__Chryseobacterium_koreense
OTU44	1	0	7	0	0	0	0	0	0	0	0	0	0	0	0	0	0	0	0	0	0	0	0	0	0	0	0	0	0	0	k__Bacteria; p__Actinobacteria; c__Actinobacteria; o__Microtrichales; f__norank_o__Microtrichales; g__norank_o__Microtrichales; s__metagenome_g__norank_o__Microtrichales
OTU45	0	0	3	0	0	0	0	0	0	0	0	0	0	0	0	0	0	0	0	0	0	0	0	0	0	0	0	0	0	0	k__Bacteria; p__Firmicutes; c__Clostridia; o__Clostridiales; f__Family_XI_o__Clostridiales; g__Anaerococcus; s__Anaerococcus_hydrogenalis
OTU46	0	2	3	0	2	0	0	0	2	0	0	0	3	0	6	0	0	0	1	25	0	0	1	1	24	0	2	0	1	0	k__Bacteria; p__Bacteroidetes; c__Bacteroidia; o__Flavobacteriales; f__Weeksellaceae; g__Chryseobacterium; s__uncultured_bacterium_g__Chryseobacterium
OTU47	13	2	53	1	5	19	0	0	41	0	0	0	4	0	0	0	0	0	31	21	3	0	0	15	37	0	8	0	8	1	k__Bacteria; p__Actinobacteria; c__Actinobacteria; o__Micrococcales; f__Micrococcaceae; g__Neomicrococcus; s__unclassified_g__Neomicrococcus
OTU48	0	0	2	0	0	0	0	0	0	0	0	0	0	0	0	0	0	0	0	0	0	0	0	0	0	0	0	0	0	0	k__Bacteria; p__Firmicutes; c__Clostridia; o__Clostridiales; f__Lachnospiraceae; g__Anaerocolumna; s__uncultured_bacterium_g__Anaerocolumna
OTU49	4	6	24	0	0	1	0	1	0	0	0	0	0	0	0	0	0	0	2	25	1	0	0	4	21	0	7	1	2	0	k__Bacteria; p__Bacteroidetes; c__Bacteroidia; o__Flavobacteriales; f__Weeksellaceae; g__Chryseobacterium; s__uncultured_Flavobacteriaceae_bacterium_g__Chryseobacterium
OTU50	0	0	1	0	0	0	0	0	0	0	0	0	0	0	0	0	0	0	0	0	0	0	0	0	0	0	0	0	0	0	k__Bacteria; p__Proteobacteria; c__Deltaproteobacteria; o__Myxococcales; f__Phaselicystidaceae; g__Phaselicystis; s__unclassified_g__Phaselicystis
OTU51	0	0	2	0	0	0	0	0	0	0	0	0	0	0	0	0	0	0	0	0	0	0	0	0	0	0	0	0	0	0	k__Bacteria; p__Bacteroidetes; c__Bacteroidia; o__Cytophagales; f__Spirosomaceae; g__Leadbetterella; s__uncultured_bacterium_g__Leadbetterella
OTU52	0	0	1	0	3	3	0	2	0	1	0	0	0	0	2	2	0	0	0	0	1	0	0	0	0	0	0	0	0	0	k__Bacteria; p__Proteobacteria; c__Alphaproteobacteria; o__Sphingomonadales; f__Sphingomonadaceae; g__Sphingomonas; s__Sphingomonas_echinoides
OTU53	0	0	6	0	0	0	0	0	0	0	0	0	0	0	0	0	0	0	0	0	0	0	0	0	0	0	0	0	0	0	k__Bacteria; p__Proteobacteria; c__Alphaproteobacteria; o__Rhodobacterales; f__Rhodobacteraceae; g__Paracoccus; s__uncultured_bacterium_g__Paracoccus
OTU54	0	0	0	0	0	0	0	0	0	0	0	0	0	0	0	0	0	0	0	0	0	0	0	0	0	0	0	0	0	2	k__Bacteria; p__Proteobacteria; c__Alphaproteobacteria; o__Sphingomonadales; f__Sphingomonadaceae; g__unclassified_f__Sphingomonadaceae; s__unclassified_f__Sphingomonadaceae
OTU55	0	0	2	0	0	0	0	0	0	0	0	0	0	0	0	0	0	0	0	0	0	0	0	0	0	0	0	0	0	0	k__Bacteria; p__Gemmatimonadetes; c__Gemmatimonadetes; o__Longimicrobiales; f__Longimicrobiaceae; g__norank_f__Longimicrobiaceae; s__unclassified_g__norank_f__Longimicrobiaceae
OTU56	0	0	8	0	0	0	0	0	0	0	0	0	0	0	0	0	0	0	0	0	0	0	0	0	0	0	0	0	0	0	k__Bacteria; p__Actinobacteria; c__Actinobacteria; o__unclassified_c__Actinobacteria; f__unclassified_c__Actinobacteria; g__unclassified_c__Actinobacteria; s__unclassified_c__Actinobacteria
OTU57	0	0	1	0	0	0	0	0	0	0	0	0	0	0	0	0	0	0	0	0	0	0	0	0	0	0	0	0	0	0	k__Bacteria; p__Proteobacteria; c__Alphaproteobacteria; o__Rhodobacterales; f__Rhodobacteraceae; g__Rubellimicrobium; s__uncultured_bacterium_g__Rubellimicrobium
OTU58	12	1	47	0	0	8	0	0	31	5	0	0	0	1	0	2	4	0	3	12	0	0	0	7	21	0	4	1	3	0	k__Bacteria; p__Actinobacteria; c__Actinobacteria; o__Micrococcales; f__Intrasporangiaceae; g__Janibacter; s__Janibacter_limosus
OTU59	6	15	5	6	10	1	0	0	31	5	0	5	33	4	0	0	0	9	33	2	1	0	0	0	3	0	0	0	0	14	k__Bacteria; p__Actinobacteria; c__Actinobacteria; o__Pseudonocardiales; f__Pseudonocardiaceae; g__Pseudonocardia; s__unclassified_g__Pseudonocardia
OTU60	0	0	15	0	0	0	0	0	0	0	0	0	0	0	0	0	0	0	0	0	0	0	0	0	0	0	0	0	0	0	k__Bacteria; p__Proteobacteria; c__Alphaproteobacteria; o__Rickettsiales; f__Anaplasmataceae; g__Wolbachia; s__unclassified_g__Wolbachia
OTU61	2	1	6	0	0	0	0	0	0	0	0	0	0	0	0	0	0	0	0	0	0	0	0	2	0	0	0	0	0	0	k__Bacteria; p__Proteobacteria; c__Alphaproteobacteria; o__Sphingomonadales; f__Sphingomonadaceae; g__Sphingomonas; s__unclassified_g__Sphingomonas
OTU62	0	0	5	0	0	0	0	0	0	0	0	0	0	0	0	0	0	0	0	0	0	0	0	0	0	0	0	0	0	0	k__Bacteria; p__Proteobacteria; c__Deltaproteobacteria; o__SAR324_cladeMarine_group_B; f__norank_o__SAR324_cladeMarine_group_B; g__norank_o__SAR324_cladeMarine_group_B; s__uncultured_bacterium_g__norank_o__SAR324_cladeMarine_group_B
OTU63	5	5	7	0	1	0	0	0	0	0	0	0	6	0	0	0	0	0	0	6	1	0	0	3	7	0	7	0	0	1	k__Bacteria; p__Proteobacteria; c__Alphaproteobacteria; o__Rhizobiales; f__Rhizobiaceae; g__Mesorhizobium; s__metagenome_g__Mesorhizobium
OTU64	0	0	0	2	0	0	0	0	8	0	0	0	0	0	0	0	0	0	0	0	0	0	0	0	0	0	0	0	0	0	k__Bacteria; p__Firmicutes; c__Bacilli; o__Bacillales; f__Paenibacillaceae; g__Paenibacillus; s__unclassified_g__Paenibacillus
OTU65	0	0	0	5	0	0	0	0	0	0	0	0	0	0	0	0	0	0	0	0	0	0	0	0	0	0	0	0	0	0	k__Bacteria; p__Firmicutes; c__Bacilli; o__Bacillales; f__Family_XII_o__Bacillales; g__Exiguobacterium; s__unclassified_g__Exiguobacterium
OTU66	0	2	0	1	0	0	0	0	1	0	0	1	0	0	0	0	0	0	0	0	0	5	0	0	0	0	0	0	0	0	k__Bacteria; p__Proteobacteria; c__Alphaproteobacteria; o__Acetobacterales; f__Acetobacteraceae; g__Kozakia; s__Kozakia_baliensis
OTU67	0	0	0	4	0	0	0	2	0	0	0	0	0	2	0	0	0	0	0	0	0	0	0	4	7	0	0	0	0	0	k__Bacteria; p__Proteobacteria; c__Alphaproteobacteria; o__Rhizobiales; f__Hyphomicrobiaceae; g__Hyphomicrobium; s__uncultured_Hyphomicrobium_sp._g__Hyphomicrobium
OTU68	0	13	0	12	0	4	0	0	4	0	0	0	0	0	0	0	0	0	0	5	0	0	0	0	3	0	0	0	0	0	k__Bacteria; p__Actinobacteria; c__Actinobacteria; o__Micrococcales; f__Cellulomonadaceae; g__Cellulomonas; s__Cellulomonas_hominis
OTU70	0	0	0	1	0	0	0	0	0	0	0	0	0	0	0	0	0	0	0	0	0	0	0	0	1	0	0	0	0	0	k__Bacteria; p__Actinobacteria; c__Actinobacteria; o__Gaiellales; f__norank_o__Gaiellales; g__norank_o__Gaiellales; s__uncultured_organism_g__norank_o__Gaiellales
OTU71	0	0	0	2	0	0	0	0	0	0	0	0	0	0	0	0	0	0	0	0	0	0	0	0	0	0	0	0	0	0	k__Bacteria; p__Gemmatimonadetes; c__Gemmatimonadetes; o__Gemmatimonadales; f__Gemmatimonadaceae; g__norank_f__Gemmatimonadaceae; s__unclassified_g__norank_f__Gemmatimonadaceae
OTU72	0	0	0	2	0	0	0	0	0	0	0	0	0	0	0	0	0	0	0	0	0	0	0	0	0	0	0	0	0	0	k__Bacteria; p__Proteobacteria; c__Deltaproteobacteria; o__Bdellovibrionales; f__Bdellovibrionaceae; g__Bdellovibrio; s__uncultured_bacterium_g__Bdellovibrio
OTU73	0	0	0	0	4	0	0	0	0	0	0	0	0	0	0	0	0	0	0	1	0	0	0	0	0	0	0	0	0	2	k__Bacteria; p__Proteobacteria; c__Alphaproteobacteria; o__Rhizobiales; f__Beijerinckiaceae; g__Pseudochelatococcus; s__uncultured_bacterium_g__Pseudochelatococcus
OTU74	0	0	0	1	4	0	0	1	1	0	3	0	0	0	0	0	1	1	0	0	0	0	0	0	0	0	0	0	1	0	k__Bacteria; p__Proteobacteria; c__Alphaproteobacteria; o__Sphingomonadales; f__Sphingomonadaceae; g__Blastomonas; s__uncultured_alpha_proteobacterium_g__Blastomonas
OTU75	0	0	0	0	4	0	0	0	0	0	0	0	0	0	0	2	0	0	1	0	0	1	0	0	0	0	0	0	0	0	k__Bacteria; p__Proteobacteria; c__Alphaproteobacteria; o__Rhodobacterales; f__Rhodobacteraceae; g__Rubellimicrobium; s__uncultured_bacterium_g__Rubellimicrobium
OTU76	0	0	0	0	9	0	0	0	0	0	0	0	0	0	0	0	0	0	0	0	0	0	0	0	0	0	0	0	0	0	k__Bacteria; p__Chlamydiae; c__Chlamydiae; o__Chlamydiales; f__Parachlamydiaceae; g__unclassified_f__Parachlamydiaceae; s__unclassified_f__Parachlamydiaceae
OTU77	1	0	0	0	1	0	0	0	0	0	0	0	0	0	0	0	0	0	0	0	0	0	0	0	0	0	0	0	0	0	k__Bacteria; p__unclassified_k__Bacteria; p__unclassified_k__Bacteria; p__unclassified_k__Bacteria; p__unclassified_k__Bacteria; p__unclassified_k__Bacteria; p__unclassified_k__Bacteria
OTU78	0	0	0	0	26	1	4	0	1	0	0	0	0	0	0	0	0	0	0	2	0	0	0	0	0	0	0	0	0	0	k__Bacteria; p__Proteobacteria; c__Alphaproteobacteria; o__Rhodobacterales; f__Rhodobacteraceae; g__Paracoccus; s__Paracoccus_sulfuroxidans
OTU79	0	0	0	0	1	2	0	1	0	1	0	1	1	0	1	0	0	0	0	0	0	0	0	0	0	0	0	0	0	0	k__Bacteria; p__Bacteroidetes; c__Bacteroidia; o__Sphingobacteriales; f__Sphingobacteriaceae; g__Pedobacter; s__uncultured_bacterium_g__Pedobacter
OTU80	1	2	1	0	1	0	3	5	0	0	2	0	0	1	1	1	0	0	0	1	0	0	0	0	0	0	0	0	0	0	k__Bacteria; p__Proteobacteria; c__Deltaproteobacteria; o__Bdellovibrionales; f__Bdellovibrionaceae; g__Bdellovibrio; s__unclassified_g__Bdellovibrio
OTU81	0	0	1	0	0	0	0	0	0	0	0	0	0	0	0	0	0	0	0	0	0	0	0	0	0	0	0	0	0	0	k__Bacteria; p__Cyanobacteria; c__Sericytochromatia; o__norank_c__Sericytochromatia; f__norank_c__Sericytochromatia; g__norank_c__Sericytochromatia; s__unclassified_g__norank_c__Sericytochromatia
OTU83	0	19	0	0	11	8	0	0	0	0	0	0	0	0	0	1	0	0	0	0	0	0	0	0	0	0	0	0	0	0	k__Bacteria; p__Bacteroidetes; c__Bacteroidia; o__Cytophagales; f__Cytophagaceae; g__Cytophaga; s__Cytophaga_hutchinsonii_ATCC_33406
OTU84	0	0	0	0	1	0	0	0	0	0	0	0	0	0	0	0	0	0	0	0	0	0	0	0	0	0	0	0	0	0	k__Bacteria; p__Spirochaetes; c__Spirochaetia; o__Spirochaetales; f__Spirochaetaceae; g__Treponema_2; s__Treponema_medium
OTU85	0	0	0	0	0	3	0	0	0	0	0	0	0	0	0	0	0	1	0	0	0	0	0	0	0	0	0	0	0	0	k__Bacteria; p__Actinobacteria; c__Actinobacteria; o__Micrococcales; f__Dermacoccaceae; g__Barrientosiimonas; s__unclassified_g__Barrientosiimonas
OTU86	4	3	1	0	0	2	0	0	0	0	0	1	1	0	0	0	0	0	2	0	0	1	2	0	2	0	4	0	1	0	k__Bacteria; p__Proteobacteria; c__Alphaproteobacteria; o__Caulobacterales; f__Caulobacteraceae; g__unclassified_f__Caulobacteraceae; s__unclassified_f__Caulobacteraceae
OTU87	0	2	0	0	0	2	0	2	2	0	0	0	0	0	0	0	0	0	0	0	0	0	0	0	0	0	0	0	0	0	k__Bacteria; p__Proteobacteria; c__Deltaproteobacteria; o__Bdellovibrionales; f__Bdellovibrionaceae; g__Bdellovibrio; s__uncultured_bacterium_g__Bdellovibrio
OTU88	0	0	7	0	6	13	0	5	0	5	0	3	3	1	0	1	3	1	0	0	0	0	0	1	1	0	3	0	1	0	k__Bacteria; p__Proteobacteria; c__Alphaproteobacteria; o__Rhodobacterales; f__Rhodobacteraceae; g__Paracoccus; s__unclassified_g__Paracoccus
OTU89	0	0	0	0	0	5	0	0	0	0	0	0	0	0	0	0	3	0	0	0	0	0	0	0	0	0	0	0	0	0	k__Bacteria; p__Proteobacteria; c__Alphaproteobacteria; o__Rhodobacterales; f__Rhodobacteraceae; g__Paracoccus; s__Paracoccus_marcusii
OTU90	0	0	0	0	0	6	0	0	0	0	0	0	0	0	0	0	0	0	0	0	0	0	0	0	0	0	0	0	0	0	k__Bacteria; p__Deinococcus-Thermus; c__Deinococci; o__Deinococcales; f__Deinococcaceae; g__Deinococcus; s__unclassified_g__Deinococcus
OTU92	0	0	7	0	6	1	1	7	2	0	0	0	3	1	2	4	8	0	0	3	0	6	0	0	0	0	0	1	0	0	k__Bacteria; p__Proteobacteria; c__Alphaproteobacteria; o__Rhizobiales; f__Beijerinckiaceae; g__Methylobacterium; s__Methylobacterium_adhaesivum_g__Methylobacterium
OTU93	0	2	3	0	11	5	1	4	1	2	4	1	1	0	3	3	2	1	0	0	0	0	0	0	0	0	0	0	1	0	k__Bacteria; p__Proteobacteria; c__Gammaproteobacteria; o__Pseudomonadales; f__Moraxellaceae; g__Acinetobacter; s__unclassified_g__Acinetobacter
OTU94	2	0	2	0	7	1	0	0	0	0	0	0	0	0	0	0	5	0	3	4	0	4	0	10	12	0	0	0	2	0	k__Bacteria; p__Actinobacteria; c__Actinobacteria; o__Corynebacteriales; f__Nocardiaceae; g__Rhodococcus; s__Rhodococcus_fascians
OTU95	0	0	0	0	0	2	0	0	0	0	0	0	0	0	0	0	0	0	0	1	0	0	0	0	0	0	1	0	0	0	k__Bacteria; p__Actinobacteria; c__Actinobacteria; o__Micrococcales; f__Intrasporangiaceae; g__unclassified_f__Intrasporangiaceae; s__unclassified_f__Intrasporangiaceae
OTU96	0	0	0	0	0	1	0	0	0	0	0	0	0	0	0	0	0	0	0	0	0	0	0	0	0	0	0	0	0	0	k__Bacteria; p__Firmicutes; c__Clostridia; o__Clostridiales; f__Clostridiaceae_1; g__Fonticella; s__uncultured_bacterium_g__Fonticella
OTU97	5	2	12	2	0	18	6	3	10	2	6	0	3	2	3	4	1	1	3	5	0	0	3	3	26	0	5	1	3	13	k__Bacteria; p__Proteobacteria; c__Alphaproteobacteria; o__Rhizobiales; f__Devosiaceae; g__Devosia; s__unclassified_g__Devosia
OTU98	0	0	0	0	0	6	0	0	0	0	0	0	0	0	0	0	0	0	0	0	0	0	0	0	0	0	0	0	0	0	k__Bacteria; p__Actinobacteria; c__Actinobacteria; o__Actinomycetales; f__Actinomycetaceae; g__Mobiluncus; s__Mobiluncus_curtisii
OTU99	0	0	0	0	0	6	0	0	0	0	0	0	0	0	0	0	0	0	0	0	0	0	0	0	0	0	2	0	0	0	k__Bacteria; p__Firmicutes; c__Clostridia; o__Clostridiales; f__Clostridiaceae_1; g__Clostridium_sensu_stricto_1; s__unclassified_g__Clostridium_sensu_stricto_1
OTU100	0	0	0	0	0	0	49	0	4	0	0	0	0	0	0	0	0	0	0	3	0	0	0	0	2	0	4	0	0	1	k__Bacteria; p__Actinobacteria; c__Actinobacteria; o__Streptomycetales; f__Streptomycetaceae; g__Streptomyces; s__unclassified_g__Streptomyces
OTU101	0	0	0	0	0	0	4	0	0	0	0	0	0	0	0	0	4	0	2	1	0	0	0	0	0	0	0	0	0	14	k__Bacteria; p__Actinobacteria; c__Actinobacteria; o__Streptosporangiales; f__Thermomonosporaceae; g__Actinomadura; s__metagenome_g__Actinomadura
OTU102	0	0	2	0	0	0	2	0	0	0	0	0	0	0	0	0	0	0	0	0	0	0	0	0	0	0	0	0	0	0	k__Bacteria; p__Proteobacteria; c__Alphaproteobacteria; o__Rhizobiales; f__Beijerinckiaceae; g__Methylobacterium; s__uncultured_bacterium_g__Methylobacterium
OTU103	0	0	0	0	0	0	1	0	0	0	0	0	0	0	0	0	0	0	0	0	0	0	0	0	0	0	0	0	0	0	k__Bacteria; p__Proteobacteria; c__Alphaproteobacteria; o__Acetobacterales; f__Acetobacteraceae; g__Acidiphilium; s__unclassified_g__Acidiphilium
OTU104	0	2	0	0	0	0	3	0	0	0	0	0	0	0	0	0	0	0	0	0	0	0	0	0	0	0	0	0	0	0	k__Bacteria; p__Actinobacteria; c__Actinobacteria; o__Microtrichales; f__Microtrichaceae; g__IMCC26207; s__unclassified_g__IMCC26207
OTU105	0	0	0	0	0	0	3	0	0	0	0	0	0	0	0	0	0	0	0	1	0	0	0	0	0	0	0	0	0	0	k__Bacteria; p__Proteobacteria; c__Deltaproteobacteria; o__Bdellovibrionales; f__Bacteriovoracaceae; g__Bacteriovorax; s__uncultured_bacterium_g__Bacteriovorax
OTU106	0	0	0	0	0	0	9	0	0	0	0	0	0	0	0	0	0	0	0	0	0	0	0	0	0	0	1	0	0	0	k__Bacteria; p__Actinobacteria; c__Actinobacteria; o__Propionibacteriales; f__Nocardioidaceae; g__Nocardioides; s__unclassified_g__Nocardioides
OTU107	0	0	0	0	0	0	5	0	0	0	0	0	0	0	0	0	0	0	0	0	0	0	0	0	0	0	0	0	0	0	k__Bacteria; p__Proteobacteria; c__Alphaproteobacteria; o__Acetobacterales; f__Acetobacteraceae; g__unclassified_f__Acetobacteraceae; s__unclassified_f__Acetobacteraceae
OTU108	0	0	0	0	0	0	4	0	0	0	0	0	0	0	0	0	0	0	0	0	0	0	0	0	0	0	0	0	0	0	k__Bacteria; p__Acidobacteria; c__Acidobacteriia; o__Solibacterales; f__Solibacteraceae_Subgroup_3; g__Bryobacter; s__metagenome_g__Bryobacter
OTU109	0	9	0	0	0	0	7	0	3	6	0	0	0	0	3	0	0	0	0	2	0	0	0	0	1	0	0	0	0	0	k__Bacteria; p__Proteobacteria; c__Alphaproteobacteria; o__Caulobacterales; f__Caulobacteraceae; g__Caulobacter; s__unclassified_g__Caulobacter
OTU110	0	0	0	0	0	0	2	0	0	0	0	0	0	0	0	0	0	0	0	0	0	0	0	0	0	0	0	0	0	0	k__Bacteria; p__Proteobacteria; c__Deltaproteobacteria; o__Myxococcales; f__BIrii41; g__norank_f__BIrii41; s__unclassified_g__norank_f__BIrii41
OTU111	0	0	0	0	0	0	3	0	0	0	0	0	0	0	0	0	0	0	0	0	0	0	0	0	0	0	0	0	0	0	k__Bacteria; p__Bacteroidetes; c__Bacteroidia; o__Flavobacteriales; f__Weeksellaceae; g__unclassified_f__Weeksellaceae; s__unclassified_f__Weeksellaceae
OTU112	0	0	0	0	0	0	3	0	0	0	0	0	0	0	0	0	0	0	0	0	0	0	0	0	0	0	0	0	0	0	k__Bacteria; p__Proteobacteria; c__Alphaproteobacteria; o__Rickettsiales; f__SM2D12; g__norank_f__SM2D12; s__unclassified_g__norank_f__SM2D12
OTU113	0	0	0	0	0	0	4	0	0	0	0	0	0	0	0	0	0	0	0	0	0	0	0	0	0	0	0	0	0	0	k__Bacteria; p__Firmicutes; c__Clostridia; o__Clostridiales; f__Family_XI_o__Clostridiales; g__Ezakiella; s__Bacteroides]_coagulans
OTU114	0	0	0	0	0	0	0	3	0	0	0	0	0	0	0	0	0	0	0	0	0	0	0	0	0	0	0	0	0	0	k__Bacteria; p__Proteobacteria; c__Gammaproteobacteria; o__Betaproteobacteriales; f__Rhodocyclaceae; g__Zoogloea; s__Zoogloea_resiniphila
OTU115	0	0	0	0	0	0	0	2	0	0	0	0	0	0	0	0	0	0	0	0	0	0	0	0	0	0	0	0	0	0	k__Bacteria; p__Proteobacteria; c__Alphaproteobacteria; o__Acetobacterales; f__Acetobacteraceae; g__Roseomonas; s__uncultured_bacterium_g__Roseomonas
OTU116	0	0	0	0	0	0	0	8	0	0	0	0	0	0	0	0	0	0	0	0	0	0	0	0	0	0	0	0	0	1	k__Bacteria; p__Proteobacteria; c__Gammaproteobacteria; o__Betaproteobacteriales; f__Nitrosomonadaceae; g__Ellin6067; s__unclassified_g__Ellin6067
OTU117	0	14	1	4	4	3	16	20	0	0	2	1	2	10	2	13	5	0	0	22	0	0	1	0	3	0	0	5	0	0	k__Bacteria; p__Proteobacteria; c__Gammaproteobacteria; o__Enterobacteriales; f__Enterobacteriaceae; g__Klebsiella; s__Klebsiella_aerogenes_g__Klebsiella
OTU118	0	0	0	0	0	0	0	5	0	0	0	0	0	0	0	0	0	0	0	0	0	0	0	0	0	0	0	0	0	0	k__Bacteria; p__Proteobacteria; c__Alphaproteobacteria; o__unclassified_c__Alphaproteobacteria; f__unclassified_c__Alphaproteobacteria; g__unclassified_c__Alphaproteobacteria; s__unclassified_c__Alphaproteobacteria
OTU119	0	0	0	0	0	0	0	1	0	0	0	0	0	0	0	0	0	0	0	0	0	0	0	0	0	0	0	0	0	0	k__Bacteria; p__Firmicutes; c__Bacilli; o__Lactobacillales; f__Streptococcaceae; g__Streptococcus; s__Streptococcus_cristatus_ATCC_51100
OTU120	0	0	0	0	0	0	0	4	0	0	0	0	0	0	0	0	0	0	0	0	0	0	0	0	0	0	0	0	0	0	k__Bacteria; p__Proteobacteria; c__Gammaproteobacteria; o__Pasteurellales; f__Pasteurellaceae; g__Haemophilus; s__unclassified_g__Haemophilus
OTU121	0	0	0	0	0	0	0	2	0	0	0	0	0	0	0	0	0	0	0	0	0	0	0	0	0	0	0	0	0	0	k__Bacteria; p__Proteobacteria; c__Gammaproteobacteria; o__Vibrionales; f__Vibrionaceae; g__Photobacterium; s__unclassified_g__Photobacterium
OTU122	0	0	0	0	0	0	0	4	0	0	0	0	0	0	0	0	0	0	0	0	0	0	0	0	0	0	0	0	0	0	k__Bacteria; p__Actinobacteria; c__Actinobacteria; o__Propionibacteriales; f__Nocardioidaceae; g__Nocardioides; s__unclassified_g__Nocardioides
OTU123	1	4	0	0	0	0	0	14	0	2	0	0	0	0	3	1	8	0	0	2	0	0	0	0	0	0	0	0	1	0	k__Bacteria; p__Proteobacteria; c__Alphaproteobacteria; o__Rhodobacterales; f__Rhodobacteraceae; g__Paracoccus; s__unclassified_g__Paracoccus
OTU125	0	1	0	3	0	4	0	3	0	2	0	0	0	0	0	0	0	0	0	1	0	0	0	0	0	0	0	0	0	0	k__Bacteria; p__Proteobacteria; c__Alphaproteobacteria; o__Rhizobiales; f__Rhizobiaceae; g__Allorhizobium-Neorhizobium-Pararhizobium-Rhizobium; s__Rhizobium_arenae
OTU126	2	716	5	3	4	19	0	0	13	0	0	0	70	3	0	0	0	10	280	10	0	1	1	0	139	0	4	9	96	10	k__Bacteria; p__Actinobacteria; c__Actinobacteria; o__Streptomycetales; f__Streptomycetaceae; g__Streptomyces; s__unclassified_g__Streptomyces
OTU127	0	0	0	0	0	0	0	0	24	0	0	0	0	0	0	0	0	0	0	0	0	0	0	0	0	0	0	0	0	0	k__Bacteria; p__Chloroflexi; c__Chloroflexia; o__Chloroflexales; f__Chloroflexaceae; g__Chloronema; s__Scytonema_tolypothrichoides_VB-61278_g__Chloronema
OTU128	0	0	0	0	0	0	0	0	4	0	0	0	0	0	0	0	0	0	0	0	0	0	0	0	0	0	0	0	0	0	k__Bacteria; p__Actinobacteria; c__Actinobacteria; o__Euzebyales; f__Euzebyaceae; g__Euzebya; s__uncultured_bacterium_g__Euzebya
OTU129	0	0	0	0	0	0	0	0	9	0	0	0	0	0	0	0	0	0	0	0	0	0	0	0	0	0	0	0	0	0	k__Bacteria; p__Proteobacteria; c__Deltaproteobacteria; o__Myxococcales; f__unclassified_o__Myxococcales; g__unclassified_o__Myxococcales; s__unclassified_o__Myxococcales
OTU131	0	0	0	0	0	0	0	0	9	0	0	0	0	0	0	0	0	0	0	0	0	0	0	0	0	0	0	0	0	0	k__Bacteria; p__Firmicutes; c__Clostridia; o__Clostridiales; f__Family_XI_o__Clostridiales; g__Parvimonas; s__uncultured_bacterium_g__Parvimonas
OTU132	0	2	0	0	0	0	0	0	153	5	0	0	0	2	0	0	0	0	0	1	0	1	0	0	0	0	0	1	0	1	k__Bacteria; p__Actinobacteria; c__Actinobacteria; o__Micrococcales; f__Microbacteriaceae; g__Microbacterium; s__Microbacterium_flavescens
OTU133	0	0	0	0	0	0	0	0	2	0	0	0	0	0	0	0	0	0	0	0	0	0	0	0	0	0	0	0	0	0	k__Bacteria; p__Proteobacteria; c__Alphaproteobacteria; o__Rhodobacterales; f__Rhodobacteraceae; g__Paracoccus; s__unclassified_g__Paracoccus
OTU134	0	0	0	0	0	0	0	0	2	0	0	0	0	0	0	0	0	0	0	0	0	0	0	0	0	0	0	0	0	0	k__Bacteria; p__Bacteroidetes; c__Bacteroidia; o__Bacteroidales; f__Bacteroidaceae; g__Bacteroides; s__Blattella_germanica_German_cockroach_g__Bacteroides
OTU135	0	0	3	0	0	3	3	0	7	0	0	0	0	0	0	0	0	0	0	3	0	2	0	0	6	0	5	0	0	0	k__Bacteria; p__Firmicutes; c__Bacilli; o__Lactobacillales; f__Aerococcaceae; g__Aerococcus; s__uncultured_bacterium_g__Aerococcus
OTU136	12	5	111	27	21	19	35	14	62	19	49	44	31	3	17	36	25	9	1	4	2	0	7	3	3	0	21	0	0	0	k__Bacteria; p__Proteobacteria; c__Deltaproteobacteria; o__Bdellovibrionales; f__Bacteriovoracaceae; g__Peredibacter; s__Bacteriovorax_sp._EPC3
OTU137	0	0	0	0	0	0	0	0	7	1	0	0	0	0	0	0	0	0	0	0	0	0	0	0	0	0	0	0	0	0	k__Bacteria; p__Actinobacteria; c__Actinobacteria; o__Corynebacteriales; f__Corynebacteriaceae; g__Corynebacterium_1; s__unclassified_g__Corynebacterium_1
OTU138	0	0	0	0	0	1	0	0	573	0	0	0	0	0	0	0	9	2	0	2	0	0	0	0	0	0	0	0	0	24	k__Bacteria; p__Actinobacteria; c__Actinobacteria; o__Frankiales; f__Geodermatophilaceae; g__Blastococcus; s__uncultured_bacterium_g__Blastococcus
OTU139	0	0	0	0	0	0	0	0	16	0	0	0	0	0	0	0	0	0	1	0	0	0	0	0	0	0	0	0	0	0	k__Bacteria; p__Actinobacteria; c__Actinobacteria; o__Propionibacteriales; f__Nocardioidaceae; g__Nocardioides; s__unclassified_g__Nocardioides
OTU140	0	0	2	0	0	0	0	0	6	0	0	0	0	0	0	0	0	0	1	0	0	0	0	1	1	0	0	0	0	0	k__Bacteria; p__Proteobacteria; c__Alphaproteobacteria; o__Rhizobiales; f__Devosiaceae; g__Pelagibacterium; s__uncultured_bacterium_g__Pelagibacterium
OTU141	0	0	0	0	0	0	0	0	5	0	0	0	0	0	0	0	0	0	0	0	0	0	0	0	0	0	0	0	0	0	k__Bacteria; p__Bacteroidetes; c__Bacteroidia; o__Flavobacteriales; f__Flavobacteriaceae; g__Flavobacterium; s__Flavobacterium_hauense
OTU142	0	0	0	0	0	0	0	0	101	0	0	0	0	0	0	0	3	0	0	0	0	0	0	0	1	0	0	0	0	0	k__Bacteria; p__Proteobacteria; c__Alphaproteobacteria; o__Tistrellales; f__Geminicoccaceae; g__Candidatus_Alysiosphaera; s__unclassified_g__Candidatus_Alysiosphaera
OTU143	2	0	13	6	0	2	0	0	4	0	0	0	0	2	0	0	2	0	0	1	0	0	1	0	2	0	2	0	0	0	k__Bacteria; p__Proteobacteria; c__Alphaproteobacteria; o__Rhizobiales; f__Rhizobiaceae; g__Mesorhizobium; s__unclassified_g__Mesorhizobium
OTU144	0	1	3	3	25	3	3	2	4	5	6	3	1	1	3	15	4	2	0	1	0	0	0	1	1	0	1	0	0	1	k__Bacteria; p__Proteobacteria; c__Gammaproteobacteria; o__Pseudomonadales; f__Moraxellaceae; g__Acinetobacter; s__Acinetobacter_lwoffii
OTU145	0	0	0	3	0	0	0	0	4	0	0	0	0	0	0	0	0	1	0	0	0	0	0	0	1	0	0	4	3	0	k__Bacteria; p__Proteobacteria; c__Alphaproteobacteria; o__Rhizobiales; f__Rhizobiaceae; g__Mesorhizobium; s__unclassified_g__Mesorhizobium
OTU146	0	0	0	0	0	0	0	0	3	0	0	0	0	0	0	0	0	0	0	0	0	0	0	0	0	0	0	0	0	0	k__Bacteria; p__Proteobacteria; c__Alphaproteobacteria; o__Rhizobiales; f__norank_o__Rhizobiales; g__norank_o__Rhizobiales; s__uncultured_bacterium_g__norank_o__Rhizobiales
OTU147	0	0	0	2	0	0	0	2	2	0	17	0	0	0	0	0	2	0	1	0	0	0	0	0	1	0	0	0	0	0	k__Bacteria; p__Proteobacteria; c__Alphaproteobacteria; o__Rhizobiales; f__Beijerinckiaceae; g__Methylobacterium; s__Methylobacterium_fujisawaense
OTU148	0	0	0	0	0	0	0	0	20	0	0	0	0	0	0	0	0	0	0	0	0	0	0	0	0	0	0	0	0	0	k__Bacteria; p__Proteobacteria; c__Alphaproteobacteria; o__Rickettsiales; f__Rickettsiaceae; g__Rickettsia; s__unclassified_g__Rickettsia
OTU149	0	0	0	0	0	0	0	0	4	0	0	0	0	0	0	0	0	0	0	0	0	0	0	0	0	0	0	0	0	0	k__Bacteria; p__unclassified_k__Bacteria; c__unclassified_k__norank_d__Bacteria; p__unclassified_k__Bacteria; p__unclassified_k__Bacteria; p__unclassified_k__Bacteria; p__unclassified_k__Bacteria
OTU150	2	17	18	32	38	37	30	9	33	19	15	12	21	7	31	17	19	15	8	17	1	0	40	6	2	0	20	1	4	0	k__Bacteria; p__Proteobacteria; c__Alphaproteobacteria; o__Rhizobiales; f__Rhizobiaceae; g__Allorhizobium-Neorhizobium-Pararhizobium-Rhizobium; s__unclassified_g__Allorhizobium-Neorhizobium-Pararhizobium-Rhizobium
OTU151	2	0	0	0	0	0	2	0	6	0	0	0	0	0	0	0	0	0	0	0	0	0	0	0	1	0	0	0	2	0	k__Bacteria; p__Actinobacteria; c__Actinobacteria; o__Solirubrobacterales; f__Solirubrobacteraceae; g__norank_f__Solirubrobacteraceae; s__uncultured_bacterium_g__norank_f__Solirubrobacteraceae
OTU152	2	4	4	15	6	5	2	2	10	3	3	1	15	0	13	3	8	3	1	5	0	0	3	0	0	0	23	0	0	0	k__Bacteria; p__Bacteroidetes; c__Bacteroidia; o__Flavobacteriales; f__Flavobacteriaceae; g__unclassified_f__Flavobacteriaceae; s__unclassified_f__Flavobacteriaceae
OTU153	0	0	0	0	6	0	0	0	0	0	0	0	0	0	0	0	0	0	0	0	0	0	1	0	0	0	0	0	0	0	k__Bacteria; p__Firmicutes; c__Bacilli; o__Bacillales; f__Bacillaceae; g__Fictibacillus; s__unclassified_g__Fictibacillus
OTU154	0	0	0	0	0	0	0	0	2	0	0	0	0	0	0	0	0	0	0	0	0	0	0	0	1	0	1	0	0	0	k__Bacteria; p__Actinobacteria; c__Actinobacteria; o__Micrococcales; f__Microbacteriaceae; g__Microbacterium; s__unclassified_g__Microbacterium
OTU155	0	0	0	0	0	0	0	0	11	0	0	0	0	0	0	0	0	0	0	0	0	0	0	0	0	0	0	0	0	0	k__Bacteria; p__Deinococcus-Thermus; c__Deinococci; o__Deinococcales; f__Deinococcaceae; g__Deinococcus; s__Deinococcus_yavapaiensis
OTU156	0	0	0	1	0	0	0	0	2	0	0	0	0	0	0	0	0	0	0	0	0	0	0	0	2	0	0	0	0	2	k__Bacteria; p__Proteobacteria; c__Alphaproteobacteria; o__Sphingomonadales; f__Sphingomonadaceae; g__Sphingomonas; s__uncultured_Sphingomonadaceae_bacterium_g__Sphingomonas
OTU157	0	0	0	0	0	0	0	0	1	0	0	0	0	0	0	0	0	0	0	0	0	0	0	0	0	0	0	0	0	0	k__Bacteria; p__Proteobacteria; c__Deltaproteobacteria; o__Myxococcales; f__Nannocystaceae; g__unclassified_f__Nannocystaceae; s__unclassified_f__Nannocystaceae
OTU158	0	2	0	3	0	5	1	0	1	5	0	0	2	0	11	0	1	0	0	0	1	0	0	0	1	0	0	0	0	1	k__Bacteria; p__Bacteroidetes; c__Bacteroidia; o__Flavobacteriales; f__Weeksellaceae; g__Elizabethkingia; s__unclassified_g__Elizabethkingia
OTU159	0	0	0	0	0	4	0	0	0	3	0	0	1	2	0	0	0	0	0	0	0	0	0	0	0	0	0	0	0	0	k__Bacteria; p__Actinobacteria; c__Actinobacteria; o__Microtrichales; f__Iamiaceae; g__Iamia; s__metagenome_g__Iamia
OTU160	0	0	0	0	0	0	0	0	11	19	0	0	0	0	0	0	0	0	0	0	0	0	0	0	0	0	0	0	0	0	k__Bacteria; p__Actinobacteria; c__Actinobacteria; o__Corynebacteriales; f__Corynebacteriaceae; g__Corynebacterium_1; s__Corynebacterium_sp._S18-03
OTU161	0	0	0	0	0	0	0	0	0	1	0	0	0	0	6	0	0	1	0	0	0	0	0	0	0	0	0	0	0	0	k__Bacteria; p__Proteobacteria; c__Alphaproteobacteria; o__Rickettsiales; f__SM2D12; g__norank_f__SM2D12; s__unidentified_marine_bacterioplankton_g__norank_f__SM2D12
OTU162	0	0	0	0	0	0	0	0	0	1	0	0	0	0	0	0	0	0	0	0	0	0	0	0	0	0	0	0	0	0	k__Bacteria; p__Proteobacteria; c__Alphaproteobacteria; o__Rhodobacterales; f__Rhodobacteraceae; g__unclassified_f__Rhodobacteraceae; s__unclassified_f__Rhodobacteraceae
OTU163	0	0	0	0	0	2	0	0	5	1	0	0	4	0	0	0	0	5	0	0	0	0	0	0	3	0	2	0	0	1	k__Bacteria; p__Proteobacteria; c__Deltaproteobacteria; o__Bdellovibrionales; f__Bdellovibrionaceae; g__Bdellovibrio; s__unclassified_g__Bdellovibrio
OTU164	0	0	0	0	0	0	0	0	0	22	0	0	0	0	0	0	0	0	0	0	0	0	0	0	0	0	0	0	0	0	k__Bacteria; p__Fusobacteria; c__Fusobacteriia; o__Fusobacteriales; f__Fusobacteriaceae; g__Fusobacterium; s__unclassified_g__Fusobacterium
OTU165	0	0	0	0	0	0	0	0	0	2	0	0	0	0	0	0	0	0	0	0	0	0	0	0	0	0	0	0	0	0	k__Bacteria; p__Proteobacteria; c__Deltaproteobacteria; o__Myxococcales; f__Phaselicystidaceae; g__Phaselicystis; s__uncultured_bacterium_g__Phaselicystis
OTU166	0	0	0	0	0	0	0	0	0	2	0	0	0	0	0	0	0	0	0	0	0	0	0	0	0	0	0	0	0	0	k__Bacteria; p__Firmicutes; c__Clostridia; o__Clostridiales; f__TC1; g__norank_f__TC1; s__uncultured_bacterium_g__norank_f__TC1
OTU167	0	0	0	0	0	0	0	0	0	0	1	0	0	0	0	0	0	0	0	0	0	1	0	0	0	0	0	0	0	0	k__Bacteria; p__Proteobacteria; c__Alphaproteobacteria; o__Sphingomonadales; f__Sphingomonadaceae; g__DSSF69; s__unclassified_g__DSSF69
OTU168	15	48	43	46	61	63	64	30	30	36	57	14	62	7	31	30	31	11	6	33	2	1	9	11	29	0	23	0	5	3	k__Bacteria; p__Proteobacteria; c__Alphaproteobacteria; o__Rhizobiales; f__Beijerinckiaceae; g__Bosea; s__unclassified_g__Bosea
OTU169	0	0	0	0	0	0	1	1	2	0	1	0	0	0	2	1	1	0	0	0	0	0	0	2	1	0	0	0	0	0	k__Bacteria; p__Proteobacteria; c__unclassified_p__Proteobacteria; o__unclassified_p__Proteobacteria; f__unclassified_p__Proteobacteria; g__unclassified_p__Proteobacteria; s__unclassified_p__Proteobacteria
OTU171	0	0	0	0	0	0	0	0	0	0	0	0	0	0	0	0	0	0	0	0	0	1	0	0	0	0	0	0	0	0	k__Bacteria; p__Proteobacteria; c__Alphaproteobacteria; o__Rhodobacterales; f__Rhodobacteraceae; g__norank_f__Rhodobacteraceae; s__uncultured_Amaricoccus_sp._g__norank
OTU172	0	0	0	0	0	0	0	0	0	0	9	0	0	0	0	0	0	0	0	0	0	0	0	0	0	0	0	0	0	0	k__Bacteria; p__Actinobacteria; c__Actinobacteria; o__Corynebacteriales; f__Corynebacteriaceae; g__Corynebacterium_1; s__Corynebacterium_glutamicum
OTU173	0	6	2	2	10	2	1	4	3	2	3	0	2	0	5	2	2	1	0	2	0	0	0	0	0	0	0	0	1	0	k__Bacteria; p__Bacteroidetes; c__Bacteroidia; o__Cytophagales; f__Spirosomaceae; g__Emticicia; s__unclassified_g__Emticicia
OTU174	2	0	0	0	0	0	0	0	0	0	0	3	0	0	0	0	0	0	0	0	0	0	0	0	0	0	0	0	0	0	k__Bacteria; p__Bacteroidetes; c__Bacteroidia; o__Flavobacteriales; f__Blattabacteriaceae; g__Candidatus_Uzinura; s__unclassified_g__Candidatus_Uzinura
OTU175	1	0	10	0	0	0	0	0	2	0	0	4	0	0	0	0	0	0	1	0	0	0	0	0	1	0	2	0	0	0	k__Bacteria; p__Chloroflexi; c__Anaerolineae; o__Ardenticatenales; f__Ardenticatenaceae; g__norank_f__Ardenticatenaceae; s__unidentified_marine_bacterioplankton_g__norank_f__Ardenticatenaceae
OTU176	0	0	0	0	0	0	0	0	0	0	0	4	0	0	0	0	0	0	0	0	0	0	0	0	0	0	0	0	0	0	k__Bacteria; p__Fusobacteria; c__Fusobacteriia; o__Fusobacteriales; f__Leptotrichiaceae; g__Leptotrichia; s__Leptotrichia_buccalis_C-1013-b
OTU177	0	0	0	0	0	0	0	0	0	0	0	1	0	0	0	0	0	0	1	0	0	0	1	0	0	0	0	0	0	0	k__Bacteria; p__Proteobacteria; c__Alphaproteobacteria; o__Rhizobiales; f__Hyphomicrobiaceae; g__Pedomicrobium; s__unclassified_g__Pedomicrobium
OTU178	20	0	0	3	7	4	0	0	18	0	0	6325	0	0	0	0	0	0	0	0	0	0	0	0	0	0	0	0	0	0	k__Bacteria; p__Bacteroidetes; c__Bacteroidia; o__Flavobacteriales; f__Blattabacteriaceae; g__Candidatus_Uzinura; s__unclassified_g__Candidatus_Uzinura
OTU179	0	0	0	5	0	0	0	0	1	0	0	3	0	0	0	0	0	0	0	4	0	0	0	2	2	0	0	0	0	0	k__Bacteria; p__Actinobacteria; c__Actinobacteria; o__Micrococcales; f__Micrococcaceae; g__Kocuria; s__Kocuria_palustris
OTU180	1	0	0	0	0	0	0	0	0	0	0	0	4	0	2	0	0	0	1	0	0	0	0	0	2	0	0	0	23	2	k__Bacteria; p__Firmicutes; c__Bacilli; o__Bacillales; f__Bacillaceae; g__Bacillus; s__Bacillus_aerophilus
OTU181	2	10	6	0	6	2	14	1	9	14	9	4	4	0	0	6	1	6	2	3	1	0	17	0	3	1	10	1	0	0	k__Bacteria; p__Proteobacteria; c__Gammaproteobacteria; o__Betaproteobacteriales; f__Burkholderiaceae; g__Janthinobacterium; s__uncultured_bacterium_g__Janthinobacterium
OTU182	0	0	0	0	0	0	0	0	0	0	0	0	0	0	0	0	0	0	1	0	0	0	0	0	1	0	1	1	6	0	k__Bacteria; p__Proteobacteria; c__Alphaproteobacteria; o__Rhizobiales; f__Xanthobacteraceae; g__unclassified_f__Xanthobacteraceae; s__unclassified_f__Xanthobacteraceae
OTU184	0	0	0	0	0	0	0	0	0	0	0	0	1	0	0	0	0	0	0	0	0	0	0	0	0	0	0	0	0	0	k__Bacteria; p__Proteobacteria; c__Alphaproteobacteria; o__Caulobacterales; f__Caulobacteraceae; g__Brevundimonas; s__unclassified_g__Brevundimonas
OTU185	0	0	0	0	0	0	0	0	0	0	0	0	1	0	0	0	0	0	0	0	0	0	0	0	0	0	0	0	0	0	k__Bacteria; p__Actinobacteria; c__Actinobacteria; o__Pseudonocardiales; f__Pseudonocardiaceae; g__Pseudonocardia; s__unclassified_g__Pseudonocardia
OTU186	0	0	0	0	0	0	0	0	0	0	0	0	1	0	0	0	0	0	0	0	0	0	0	0	0	0	0	0	0	0	k__Bacteria; p__Proteobacteria; c__Alphaproteobacteria; o__Rhizobiales; f__Beijerinckiaceae; g__Bosea; s__unclassified_g__Bosea
OTU187	0	0	0	0	0	0	0	0	0	0	0	0	2	0	0	0	0	0	0	0	0	0	0	0	0	0	0	0	0	0	k__Bacteria; p__Proteobacteria; c__Alphaproteobacteria; o__Caulobacterales; f__Caulobacteraceae; g__Brevundimonas; s__unclassified_g__Brevundimonas
OTU188	0	0	0	0	0	0	0	0	0	0	0	0	4	0	0	0	0	0	0	0	0	0	0	0	0	0	0	0	0	0	k__Bacteria; p__Proteobacteria; c__Alphaproteobacteria; o__Caulobacterales; f__Caulobacteraceae; g__norank_f__Caulobacteraceae; s__metagenome_g__norank_f__Caulobacteraceae
OTU189	0	0	0	0	0	0	0	0	0	0	0	0	2	0	0	0	0	0	2	0	0	0	0	0	3	0	0	0	0	0	k__Bacteria; p__Firmicutes; c__Bacilli; o__Bacillales; f__Paenibacillaceae; g__Ammoniphilus; s__uncultured_bacterium_g__Ammoniphilus
OTU191	0	0	0	0	0	0	0	0	0	0	0	0	1	0	0	0	0	0	0	0	0	0	0	0	0	0	0	0	0	0	k__Bacteria; p__Firmicutes; c__Bacilli; o__Bacillales; f__Bacillaceae; g__Fictibacillus; s__unclassified_g__Fictibacillus
OTU193	0	0	0	0	0	0	0	0	0	0	0	0	1	0	0	0	0	0	0	0	0	0	0	0	0	0	0	0	0	0	k__Bacteria; p__Proteobacteria; c__Alphaproteobacteria; o__Rhodospirillales; f__norank_o__Rhodospirillales; g__norank_o__Rhodospirillales; s__uncultured_soil_bacterium_g__norank_o__Rhodospirillales
OTU198	0	0	1	0	0	0	0	0	1	0	1	0	1	0	0	0	0	0	0	0	0	0	0	0	0	0	0	0	0	0	k__Bacteria; p__Bacteroidetes; c__Bacteroidia; o__Flavobacteriales; f__Flavobacteriaceae; g__Flavobacterium; s__unclassified_g__Flavobacterium
OTU199	6	4	10	12	9	7	17	13	7	21	9	1	5	1	15	9	5	1	8	7	1	1	33	0	25	0	5	11	1	3	k__Bacteria; p__Proteobacteria; c__Alphaproteobacteria; o__Rhizobiales; f__Beijerinckiaceae; g__Bosea; s__unclassified_g__Bosea
OTU201	0	0	1	0	0	2	0	0	0	0	0	0	2	0	0	0	0	0	0	0	0	0	0	0	0	0	0	0	0	0	k__Bacteria; p__Bacteroidetes; c__Bacteroidia; o__Flavobacteriales; f__Flavobacteriaceae; g__Flavobacterium; s__unclassified_g__Flavobacterium
OTU202	0	2	0	0	0	0	1	0	0	0	0	0	8	0	0	1	0	0	0	0	0	0	0	0	1	0	1	0	0	2	k__Bacteria; p__Proteobacteria; c__Gammaproteobacteria; o__Betaproteobacteriales; f__Burkholderiaceae; g__Massilia; s__Massilia_haematophila
OTU204	0	0	3	0	0	0	0	0	0	0	0	0	1	1	0	2	0	0	0	2	1	0	0	1	1	0	0	0	0	1	k__Bacteria; p__Proteobacteria; c__Alphaproteobacteria; o__Sphingomonadales; f__Sphingomonadaceae; g__unclassified_f__Sphingomonadaceae; s__unclassified_f__Sphingomonadaceae
OTU205	0	0	0	0	0	0	0	0	0	0	0	0	2	0	0	0	0	0	0	0	0	0	0	0	0	0	0	0	0	0	k__Bacteria; p__Proteobacteria; c__Alphaproteobacteria; o__Rhodospirillales; f__norank_o__Rhodospirillales; g__norank_o__Rhodospirillales; s__unclassified_g__norank_o__Rhodospirillales
OTU206	157	1076	1053	878	818	714	988	1295	813	1122	1121	122	24	85	983	709	527	168	33	313	21	0	35	79	143	2	398	0	163	0	k__Bacteria; p__Bacteroidetes; c__Bacteroidia; o__Flavobacteriales; f__Flavobacteriaceae; g__Flavobacterium; s__unclassified_g__Flavobacterium
OTU209	0	0	0	0	0	0	0	0	0	0	0	0	3	0	0	0	0	0	0	0	0	0	0	0	0	0	0	0	0	0	k__Bacteria; p__Proteobacteria; c__Deltaproteobacteria; o__Bdellovibrionales; f__Bdellovibrionaceae; g__Bdellovibrio; s__unclassified_g__Bdellovibrio
OTU210	0	0	0	0	0	0	0	0	0	0	0	0	2	0	0	0	0	0	0	0	0	0	0	0	0	0	0	0	0	0	k__Bacteria; p__Proteobacteria; c__Gammaproteobacteria; o__Betaproteobacteriales; f__Burkholderiaceae; g__unclassified_f__Burkholderiaceae; s__unclassified_f__Burkholderiaceae
OTU211	0	0	0	0	0	0	0	0	0	0	0	0	4	0	0	0	0	0	2	0	0	0	0	0	0	0	4	0	0	0	k__Bacteria; p__Actinobacteria; c__Actinobacteria; o__Micrococcales; f__Micrococcaceae; g__Pseudarthrobacter; s__unclassified_g__Pseudarthrobacter
OTU212	1	6	13	0	9	10	0	0	1	0	0	0	4	1	0	0	0	0	1	5	0	0	0	0	8	0	1	1	0	0	k__Bacteria; p__Proteobacteria; c__Alphaproteobacteria; o__Sphingomonadales; f__Sphingomonadaceae; g__Sphingomonas; s__Sphingomonas_aestuarii
OTU213	0	1	1	3	0	2	13	4	1	0	1	1	6	1	0	4	0	5	0	0	0	0	171	1	0	0	84	2	0	0	k__Bacteria; p__Proteobacteria; c__Gammaproteobacteria; o__Betaproteobacteriales; f__Burkholderiaceae; g__Herbaspirillum; s__unclassified_g__Herbaspirillum
OTU214	0	0	0	0	0	0	0	0	0	0	0	0	1	0	0	0	0	0	0	0	0	0	0	0	0	0	0	0	0	0	k__Bacteria; p__Proteobacteria; c__Gammaproteobacteria; o__Betaproteobacteriales; f__Burkholderiaceae; g__unclassified_f__Burkholderiaceae; s__unclassified_f__Burkholderiaceae
OTU215	0	0	0	0	0	0	0	0	0	0	0	0	1	0	0	0	0	0	0	0	0	0	0	0	0	0	0	0	0	0	k__Bacteria; p__Proteobacteria; c__Gammaproteobacteria; o__Betaproteobacteriales; f__Burkholderiaceae; g__unclassified_f__Burkholderiaceae; s__unclassified_f__Burkholderiaceae
OTU216	0	0	0	1	0	1	1	0	0	1	1	0	1	0	2	1	1	1	0	0	0	0	0	0	0	0	0	0	0	0	k__Bacteria; p__Proteobacteria; c__Alphaproteobacteria; o__Rhizobiales; f__Rhizobiaceae; g__Allorhizobium-Neorhizobium-Pararhizobium-Rhizobium; s__unclassified_g__Allorhizobium-Neorhizobium-Pararhizobium-Rhizobium
OTU217	0	0	0	0	0	0	0	0	0	0	0	0	2	0	0	0	0	0	0	0	0	0	0	0	0	0	0	0	0	0	k__Bacteria; p__Proteobacteria; c__Alphaproteobacteria; o__Rhizobiales; f__Rhizobiaceae; g__Allorhizobium-Neorhizobium-Pararhizobium-Rhizobium; s__unclassified_g__Allorhizobium-Neorhizobium-Pararhizobium-Rhizobium
OTU218	2	179	0	0	0	1	14	3	3	0	1	2	37	0	0	2	0	0	0	0	0	1	0	0	9	0	1	0	0	0	k__Bacteria; p__Bacteroidetes; c__Bacteroidia; o__Flavobacteriales; f__Flavobacteriaceae; g__Flavobacterium; s__uncultured_Cytophaga_sp._g__Flavobacterium
OTU220	0	0	0	0	0	0	0	0	0	0	0	0	1	0	0	0	0	0	0	0	0	0	0	0	0	0	0	0	0	0	k__Bacteria; p__Proteobacteria; c__Gammaproteobacteria; o__Xanthomonadales; f__Xanthomonadaceae; g__Stenotrophomonas; s__unclassified_g__Stenotrophomonas
OTU221	0	0	0	0	0	0	0	0	0	0	0	0	1	0	0	0	0	0	0	0	0	0	0	0	0	0	0	0	0	0	k__Bacteria; p__Proteobacteria; c__Alphaproteobacteria; o__unclassified_c__Alphaproteobacteria; f__unclassified_c__Alphaproteobacteria; g__unclassified_c__Alphaproteobacteria; s__unclassified_c__Alphaproteobacteria
OTU222	0	0	1	0	0	0	0	0	0	0	0	0	0	0	0	0	0	0	0	1	0	0	0	0	0	0	0	0	0	0	k__Bacteria; p__Proteobacteria; c__Gammaproteobacteria; o__Pseudomonadales; f__Pseudomonadaceae; g__Pseudomonas; s__unclassified_g__Pseudomonas
OTU223	0	0	0	0	0	0	0	0	0	0	0	0	1	0	0	0	0	0	0	0	0	0	0	0	0	0	0	0	0	0	k__Bacteria; p__Bacteroidetes; c__Bacteroidia; o__Flavobacteriales; f__Flavobacteriaceae; g__Flavobacterium; s__unclassified_g__Flavobacterium
OTU224	0	0	0	0	0	0	0	0	0	0	0	0	1	0	0	0	0	0	0	0	0	0	0	0	0	0	0	0	0	0	k__Bacteria; p__Bacteroidetes; c__Bacteroidia; o__Flavobacteriales; f__Flavobacteriaceae; g__Flavobacterium; s__unclassified_g__Flavobacterium
OTU226	0	0	0	0	0	0	0	0	0	0	0	0	3	0	0	0	0	0	0	0	0	0	0	0	0	0	0	0	0	0	k__Bacteria; p__Proteobacteria; c__Alphaproteobacteria; o__Rhizobiales; f__Beijerinckiaceae; g__Methylobacterium; s__unclassified_g__Methylobacterium
OTU227	0	0	0	0	0	0	0	0	0	0	0	0	2	0	0	0	0	0	0	0	0	0	0	0	0	0	0	0	0	0	k__Bacteria; p__Proteobacteria; c__Deltaproteobacteria; o__Bdellovibrionales; f__Bdellovibrionaceae; g__Bdellovibrio; s__unclassified_g__Bdellovibrio
OTU231	0	0	0	0	0	0	0	0	0	0	0	0	2	0	0	0	0	0	0	0	0	0	0	0	0	0	0	0	0	0	k__Bacteria; p__Bacteroidetes; c__Bacteroidia; o__Flavobacteriales; f__Flavobacteriaceae; g__Flavobacterium; s__unclassified_g__Flavobacterium
OTU232	0	0	1	2	1	3	0	0	1	3	1	0	1	0	1	0	1	0	0	1	0	0	0	0	1	0	1	0	0	0	k__Bacteria; p__Proteobacteria; c__Gammaproteobacteria; o__Betaproteobacteriales; f__Burkholderiaceae; g__unclassified_f__Burkholderiaceae; s__unclassified_f__Burkholderiaceae
OTU236	0	1	0	0	1	1	4	2	0	1	2	0	25	0	2	5	1	0	0	0	0	0	0	0	0	0	3	0	0	0	k__Bacteria; p__Proteobacteria; c__Gammaproteobacteria; o__Betaproteobacteriales; f__Burkholderiaceae; g__unclassified_f__Burkholderiaceae; s__unclassified_f__Burkholderiaceae
OTU237	1	1	0	2	1	0	0	1	0	1	1	0	27	0	0	1	1	2	0	0	0	0	0	0	0	0	0	0	0	0	k__Bacteria; p__Proteobacteria; c__Gammaproteobacteria; o__Betaproteobacteriales; f__Burkholderiaceae; g__unclassified_f__Burkholderiaceae; s__unclassified_f__Burkholderiaceae
OTU238	0	1	0	5	7	8	3	1	7	4	2	0	5	0	3	4	0	0	0	0	0	0	0	0	1	0	3	0	1	0	k__Bacteria; p__Proteobacteria; c__Alphaproteobacteria; o__Caulobacterales; f__Caulobacteraceae; g__Brevundimonas; s__Brevundimonas_nasdae
OTU241	0	0	0	0	0	0	0	0	0	0	0	0	1	0	0	0	0	0	0	0	0	0	0	0	0	0	0	0	0	0	k__Bacteria; p__Proteobacteria; c__Gammaproteobacteria; o__Betaproteobacteriales; f__Burkholderiaceae; g__unclassified_f__Burkholderiaceae; s__unclassified_f__Burkholderiaceae
OTU242	0	0	0	0	0	0	0	0	0	0	0	0	1	0	0	0	0	0	0	0	0	0	0	0	0	0	0	0	0	0	k__Bacteria; p__Proteobacteria; c__Deltaproteobacteria; o__Bdellovibrionales; f__Bdellovibrionaceae; g__Bdellovibrio; s__unclassified_g__Bdellovibrio
OTU244	0	0	0	0	0	0	0	1	0	0	0	0	1	0	1	0	0	0	0	0	0	0	0	0	0	0	0	0	0	0	k__Bacteria; p__Bacteroidetes; c__Bacteroidia; o__Flavobacteriales; f__Flavobacteriaceae; g__Flavobacterium; s__unclassified_g__Flavobacterium
OTU245	0	0	0	0	0	0	0	0	0	0	0	0	2	0	0	0	0	0	0	0	0	0	0	0	0	0	0	0	0	0	k__Bacteria; p__Proteobacteria; c__Gammaproteobacteria; o__Betaproteobacteriales; f__Burkholderiaceae; g__unclassified_f__Burkholderiaceae; s__unclassified_f__Burkholderiaceae
OTU246	0	0	0	0	0	0	0	0	0	0	0	0	1	0	0	0	0	0	0	0	0	0	0	0	0	0	0	0	0	0	k__Bacteria; p__Proteobacteria; c__Alphaproteobacteria; o__Caulobacterales; f__Caulobacteraceae; g__Brevundimonas; s__unclassified_g__Brevundimonas
OTU251	0	1	0	0	0	0	0	0	2	0	0	1	2	0	1	1	0	0	0	1	0	0	0	0	0	0	1	0	0	0	k__Bacteria; p__Bacteroidetes; c__Bacteroidia; o__Flavobacteriales; f__Flavobacteriaceae; g__Flavobacterium; s__unclassified_g__Flavobacterium
OTU252	0	0	0	0	1	0	0	1	0	0	0	0	0	0	0	0	0	0	0	0	0	0	0	0	0	0	0	0	0	0	k__Bacteria; p__Bacteroidetes; c__Bacteroidia; o__Flavobacteriales; f__Flavobacteriaceae; g__Flavobacterium; s__unclassified_g__Flavobacterium
OTU253	0	0	0	0	0	0	0	0	0	0	0	0	4	0	0	0	0	0	0	0	0	0	0	0	3	0	0	0	0	0	k__Bacteria; p__Actinobacteria; c__Actinobacteria; o__Frankiales; f__unclassified_o__Frankiales; g__unclassified_o__Frankiales; s__unclassified_o__Frankiales
OTU254	0	3	0	0	0	0	0	0	0	0	0	0	6	0	0	0	0	0	0	0	0	0	0	0	1	0	0	0	0	0	k__Bacteria; p__Chlamydiae; c__Chlamydiae; o__Chlamydiales; f__Parachlamydiaceae; g__Candidatus_Rubidus; s__Candidatus_Rubidus_massiliensis
OTU255	0	0	0	0	0	0	0	0	0	0	0	0	2	0	0	0	0	0	0	0	0	0	0	0	0	0	0	0	0	0	k__Bacteria; p__Proteobacteria; c__Gammaproteobacteria; o__Betaproteobacteriales; f__Burkholderiaceae; g__unclassified_f__Burkholderiaceae; s__unclassified_f__Burkholderiaceae
OTU257	0	4	0	0	0	0	0	0	0	0	0	0	2	0	0	0	0	0	0	0	0	0	0	0	0	0	0	0	0	0	k__Bacteria; p__Dependentiae; c__Babeliae; o__Babeliales; f__Vermiphilaceae; g__norank_f__Vermiphilaceae; s__uncultured_bacterium_g__norank_f__Vermiphilaceae
OTU258	0	0	0	0	0	0	0	0	0	0	0	0	9	0	0	0	0	0	0	0	0	0	0	0	0	0	0	0	0	0	k__Bacteria; p__Bacteroidetes; c__Bacteroidia; o__Flavobacteriales; f__Flavobacteriaceae; g__Galbibacter; s__unclassified_g__Galbibacter
OTU260	0	0	1	0	0	0	0	0	1	0	1	0	1	0	0	0	0	0	0	0	0	0	0	0	0	0	0	0	0	0	k__Bacteria; p__Proteobacteria; c__Alphaproteobacteria; o__Rhizobiales; f__Rhizobiaceae; g__Allorhizobium-Neorhizobium-Pararhizobium-Rhizobium; s__unclassified_g__Allorhizobium-Neorhizobium-Pararhizobium-Rhizobium
OTU261	0	0	0	0	0	0	0	0	0	0	0	0	6	0	0	0	0	0	0	0	0	0	0	0	0	0	0	0	0	0	k__Bacteria; p__Proteobacteria; c__Deltaproteobacteria; o__Bdellovibrionales; f__Bdellovibrionaceae; g__Bdellovibrio; s__Bdellovibrio_bacteriovorus
OTU262	0	0	0	0	0	0	0	0	0	0	0	0	1	0	0	0	0	0	0	0	0	0	0	0	0	0	0	0	0	0	k__Bacteria; p__Cyanobacteria; c__Sericytochromatia; o__norank_c__Sericytochromatia; f__norank_c__Sericytochromatia; g__norank_c__Sericytochromatia; s__Hyaloperonospora_arabidopsidis_g__norank
OTU263	0	0	0	0	0	0	0	0	0	0	0	0	1	0	0	0	0	0	0	0	0	0	0	0	0	0	0	0	0	0	k__Bacteria; p__Proteobacteria; c__Gammaproteobacteria; o__Xanthomonadales; f__Xanthomonadaceae; g__Stenotrophomonas; s__unclassified_g__Stenotrophomonas
OTU264	0	5	1	0	8	0	4	0	0	6	4	0	5	2	6	3	0	0	0	1	0	0	0	1	0	0	3	0	0	0	k__Bacteria; p__Proteobacteria; c__Alphaproteobacteria; o__Rhodospirillales; f__norank_o__Rhodospirillales; g__norank_o__Rhodospirillales; s__metagenome_g__norank_o__Rhodospirillales
OTU265	0	6	0	0	0	0	2	0	0	0	0	0	4	0	0	0	0	0	1	0	0	1	0	0	2	0	3	0	0	0	k__Bacteria; p__Proteobacteria; c__Alphaproteobacteria; o__Rhizobiales; f__Xanthobacteraceae; g__Pseudorhodoplanes; s__uncultured_bacterium_g__Pseudorhodoplanes
OTU266	0	0	0	0	0	0	0	0	0	0	0	0	1	0	0	0	0	0	0	0	0	0	0	0	0	0	0	0	0	0	k__Bacteria; p__Proteobacteria; c__Gammaproteobacteria; o__Betaproteobacteriales; f__Burkholderiaceae; g__unclassified_f__Burkholderiaceae; s__unclassified_f__Burkholderiaceae
OTU269	0	0	0	0	0	1	0	0	0	0	0	0	9	0	0	0	0	0	0	0	0	0	0	0	0	0	0	0	0	0	k__Bacteria; p__Proteobacteria; c__Gammaproteobacteria; o__Salinisphaerales; f__Solimonadaceae; g__Hydrocarboniphaga; s__uncultured_bacterium_g__Hydrocarboniphaga
OTU270	0	0	1	0	1	0	2	1	0	0	1	0	5	0	1	1	2	0	8	0	0	0	0	0	0	0	0	2	0	0	k__Bacteria; p__Proteobacteria; c__Gammaproteobacteria; o__Xanthomonadales; f__Xanthomonadaceae; g__Stenotrophomonas; s__unclassified_g__Stenotrophomonas
OTU271	4	16	12	1	5	10	3	3	2	5	27	3	3	2	5	18	11	1	0	6	0	0	0	0	3	0	4	0	0	0	k__Bacteria; p__Proteobacteria; c__Gammaproteobacteria; o__Betaproteobacteriales; f__Burkholderiaceae; g__unclassified_f__Burkholderiaceae; s__unclassified_f__Burkholderiaceae
OTU272	0	0	0	0	0	0	0	0	0	0	0	0	4	0	0	0	0	0	0	0	0	0	0	0	0	0	0	0	0	0	k__Bacteria; p__Proteobacteria; c__Alphaproteobacteria; o__Caulobacterales; f__Caulobacteraceae; g__Brevundimonas; s__Brevundimonas_aurantiaca
OTU273	0	0	0	0	0	0	0	0	0	0	0	0	8	0	0	0	0	0	0	0	0	0	0	0	0	0	0	0	0	0	k__Bacteria; p__Bacteroidetes; c__Bacteroidia; o__Flavobacteriales; f__Flavobacteriaceae; g__unclassified_f__Flavobacteriaceae; s__unclassified_f__Flavobacteriaceae
OTU275	1	29	32	57	43	29	0	19	39	38	0	3	59	2	31	17	10	3	1	21	0	0	2	3	0	0	5	0	2	1	k__Bacteria; p__Bacteroidetes; c__Bacteroidia; o__Flavobacteriales; f__Flavobacteriaceae; g__Flavobacterium; s__unclassified_g__Flavobacterium
OTU276	2	0	0	0	0	3	0	0	0	0	0	0	6	0	0	0	0	0	0	0	0	0	0	0	0	0	0	0	0	0	k__Bacteria; p__Proteobacteria; c__Gammaproteobacteria; o__Xanthomonadales; f__Xanthomonadaceae; g__unclassified_f__Xanthomonadaceae; s__unclassified_f__Xanthomonadaceae
OTU277	1	0	0	0	0	0	0	0	0	0	1	0	2	0	3	3	0	2	29	1	0	0	1	2	0	0	6	0	21	0	k__Bacteria; p__Proteobacteria; c__unclassified_p__Proteobacteria; o__unclassified_p__Proteobacteria; f__unclassified_p__Proteobacteria; g__unclassified_p__Proteobacteria; s__unclassified_p__Proteobacteria
OTU278	0	0	1	0	0	2	0	0	0	1	0	0	1	0	0	0	0	0	0	0	0	0	2	0	21	0	4	0	0	0	k__Bacteria; p__Proteobacteria; c__Alphaproteobacteria; o__unclassified_c__Alphaproteobacteria; f__unclassified_c__Alphaproteobacteria; g__unclassified_c__Alphaproteobacteria; s__unclassified_c__Alphaproteobacteria
OTU279	0	0	0	0	0	0	0	0	0	0	0	0	1	0	0	0	0	0	0	0	0	0	0	0	0	0	0	0	0	0	k__Bacteria; p__Bacteroidetes; c__Bacteroidia; o__Flavobacteriales; f__Flavobacteriaceae; g__Flavobacterium; s__unclassified_g__Flavobacterium
OTU280	0	0	0	0	0	0	0	0	0	0	0	0	7	0	0	0	0	0	0	0	0	0	0	0	0	0	0	0	0	0	k__Bacteria; p__Proteobacteria; c__Gammaproteobacteria; o__Betaproteobacteriales; f__Burkholderiaceae; g__Delftia; s__uncultured_organism_g__Delftia
OTU283	0	0	0	0	0	0	0	0	0	0	1	0	8	0	0	0	0	0	0	0	0	0	0	0	0	0	0	0	0	0	k__Bacteria; p__Proteobacteria; c__Deltaproteobacteria; o__Bdellovibrionales; f__Bdellovibrionaceae; g__Bdellovibrio; s__Bdellovibrio_bacteriovorus
OTU284	0	0	0	0	0	0	0	0	0	0	0	0	1	0	0	0	0	0	0	0	0	0	0	0	0	0	0	0	0	0	k__Bacteria; p__Proteobacteria; c__Gammaproteobacteria; o__Enterobacteriales; f__Enterobacteriaceae; g__unclassified_f__Enterobacteriaceae; s__unclassified_f__Enterobacteriaceae
OTU285	344	1218	1421	1405	1535	1680	981	1332	1091	1417	1547	283	911	215	1604	1296	986	255	36	500	17	3	104	104	252	2	537	3	164	0	k__Bacteria; p__Proteobacteria; c__Gammaproteobacteria; o__Betaproteobacteriales; f__Burkholderiaceae; g__Comamonas; s__Comamonas_aquatica
OTU286	0	1	2	6	3	3	4	0	0	1	6	1	5	0	0	0	1	0	0	0	0	0	0	0	0	0	0	0	0	0	k__Bacteria; p__Proteobacteria; c__Alphaproteobacteria; o__Rhizobiales; f__Rhizobiaceae; g__Allorhizobium-Neorhizobium-Pararhizobium-Rhizobium; s__Agrobacterium_nepotum
OTU288	0	0	0	0	0	0	0	0	0	0	0	0	1	0	0	0	0	0	0	0	0	0	0	0	0	0	0	0	0	0	k__Bacteria; p__Bacteroidetes; c__Bacteroidia; o__Sphingobacteriales; f__env.OPS_17; g__norank_f__env.OPS_17; s__unclassified_g__norank_f__env.OPS_17
OTU289	0	0	0	0	0	0	0	0	0	0	0	0	2	0	0	0	0	0	0	0	0	0	0	0	0	0	0	0	0	0	k__Bacteria; p__unclassified_k__Bacteria; c__unclassified_k__norank_d__Bacteria; p__unclassified_k__Bacteria; p__unclassified_k__Bacteria; p__unclassified_k__Bacteria; p__unclassified_k__Bacteria
OTU290	0	0	0	0	0	0	0	0	0	0	0	0	2	0	0	0	0	0	0	0	0	0	0	0	0	0	0	0	0	0	k__Bacteria; p__Proteobacteria; c__Alphaproteobacteria; o__Rhizobiales; f__Rhizobiaceae; g__Allorhizobium-Neorhizobium-Pararhizobium-Rhizobium; s__unclassified_g__Allorhizobium-Neorhizobium-Pararhizobium-Rhizobium
OTU291	0	0	0	1	1	0	1	0	0	0	0	0	2	0	1	0	0	0	0	0	0	0	0	0	0	0	0	0	0	0	k__Bacteria; p__Proteobacteria; c__Alphaproteobacteria; o__Rhizobiales; f__Rhizobiaceae; g__Allorhizobium-Neorhizobium-Pararhizobium-Rhizobium; s__unclassified_g__Allorhizobium-Neorhizobium-Pararhizobium-Rhizobium
OTU292	0	0	0	0	0	0	0	0	0	0	0	0	2	0	0	0	0	0	0	0	0	0	0	0	0	0	0	0	0	0	k__Bacteria; p__Actinobacteria; c__Actinobacteria; o__Micrococcales; f__Micrococcaceae; g__Micrococcus; s__unclassified_g__Micrococcus
OTU293	0	0	0	0	0	0	0	0	0	0	0	0	1	0	0	0	0	0	0	0	0	0	0	0	0	0	0	0	0	0	k__Bacteria; p__Proteobacteria; c__Gammaproteobacteria; o__Betaproteobacteriales; f__Burkholderiaceae; g__Delftia; s__unclassified_g__Delftia
OTU296	0	0	0	0	0	0	0	0	0	0	0	0	7	0	0	0	0	0	0	0	0	0	0	0	0	0	0	0	0	0	k__Bacteria; p__Bacteroidetes; c__Bacteroidia; o__Flavobacteriales; f__Flavobacteriaceae; g__Flavobacterium; s__unclassified_g__Flavobacterium
OTU297	0	0	0	0	0	0	0	0	0	0	0	0	2	0	0	0	0	0	0	0	0	0	0	0	0	0	0	0	0	0	k__Bacteria; p__Proteobacteria; c__Alphaproteobacteria; o__Rhizobiales; f__Rhizobiaceae; g__Allorhizobium-Neorhizobium-Pararhizobium-Rhizobium; s__unclassified_g__Allorhizobium-Neorhizobium-Pararhizobium-Rhizobium
OTU298	0	0	0	0	0	0	0	0	0	0	0	0	1	0	0	0	0	0	0	0	0	0	0	0	0	0	0	0	0	0	k__Bacteria; p__Proteobacteria; c__Alphaproteobacteria; o__Rhodospirillales; f__norank_o__Rhodospirillales; g__norank_o__Rhodospirillales; s__uncultured_soil_bacterium_g__norank_o__Rhodospirillales
OTU299	0	0	0	0	0	0	0	0	0	0	0	0	1	0	0	0	0	0	0	0	0	0	0	0	0	0	0	0	0	0	k__Bacteria; p__Proteobacteria; c__Gammaproteobacteria; o__Betaproteobacteriales; f__Burkholderiaceae; g__Delftia; s__unclassified_g__Delftia
OTU300	0	0	0	0	0	0	0	0	0	0	0	0	1	0	0	0	0	0	0	0	0	0	0	0	0	0	0	0	0	0	k__Bacteria; p__Proteobacteria; c__Alphaproteobacteria; o__Caulobacterales; f__Caulobacteraceae; g__Brevundimonas; s__unclassified_g__Brevundimonas
OTU301	62	200	239	286	330	297	285	314	286	257	322	66	141	60	248	210	204	80	18	73	4	2	18	37	79	0	143	0	51	17	k__Bacteria; p__Proteobacteria; c__Alphaproteobacteria; o__Caulobacterales; f__Caulobacteraceae; g__Brevundimonas; s__unclassified_g__Brevundimonas
OTU302	0	0	0	0	0	0	10	0	0	0	0	0	3	0	0	1	0	0	1	0	0	0	1	0	1	0	0	0	0	1	k__Bacteria; p__Proteobacteria; c__Gammaproteobacteria; o__Betaproteobacteriales; f__Burkholderiaceae; g__Massilia; s__unclassified_g__Massilia
OTU303	0	0	0	0	0	0	0	0	0	0	0	0	6	0	0	0	0	0	0	0	0	0	0	0	0	0	0	0	0	0	k__Bacteria; p__Actinobacteria; c__Actinobacteria; o__Micrococcales; f__Brevibacteriaceae; g__Brevibacterium; s__Brevibacterium_casei
OTU304	0	0	0	0	0	0	0	0	0	0	0	0	2	0	0	0	0	0	0	0	0	0	0	0	0	0	0	0	0	0	k__Bacteria; p__Proteobacteria; c__Alphaproteobacteria; o__Rhizobiales; f__Rhizobiaceae; g__Shinella; s__unclassified_g__Shinella
OTU305	1	2	6	8	10	19	10	5	10	11	4	3	12	1	16	4	9	3	0	6	0	1	1	4	3	0	5	0	0	0	k__Bacteria; p__Proteobacteria; c__Alphaproteobacteria; o__Caulobacterales; f__Caulobacteraceae; g__Brevundimonas; s__unclassified_g__Brevundimonas
OTU308	0	1	0	0	0	0	0	0	0	0	1	0	0	0	0	0	0	0	0	0	0	0	0	0	0	0	0	0	0	0	k__Bacteria; p__Proteobacteria; c__Gammaproteobacteria; o__Betaproteobacteriales; f__Burkholderiaceae; g__Delftia; s__unclassified_g__Delftia
OTU310	0	0	0	0	0	0	0	0	0	0	0	0	1	0	0	0	0	0	0	0	0	0	0	0	0	0	0	0	0	0	k__Bacteria; p__Actinobacteria; c__Actinobacteria; o__Solirubrobacterales; f__Solirubrobacteraceae; g__Patulibacter; s__unclassified_g__Patulibacter
OTU311	0	0	0	0	0	0	0	0	0	0	0	0	8	0	0	0	0	0	0	2	0	0	0	0	0	0	0	0	0	0	k__Bacteria; p__Actinobacteria; c__Actinobacteria; o__Micrococcales; f__Micrococcaceae; g__Kocuria; s__Kocuria_marina
OTU312	0	0	0	0	0	0	0	0	0	0	0	0	1	0	0	0	0	0	0	0	0	0	0	0	0	0	0	0	0	0	k__Bacteria; p__Proteobacteria; c__Alphaproteobacteria; o__Rhizobiales; f__unclassified_o__Rhizobiales; g__unclassified_o__Rhizobiales; s__unclassified_o__Rhizobiales
OTU313	0	0	0	0	0	0	0	0	0	0	0	0	2	0	0	0	0	0	0	0	0	0	0	0	0	0	0	0	0	0	k__Bacteria; p__Proteobacteria; c__Gammaproteobacteria; o__Betaproteobacteriales; f__Burkholderiaceae; g__Delftia; s__unclassified_g__Delftia
OTU314	0	0	0	0	0	0	0	0	0	0	0	0	1	0	0	0	0	0	0	0	0	0	0	0	0	0	0	0	0	0	k__Bacteria; p__Proteobacteria; c__Gammaproteobacteria; o__Betaproteobacteriales; f__Burkholderiaceae; g__Delftia; s__unclassified_g__Delftia
OTU316	1	4	2	0	0	1	1	0	1	1	4	0	3	0	0	3	0	0	0	0	0	0	0	0	0	0	1	0	0	0	k__Bacteria; p__Proteobacteria; c__Gammaproteobacteria; o__Betaproteobacteriales; f__Burkholderiaceae; g__Delftia; s__unclassified_g__Delftia
OTU317	1	0	10	1	0	0	0	0	0	0	0	0	5	1	0	3	4	4	4	2	0	0	0	0	0	0	2	0	0	12	k__Bacteria; p__Firmicutes; c__Bacilli; o__Bacillales; f__Bacillaceae; g__Bacillus; s__Bacillus_halmapalus
OTU318	0	0	8	0	0	0	0	0	0	0	0	0	3	0	0	0	0	0	0	0	0	0	0	0	0	0	0	0	0	0	k__Bacteria; p__Firmicutes; c__Clostridia; o__Clostridiales; f__Family_XI_o__Clostridiales; g__Peptoniphilus; s__Peptoniphilus_harei
OTU319	0	0	0	0	0	0	0	0	0	0	0	0	1	0	0	0	0	0	0	0	0	0	0	0	0	0	0	0	0	0	k__Bacteria; p__Proteobacteria; c__Gammaproteobacteria; o__Betaproteobacteriales; f__Burkholderiaceae; g__unclassified_f__Burkholderiaceae; s__unclassified_f__Burkholderiaceae
OTU320	0	0	0	0	0	0	0	0	0	0	0	0	2	0	0	0	0	0	0	0	0	0	0	0	0	0	0	0	0	0	k__Bacteria; p__Proteobacteria; c__Alphaproteobacteria; o__Caulobacterales; f__Caulobacteraceae; g__Brevundimonas; s__unclassified_g__Brevundimonas
OTU321	0	0	0	0	0	0	0	0	0	0	0	0	1	0	0	0	0	0	0	0	0	0	0	0	0	0	0	0	0	0	k__Bacteria; p__Proteobacteria; c__Gammaproteobacteria; o__Betaproteobacteriales; f__Burkholderiaceae; g__unclassified_f__Burkholderiaceae; s__unclassified_f__Burkholderiaceae
OTU323	0	0	0	0	0	0	0	1	0	0	0	0	0	0	0	0	0	0	0	0	0	0	0	0	0	0	0	0	0	0	k__Bacteria; p__Proteobacteria; c__Alphaproteobacteria; o__Rhizobiales; f__Rhizobiaceae; g__Allorhizobium-Neorhizobium-Pararhizobium-Rhizobium; s__unclassified_g__Allorhizobium-Neorhizobium-Pararhizobium-Rhizobium
OTU324	0	0	0	0	0	0	0	0	0	0	0	0	9	0	0	0	0	0	0	0	0	0	0	0	0	0	0	0	0	0	k__Bacteria; p__Proteobacteria; c__Gammaproteobacteria; o__Pseudomonadales; f__Pseudomonadaceae; g__Pseudomonas; s__unclassified_g__Pseudomonas
OTU325	0	0	1	0	0	0	0	0	0	1	0	0	1	0	3	0	1	0	0	1	0	0	0	0	0	30	1	0	1	0	k__Bacteria; p__Proteobacteria; c__unclassified_p__Proteobacteria; o__unclassified_p__Proteobacteria; f__unclassified_p__Proteobacteria; g__unclassified_p__Proteobacteria; s__unclassified_p__Proteobacteria
OTU326	0	0	0	0	0	0	0	0	0	0	0	0	1	0	0	0	0	0	0	0	0	0	0	0	0	0	0	0	0	0	k__Bacteria; p__Proteobacteria; c__Gammaproteobacteria; o__Aeromonadales; f__Aeromonadaceae; g__Aeromonas; s__unclassified_g__Aeromonas
OTU327	1	10	11	12	4	7	9	6	2	4	10	0	5	0	1	7	9	3	2	7	0	0	0	0	1	0	2	0	1	0	k__Bacteria; p__Proteobacteria; c__Gammaproteobacteria; o__Betaproteobacteriales; f__Burkholderiaceae; g__Delftia; s__Delftia_tsuruhatensis
OTU328	0	0	0	0	0	0	0	0	0	0	1	0	2	0	0	0	0	1	0	0	0	0	0	0	0	0	0	0	0	0	k__Bacteria; p__Proteobacteria; c__Alphaproteobacteria; o__Rhizobiales; f__Rhizobiaceae; g__Allorhizobium-Neorhizobium-Pararhizobium-Rhizobium; s__unclassified_g__Allorhizobium-Neorhizobium-Pararhizobium-Rhizobium
OTU330	0	0	0	0	0	0	0	0	0	0	0	0	1	0	0	0	0	0	0	0	0	0	0	0	0	0	0	0	0	0	k__Bacteria; p__Proteobacteria; c__Alphaproteobacteria; o__Rhizobiales; f__Rhizobiaceae; g__Allorhizobium-Neorhizobium-Pararhizobium-Rhizobium; s__unclassified_g__Allorhizobium-Neorhizobium-Pararhizobium-Rhizobium
OTU331	0	0	0	0	0	0	0	0	0	0	2	0	1	0	0	0	0	0	0	0	0	0	0	0	0	0	0	0	0	0	k__Bacteria; p__Proteobacteria; c__Alphaproteobacteria; o__Rhizobiales; f__Rhizobiaceae; g__Allorhizobium-Neorhizobium-Pararhizobium-Rhizobium; s__unclassified_g__Allorhizobium-Neorhizobium-Pararhizobium-Rhizobium
OTU332	0	0	0	0	0	0	0	0	0	0	0	0	1	0	0	0	0	0	0	0	0	0	0	0	0	0	0	0	0	0	k__Bacteria; p__Proteobacteria; c__Alphaproteobacteria; o__Caulobacterales; f__Caulobacteraceae; g__Brevundimonas; s__unclassified_g__Brevundimonas
OTU333	0	0	0	0	0	0	0	0	0	0	0	0	2	0	0	0	0	0	0	0	0	0	0	0	0	0	0	0	0	0	k__Bacteria; p__Bacteroidetes; c__Bacteroidia; o__Flavobacteriales; f__Flavobacteriaceae; g__Flavobacterium; s__unclassified_g__Flavobacterium
OTU334	0	0	0	0	0	0	0	0	0	0	0	0	3	0	0	0	0	0	0	0	0	0	0	0	0	0	0	0	0	0	k__Bacteria; p__Proteobacteria; c__Deltaproteobacteria; o__Bdellovibrionales; f__Bdellovibrionaceae; g__Bdellovibrio; s__unclassified_g__Bdellovibrio
OTU335	0	0	0	0	0	0	0	0	0	0	0	0	5	0	0	0	0	0	1	0	0	0	0	0	2	0	0	0	0	1	k__Bacteria; p__Actinobacteria; c__Actinobacteria; o__Propionibacteriales; f__Nocardioidaceae; g__Nocardioides; s__Nocardioides_sp._g__Nocardioides
OTU337	0	0	0	0	0	0	0	0	0	0	0	0	3	0	0	0	0	0	0	0	0	2	1	0	0	0	0	0	0	0	k__Bacteria; p__Proteobacteria; c__Alphaproteobacteria; o__Rhizobiales; f__Xanthobacteraceae; g__Pseudorhodoplanes; s__uncultured_bacterium_g__Pseudorhodoplanes
OTU338	1	0	7	0	0	3	0	6	3	0	1	1	2	1	0	12	7	2	2	6	0	1	0	0	0	0	1	0	4	0	k__Bacteria; p__Proteobacteria; c__Gammaproteobacteria; o__Pseudomonadales; f__Pseudomonadaceae; g__Pseudomonas; s__unclassified_g__Pseudomonas
OTU339	0	2	0	9	1	9	9	1	1	0	2	2	2	0	2	0	2	1	0	0	0	0	0	0	0	0	0	0	0	0	k__Bacteria; p__Proteobacteria; c__Alphaproteobacteria; o__Rhizobiales; f__Rhizobiaceae; g__Allorhizobium-Neorhizobium-Pararhizobium-Rhizobium; s__unclassified_g__Allorhizobium-Neorhizobium-Pararhizobium-Rhizobium
OTU341	0	0	0	0	0	0	0	0	0	0	0	0	1	0	0	0	0	0	0	0	0	0	0	0	0	0	0	0	0	0	k__Bacteria; p__Proteobacteria; c__unclassified_p__Proteobacteria; o__unclassified_p__Proteobacteria; f__unclassified_p__Proteobacteria; g__unclassified_p__Proteobacteria; s__unclassified_p__Proteobacteria
OTU343	0	0	3	0	0	0	2	0	0	0	1	3	5	0	0	0	0	0	0	0	0	0	1	0	1	0	0	0	1	0	k__Bacteria; p__Proteobacteria; c__Alphaproteobacteria; o__Rhizobiales; f__Beijerinckiaceae; g__Methylobacterium; s__Methylobacterium_komagatae
OTU344	0	0	0	0	0	0	5	0	0	1	0	0	8	0	0	0	0	0	0	0	0	0	0	0	0	0	1	0	0	0	k__Bacteria; p__Proteobacteria; c__Gammaproteobacteria; o__Alteromonadales; f__Shewanellaceae; g__Shewanella; s__unclassified_g__Shewanella
OTU346	1	16	1	4	1	37	2	0	22	0	0	0	5	4	0	0	0	1	0	9	0	0	0	2	3	0	5	0	0	0	k__Bacteria; p__Actinobacteria; c__Actinobacteria; o__Pseudonocardiales; f__Pseudonocardiaceae; g__Pseudonocardia; s__unclassified_g__Pseudonocardia
OTU347	0	0	0	0	0	0	0	0	0	0	0	0	6	0	0	0	4	0	0	2	0	0	0	0	0	0	1	0	1	0	k__Bacteria; p__Proteobacteria; c__Alphaproteobacteria; o__Rhizobiales; f__Rhizobiaceae; g__Allorhizobium-Neorhizobium-Pararhizobium-Rhizobium; s__Rhizobium_mesoamericanum
OTU349	62	300	353	371	323	285	338	366	316	289	412	70	0	43	351	276	216	76	11	94	9	0	31	46	63	0	168	0	48	13	k__Bacteria; p__Proteobacteria; c__Deltaproteobacteria; o__Bdellovibrionales; f__Bdellovibrionaceae; g__Bdellovibrio; s__Bdellovibrio_bacteriovorus
OTU352	0	0	0	0	0	0	0	0	0	0	0	0	6	0	0	1	0	0	0	0	0	0	0	0	0	0	0	0	0	0	k__Bacteria; p__Proteobacteria; c__Alphaproteobacteria; o__Sphingomonadales; f__Sphingomonadaceae; g__Sphingomonas; s__Sphingomonas_koreensis
OTU353	0	0	0	0	0	0	0	0	0	0	0	0	10	0	0	0	0	0	0	0	0	0	0	0	0	0	0	0	0	0	k__Bacteria; p__FBP; c__norank_p__FBP; o__norank_p__FBP; f__norank_p__FBP; g__norank_p__FBP; s__uncultured_bacterium_g__norank_p__FBP
OTU354	10	24	15	56	26	21	22	13	62	13	31	5	0	3	61	42	40	13	2	35	0	0	0	4	6	1	39	0	3	0	k__Bacteria; p__Bacteroidetes; c__Bacteroidia; o__Flavobacteriales; f__Flavobacteriaceae; g__Flavobacterium; s__unclassified_g__Flavobacterium
OTU355	0	0	0	0	0	0	0	0	0	0	0	0	4	0	0	0	0	0	0	0	0	0	0	0	0	0	0	0	0	1	k__Bacteria; p__Actinobacteria; c__Actinobacteria; o__Corynebacteriales; f__Nocardiaceae; g__Nocardia; s__unclassified_g__Nocardia
OTU357	0	0	0	0	0	0	0	0	0	0	0	0	1	0	0	0	0	0	0	0	0	0	0	0	0	0	0	0	0	0	k__Bacteria; p__Actinobacteria; c__Actinobacteria; o__Streptomycetales; f__Streptomycetaceae; g__Streptomyces; s__unclassified_g__Streptomyces
OTU358	0	0	0	0	0	0	0	0	0	0	0	0	2	0	0	0	0	0	0	0	0	0	0	0	0	0	0	0	0	0	k__Bacteria; p__Proteobacteria; c__Gammaproteobacteria; o__Betaproteobacteriales; f__Burkholderiaceae; g__unclassified_f__Burkholderiaceae; s__unclassified_f__Burkholderiaceae
OTU359	0	1	3	0	2	2	1	0	1	0	0	0	2	0	0	0	0	0	0	1	0	0	0	0	0	0	1	0	0	0	k__Bacteria; p__Proteobacteria; c__unclassified_p__Proteobacteria; o__unclassified_p__Proteobacteria; f__unclassified_p__Proteobacteria; g__unclassified_p__Proteobacteria; s__unclassified_p__Proteobacteria
OTU361	0	0	1	0	0	0	2	0	0	5	6	1	2	2	0	5	0	0	0	2	0	0	1	0	0	0	2	0	0	0	k__Bacteria; p__Proteobacteria; c__Gammaproteobacteria; o__Alteromonadales; f__Shewanellaceae; g__Shewanella; s__Shewanella_xiamenensis
OTU362	0	0	0	0	0	0	0	0	0	0	1	0	2	0	1	0	0	0	0	0	0	0	0	0	0	0	0	0	0	0	k__Bacteria; p__Bacteroidetes; c__Bacteroidia; o__Flavobacteriales; f__Flavobacteriaceae; g__Flavobacterium; s__unclassified_g__Flavobacterium
OTU364	2	8	30	19	72	14	54	7	11	1	24	2	5	1	22	2	24	1	1	0	1	0	0	2	2	0	3	0	4	0	k__Bacteria; p__Bacteroidetes; c__Bacteroidia; o__Sphingobacteriales; f__Sphingobacteriaceae; g__Sphingobacterium; s__unclassified_g__Sphingobacterium
OTU365	0	0	0	1	0	0	0	0	0	0	0	0	0	7088	0	0	1	0	0	0	0	0	0	0	0	0	0	0	0	0	k__Bacteria; p__Bacteroidetes; c__Bacteroidia; o__Flavobacteriales; f__Blattabacteriaceae; g__Candidatus_Uzinura; s__unclassified_g__Candidatus_Uzinura
OTU366	0	0	0	0	0	0	0	0	0	0	0	0	0	2	0	0	0	0	0	0	0	0	0	0	0	0	0	0	0	0	k__Bacteria; p__Proteobacteria; c__Alphaproteobacteria; o__Sphingomonadales; f__Sphingomonadaceae; g__Sphingosinicella; s__uncultured_bacterium_g__Sphingosinicella
OTU368	0	3	0	0	0	0	0	0	0	0	0	0	0	0	5	0	0	0	0	0	0	0	0	0	0	0	0	0	0	0	k__Bacteria; p__Bacteroidetes; c__Bacteroidia; o__Flavobacteriales; f__Weeksellaceae; g__Chryseobacterium; s__Chryseobacterium_indologenes
OTU369	0	0	0	0	0	0	7	11	0	0	0	0	2	0	1	0	1	3	2	0	0	0	6	1	1	0	0	0	1	0	k__Bacteria; p__Proteobacteria; c__Gammaproteobacteria; o__Betaproteobacteriales; f__Burkholderiaceae; g__Massilia; s__Massilia_alkalitolerans
OTU370	1	0	6	0	0	0	0	0	11	0	0	0	0	0	14	0	0	2	0	0	0	0	1	0	1	0	0	0	0	1	k__Bacteria; p__Proteobacteria; c__Gammaproteobacteria; o__Betaproteobacteriales; f__Burkholderiaceae; g__Aquabacterium; s__unclassified_g__Aquabacterium
OTU371	0	0	0	0	0	0	0	0	0	0	0	0	0	0	5	0	0	0	0	0	0	0	0	0	0	0	0	0	0	0	k__Bacteria; p__Deinococcus-Thermus; c__Deinococci; o__Deinococcales; f__Deinococcaceae; g__Deinococcus; s__Deinococcus_wulumuqiensis
OTU372	0	0	0	0	0	0	0	0	0	0	0	0	0	0	2	0	0	0	0	0	0	0	0	0	0	0	0	0	0	0	k__Bacteria; p__Acidobacteria; c__Acidobacteriia; o__Solibacterales; f__Solibacteraceae_Subgroup_3; g__Bryobacter; s__unclassified_g__Bryobacter
OTU373	0	0	0	0	0	0	0	0	0	0	0	0	0	0	16	0	0	0	0	0	0	0	0	0	0	0	0	0	0	0	k__Bacteria; p__Firmicutes; c__Bacilli; o__Bacillales; f__Paenibacillaceae; g__Paenibacillus; s__Paenibacillus_humicus
OTU374	0	0	0	0	0	0	0	0	0	0	0	0	0	0	6	0	0	0	0	0	0	0	7	0	0	0	0	0	0	0	k__Bacteria; p__Actinobacteria; c__Actinobacteria; o__Micrococcales; f__Microbacteriaceae; g__Amnibacterium; s__uncultured_bacterium_g__Amnibacterium
OTU375	0	0	0	0	0	0	0	0	0	0	0	0	0	0	1	0	0	0	0	0	0	0	0	0	0	0	0	0	0	0	k__Bacteria; p__Actinobacteria; c__Actinobacteria; o__Micrococcales; f__Bogoriellaceae; g__Georgenia; s__uncultured_bacterium_g__Georgenia
OTU376	0	0	0	0	0	0	0	0	0	0	0	0	0	0	10	0	0	0	0	0	0	0	0	0	0	0	0	0	0	0	k__Bacteria; p__Bacteroidetes; c__Bacteroidia; o__Bacteroidales; f__Porphyromonadaceae; g__Porphyromonas; s__uncultured_bacterium_g__Porphyromonas
OTU378	0	0	0	0	0	0	0	0	0	0	0	0	0	0	1	0	0	0	0	0	0	0	0	0	0	0	0	0	0	0	k__Bacteria; p__Gemmatimonadetes; c__Gemmatimonadetes; o__Longimicrobiales; f__Longimicrobiaceae; g__norank_f__Longimicrobiaceae; s__metagenome_g__norank_f__Longimicrobiaceae
OTU379	0	0	0	0	0	0	0	0	0	0	0	0	0	0	0	12	0	0	0	1	0	0	0	0	0	0	0	0	0	0	k__Bacteria; p__Actinobacteria; c__Actinobacteria; o__Streptosporangiales; f__Thermomonosporaceae; g__Actinomadura; s__unclassified_g__Actinomadura
OTU380	0	0	0	0	0	0	0	0	0	0	0	0	0	0	0	9	0	0	2	1	2	0	15	0	2	0	9	16	22	0	k__Bacteria; p__Proteobacteria; c__Alphaproteobacteria; o__Rhizobiales; f__Rhizobiaceae; g__Allorhizobium-Neorhizobium-Pararhizobium-Rhizobium; s__Rhizobium_leguminosarum_bv._viciae
OTU381	0	29	15	0	1	0	13	1	6	2	0	2	12	1	0	146	1	15	1	82	3	4	2	1	3	0	63	15	83	68	k__Bacteria; p__Proteobacteria; c__Gammaproteobacteria; o__Enterobacteriales; f__Enterobacteriaceae; g__unclassified_f__Enterobacteriaceae; s__unclassified_f__Enterobacteriaceae
OTU382	0	0	0	1	1	0	0	2	3	4	2	0	0	0	0	10	4	4	2	2	0	2	0	0	0	0	8	0	1	0	k__Bacteria; p__Proteobacteria; c__Alphaproteobacteria; o__Sphingomonadales; f__Sphingomonadaceae; g__Sphingomonas; s__unclassified_g__Sphingomonas
OTU383	0	0	0	0	0	0	0	0	0	0	0	0	0	0	2	7	0	0	0	0	0	0	2	0	0	0	0	14	0	0	k__Bacteria; p__Firmicutes; c__Clostridia; o__Clostridiales; f__Clostridiaceae_1; g__Clostridium_sensu_stricto_1; s__Clostridium_saccharoperbutylacetonicum_N1-4HMT
OTU384	1	1	6	3	18	10	23	11	3	2	2	1	2	1	8	70	18	1	2	3	0	0	2	3	2	0	1	0	0	1	k__Bacteria; p__Actinobacteria; c__Actinobacteria; o__Propionibacteriales; f__Propionibacteriaceae; g__Cutibacterium; s__uncultured_organism_g__Cutibacterium
OTU385	10	55	60	55	114	76	66	54	107	67	75	8	143	13	96	55	69	41	6	40	0	0	13	8	17	0	61	0	19	1	k__Bacteria; p__Bacteroidetes; c__Bacteroidia; o__Flavobacteriales; f__Flavobacteriaceae; g__Flavobacterium; s__unclassified_g__Flavobacterium
OTU386	0	0	0	0	0	0	1	0	0	0	0	0	0	1	0	95	0	0	0	0	0	0	0	0	2	0	0	0	0	10	k__Bacteria; p__Proteobacteria; c__Alphaproteobacteria; o__Rhizobiales; f__Rhizobiaceae; g__Allorhizobium-Neorhizobium-Pararhizobium-Rhizobium; s__Rhizobium_cellulosilyticum
OTU387	9	18	36	56	48	41	55	30	52	54	28	12	36	8	71	24	25	2	0	18	4	2	4	11	3	0	14	3	8	11	k__Bacteria; p__Proteobacteria; c__Gammaproteobacteria; o__Aeromonadales; f__Aeromonadaceae; g__Aeromonas; s__unclassified_g__Aeromonas
OTU388	0	6	4	0	0	0	20	0	6	8	0	0	7	0	14	32	5	0	2	1	0	2	1	4	5	0	3	0	0	0	k__Bacteria; p__Firmicutes; c__Bacilli; o__Bacillales; f__Staphylococcaceae; g__Staphylococcus; s__unclassified_g__Staphylococcus
OTU389	0	0	0	0	0	0	0	0	4	0	0	0	0	0	0	16	7	0	0	0	0	0	0	0	3	0	0	0	0	0	k__Bacteria; p__Bacteroidetes; c__Bacteroidia; o__Bacteroidales; f__Prevotellaceae; g__Prevotella; s__Prevotella_timonensis
OTU390	0	0	0	0	0	0	0	0	0	0	0	0	0	0	0	15	0	0	0	0	0	0	0	0	1	1	0	0	0	0	k__Bacteria; p__Firmicutes; c__Clostridia; o__Clostridiales; f__Lachnospiraceae; g__Lachnoclostridium_5; s__unclassified_g__Lachnoclostridium_5
OTU391	11	22	33	30	33	11	25	18	43	28	19	5	32	7	21	13	19	2	3	16	1	0	1	1	10	0	17	1	3	0	k__Bacteria; p__Proteobacteria; c__Alphaproteobacteria; o__Rhizobiales; f__Devosiaceae; g__Devosia; s__unclassified_g__Devosia
OTU392	0	6	0	2	3	0	0	0	0	11	0	2	0	0	9	69	0	1	1	1	0	0	1103	1	3	0	3	0	1	0	k__Bacteria; p__Proteobacteria; c__Gammaproteobacteria; o__Betaproteobacteriales; f__Burkholderiaceae; g__unclassified_f__Burkholderiaceae; s__unclassified_f__Burkholderiaceae
OTU393	0	0	0	0	0	0	0	0	0	0	0	0	0	1	0	31	0	2	0	0	0	0	1688	0	8	0	0	2	0	2	k__Bacteria; p__Proteobacteria; c__Gammaproteobacteria; o__Pseudomonadales; f__Pseudomonadaceae; g__Pseudomonas; s__Pseudomonas_nitroreducens
OTU394	0	0	3	0	0	0	0	1	0	8	0	0	0	0	6	11	0	3	75	4	0	2	0	0	1	0	0	0	0	0	k__Bacteria; p__Actinobacteria; c__Actinobacteria; o__Micrococcales; f__Brevibacteriaceae; g__Brevibacterium; s__Brevibacterium_iodinum
OTU395	0	0	0	0	0	0	0	0	0	0	0	0	0	0	0	4	0	6	0	0	0	0	2	0	0	0	1	0	5	0	k__Bacteria; p__Proteobacteria; c__Gammaproteobacteria; o__Pseudomonadales; f__Moraxellaceae; g__norank_f__Moraxellaceae; s__metagenome_g__norank_f__Moraxellaceae
OTU396	0	0	0	0	0	0	0	0	0	0	0	1	0	0	0	29	0	0	0	0	0	0	0	0	0	0	0	0	0	0	k__Bacteria; p__Actinobacteria; c__Actinobacteria; o__Kineosporiales; f__Kineosporiaceae; g__Quadrisphaera; s__uncultured_bacterium_g__Quadrisphaera
OTU397	0	0	0	0	0	0	0	0	0	0	0	0	0	0	0	6	0	0	0	0	0	0	0	0	0	0	0	0	0	0	k__Bacteria; p__Firmicutes; c__Clostridia; o__Clostridiales; f__Family_XI_o__Clostridiales; g__Sedimentibacter; s__unclassified_g__Sedimentibacter
OTU398	0	0	0	0	0	0	0	0	0	0	0	0	0	0	0	2	0	0	0	0	0	0	0	0	0	0	0	0	0	0	k__Bacteria; p__Firmicutes; c__Clostridia; o__Clostridiales; f__Ruminococcaceae; g__Ruminococcaceae_UCG-014; s__unclassified_g__Ruminococcaceae_UCG-014
OTU399	0	0	0	0	0	0	0	0	0	0	0	0	0	0	0	3	0	0	0	0	0	0	0	0	0	0	0	0	0	0	k__Bacteria; p__Bacteroidetes; c__Ignavibacteria; o__Kryptoniales; f__BSV26; g__norank_f__BSV26; s__uncultured_bacterium_g__norank_f__BSV26
OTU400	0	0	0	0	0	0	0	2	0	0	0	0	2	0	0	2	0	0	0	0	1	0	0	0	0	0	0	0	0	0	k__Bacteria; p__Proteobacteria; c__Alphaproteobacteria; o__Caulobacterales; f__Parvularculaceae; g__Amphiplicatus; s__uncultured_bacterium_g__Amphiplicatus
OTU401	0	0	0	0	0	0	0	0	0	0	0	0	0	0	0	3	0	0	0	0	0	0	0	0	0	0	0	0	0	0	k__Bacteria; p__Bacteroidetes; c__Bacteroidia; o__Bacteroidales; f__Prevotellaceae; g__Prevotella_1; s__uncultured_bacterium_g__Prevotella_1
OTU402	0	0	0	0	0	0	0	0	0	0	0	0	0	0	0	5	0	0	0	0	0	0	0	0	0	0	0	0	0	0	k__Bacteria; p__Actinobacteria; c__Actinobacteria; o__Frankiales; f__Nakamurellaceae; g__Nakamurella; s__unclassified_g__Nakamurella
OTU403	0	0	0	0	0	0	0	0	0	0	0	0	0	0	0	6	0	0	0	0	0	0	0	0	0	0	0	0	0	0	k__Bacteria; p__Acidobacteria; c__Acidobacteriia; o__Solibacterales; f__Solibacteraceae_Subgroup_3; g__Paludibaculum; s__uncultured_bacterium_g__Paludibaculum
OTU404	0	0	0	0	0	0	0	0	0	0	0	0	0	0	0	2	0	0	0	0	0	0	0	0	0	0	0	0	0	0	k__Bacteria; p__Acidobacteria; c__Acidobacteriia; o__Acidobacteriales; f__Acidobacteriaceae_Subgroup_1; g__unclassified_f__Acidobacteriaceae_Subgroup_1; s__unclassified_f__Acidobacteriaceae_Subgroup_1
OTU405	0	0	0	0	0	0	0	0	0	0	0	0	0	0	0	3	0	0	0	0	0	0	0	0	0	0	0	0	0	0	k__Bacteria; p__Firmicutes; c__Clostridia; o__Clostridiales; f__Lachnospiraceae; g__unclassified_f__Lachnospiraceae; s__unclassified_f__Lachnospiraceae
OTU406	0	0	0	0	0	0	0	0	0	0	0	0	0	0	0	3	0	0	0	0	0	0	0	0	0	0	0	0	0	0	k__Bacteria; p__Bacteroidetes; c__Bacteroidia; o__Bacteroidales; f__F082; g__norank_f__F082; s__unclassified_g__norank_f__F082
OTU407	0	0	0	0	0	0	0	0	0	0	0	0	0	0	0	7	0	0	0	0	0	0	0	0	0	0	0	0	0	0	k__Bacteria; p__Firmicutes; c__Clostridia; o__Clostridiales; f__Lachnospiraceae; g__Herbinix; s__uncultured_bacterium_g__Herbinix
OTU408	0	0	0	0	0	0	0	0	0	0	0	0	0	0	0	4	0	0	0	0	0	0	0	0	0	0	0	0	0	0	k__Bacteria; p__Firmicutes; c__Clostridia; o__Clostridiales; f__Family_XI_o__Clostridiales; g__Anaerococcus; s__unclassified_g__Anaerococcus
OTU409	0	0	0	0	0	0	0	0	0	0	0	0	0	0	0	5	0	0	0	0	0	0	0	0	0	0	0	0	0	0	k__Bacteria; p__Bacteroidetes; c__Bacteroidia; o__Bacteroidales; f__Bacteroidaceae; g__Bacteroides; s__uncultured_bacterium_g__Bacteroides
OTU410	0	0	0	0	0	0	0	0	0	0	0	0	0	0	0	24	0	0	0	0	0	0	0	0	0	0	0	0	0	0	k__Bacteria; p__Firmicutes; c__Clostridia; o__Clostridiales; f__Clostridiaceae_1; g__Clostridium_sensu_stricto_12; s__Clostridium_scatologenes
OTU411	0	0	0	0	0	0	0	0	0	0	0	0	0	0	0	2	0	0	0	0	0	0	0	0	0	0	0	0	0	0	k__Bacteria; p__Proteobacteria; c__Alphaproteobacteria; o__Acetobacterales; f__Acetobacteraceae; g__Craurococcus; s__uncultured_bacterium_g__Craurococcus
OTU412	0	0	0	0	0	0	0	0	0	0	0	0	0	0	0	20	0	0	0	0	0	0	0	0	0	0	0	0	0	0	k__Bacteria; p__Proteobacteria; c__Alphaproteobacteria; o__Rhodobacterales; f__Rhodobacteraceae; g__Rubellimicrobium; s__uncultured_bacterium_g__Rubellimicrobium
OTU413	0	0	0	0	0	0	0	0	0	0	0	0	0	0	0	25	0	0	0	0	0	0	0	0	0	0	0	0	0	0	k__Bacteria; p__Bacteroidetes; c__Bacteroidia; o__Bacteroidales; f__Prevotellaceae; g__Prevotella_1; s__unclassified_g__Prevotella_1
OTU414	0	0	0	0	0	0	0	0	0	0	0	0	0	0	0	3	0	0	0	0	0	0	0	0	0	0	0	0	0	0	k__Bacteria; p__Proteobacteria; c__Alphaproteobacteria; o__Acetobacterales; f__Acetobacteraceae; g__Roseomonas; s__unclassified_g__Roseomonas
OTU415	0	0	0	0	0	0	0	0	0	0	0	0	0	0	0	9	0	0	0	0	0	1	0	0	0	0	0	0	0	0	k__Bacteria; p__Proteobacteria; c__Gammaproteobacteria; o__Betaproteobacteriales; f__Methylophilaceae; g__Methylophilus; s__uncultured_bacterium_g__Methylophilus
OTU416	0	0	0	0	0	0	0	0	0	0	0	0	0	0	0	0	1	0	0	0	0	0	0	0	0	0	0	0	0	0	k__Bacteria; p__Firmicutes; c__Clostridia; o__Clostridiales; f__Peptococcaceae; g__Desulfosporosinus; s__unclassified_g__Desulfosporosinus
OTU417	0	0	0	0	0	0	0	0	0	0	0	0	0	0	0	0	4	0	0	0	0	0	0	0	0	0	0	0	0	0	k__Bacteria; p__Proteobacteria; c__Gammaproteobacteria; o__Diplorickettsiales; f__Diplorickettsiaceae; g__norank_f__Diplorickettsiaceae; s__uncultured_bacterium_g__norank_f__Diplorickettsiaceae
OTU418	0	0	0	0	0	0	0	0	0	0	0	0	0	0	0	0	11	0	0	0	0	0	0	0	0	0	0	0	0	0	k__Bacteria; p__Bacteroidetes; c__Ignavibacteria; o__OPB56; f__norank_o__OPB56; g__norank_o__OPB56; s__uncultured_bacterium_g__norank_o__OPB56
OTU419	0	0	0	0	0	0	0	0	0	0	0	0	0	0	0	0	2	0	0	0	0	0	0	0	0	0	2	0	0	0	k__Bacteria; p__Proteobacteria; c__Gammaproteobacteria; o__Betaproteobacteriales; f__Burkholderiaceae; g__Tepidimonas; s__uncultured_Tepidimonas_sp.
OTU420	0	0	3	0	0	0	0	0	0	2	0	0	0	0	0	3	4	0	0	0	0	0	0	0	0	0	0	0	0	0	k__Bacteria; p__Bacteroidetes; c__Bacteroidia; o__Flavobacteriales; f__Weeksellaceae; g__Empedobacter; s__Empedobacter_brevis_g__Empedobacter
OTU421	0	0	0	0	0	0	0	0	0	0	0	0	0	0	0	0	4	0	0	0	0	0	11	0	0	0	0	0	0	0	k__Bacteria; p__Proteobacteria; c__Alphaproteobacteria; o__Rhizobiales; f__Devosiaceae; g__Devosia; s__unclassified_g__Devosia
OTU422	0	0	0	0	0	0	0	0	0	0	0	0	0	0	0	0	5	0	0	0	0	0	0	6	0	0	0	0	0	0	k__Bacteria; p__unclassified_k__Bacteria; c__unclassified_k__norank_d__Bacteria; p__unclassified_k__Bacteria; p__unclassified_k__Bacteria; p__unclassified_k__Bacteria; p__unclassified_k__Bacteria
OTU423	0	0	0	0	0	0	0	0	0	0	0	0	0	0	0	0	11	0	0	0	0	0	0	0	0	0	1	0	0	0	k__Bacteria; p__Planctomycetes; c__Phycisphaerae; o__Phycisphaerales; f__Phycisphaeraceae; g__SM1A02; s__unclassified_g__SM1A02
OTU424	0	0	0	0	0	0	0	0	0	0	0	0	0	0	0	0	8	0	0	0	0	0	0	0	0	0	0	0	0	0	k__Bacteria; p__Proteobacteria; c__Alphaproteobacteria; o__Rhizobiales; f__Rhizobiaceae; g__Allorhizobium-Neorhizobium-Pararhizobium-Rhizobium; s__unclassified_g__Allorhizobium-Neorhizobium-Pararhizobium-Rhizobium
OTU425	0	0	0	0	0	0	0	0	0	0	0	0	0	0	0	0	27	0	0	0	0	0	0	0	0	0	0	0	1	1	k__Bacteria; p__Actinobacteria; c__Actinobacteria; o__Streptomycetales; f__Streptomycetaceae; g__Streptomyces; s__unclassified_g__Streptomyces
OTU426	0	0	0	0	0	0	0	0	0	0	0	0	0	0	0	0	2	0	1	0	0	0	1	0	0	0	0	0	0	0	k__Bacteria; p__Planctomycetes; c__Phycisphaerae; o__Phycisphaerales; f__Phycisphaeraceae; g__SM1A02; s__metagenome_g__SM1A02
OTU427	0	0	0	0	0	0	0	0	0	0	0	0	0	0	0	0	3	0	0	0	0	0	0	0	0	0	0	0	0	0	k__Bacteria; p__Proteobacteria; c__Gammaproteobacteria; o__unclassified_c__Gammaproteobacteria; f__unclassified_c__Gammaproteobacteria; g__unclassified_c__Gammaproteobacteria; s__unclassified_c__Gammaproteobacteria
OTU428	0	0	0	0	0	0	0	0	0	0	0	0	0	0	0	0	14	0	0	0	0	0	0	0	0	0	0	0	0	0	k__Bacteria; p__Actinobacteria; c__Actinobacteria; o__Catenulisporales; f__Catenulisporaceae; g__Catenulispora; s__Catenulispora_acidiphila_DSM_44928
OTU429	0	0	0	0	0	0	0	0	0	0	0	0	0	0	0	0	18	0	0	0	0	0	0	0	0	5	0	0	0	0	k__Bacteria; p__Proteobacteria; c__Gammaproteobacteria; o__Betaproteobacteriales; f__Burkholderiaceae; g__unclassified_f__Burkholderiaceae; s__unclassified_f__Burkholderiaceae
OTU430	0	1	10	0	0	11	0	0	0	0	0	0	0	1	0	0	134	9	1	10	0	0	3	91	2	0	3	46	28	13	k__Bacteria; p__Actinobacteria; c__Actinobacteria; o__Corynebacteriales; f__Mycobacteriaceae; g__Mycobacterium; s__Mycobacterium_kansasii
OTU431	0	0	0	0	0	0	0	0	0	0	0	0	0	0	0	0	135	361	17	101	1	0	13	11	1	0	13	1	91	0	k__Bacteria; p__Actinobacteria; c__Actinobacteria; o__Pseudonocardiales; f__Pseudonocardiaceae; g__unclassified_f__Pseudonocardiaceae; s__unclassified_f__Pseudonocardiaceae
OTU432	0	0	1	0	0	1	2	1	3	2	1	0	0	0	1	2	1	0	0	0	0	0	0	0	1	0	2	0	0	0	k__Bacteria; p__Proteobacteria; c__Alphaproteobacteria; o__unclassified_c__Alphaproteobacteria; f__unclassified_c__Alphaproteobacteria; g__unclassified_c__Alphaproteobacteria; s__unclassified_c__Alphaproteobacteria
OTU433	0	0	1	0	0	0	0	0	0	0	0	0	0	0	0	0	4	3799	257	2172	0	0	111	5	9	0	164	0	391	4	k__Bacteria; p__Actinobacteria; c__Actinobacteria; o__Pseudonocardiales; f__Pseudonocardiaceae; g__Lechevalieria; s__Lechevalieria_aerocolonigenes
OTU434	0	0	0	0	0	0	0	0	0	0	0	0	0	0	0	0	0	2	0	0	0	1	0	0	0	0	1	0	0	3	k__Bacteria; p__Actinobacteria; c__Actinobacteria; o__Gaiellales; f__norank_o__Gaiellales; g__norank_o__Gaiellales; s__unclassified_g__norank_o__Gaiellales
OTU435	0	0	0	0	0	5	0	0	0	0	0	0	0	0	0	22	0	865	135	30	6	0	44	0	4	0	78	0	9	1	k__Bacteria; p__Actinobacteria; c__Actinobacteria; o__Pseudonocardiales; f__Pseudonocardiaceae; g__Lechevalieria; s__unclassified_g__Lechevalieria
OTU436	0	0	0	0	0	0	0	0	0	0	0	0	0	0	0	0	0	2	0	0	0	0	0	0	0	0	0	0	0	0	k__Bacteria; p__Firmicutes; c__Clostridia; o__Clostridiales; f__Family_XVIII; g__Symbiobacterium; s__unclassified_g__Symbiobacterium
OTU437	0	0	0	0	0	0	0	0	0	0	0	0	0	0	0	0	0	1	0	0	0	0	1	0	7	0	0	0	0	0	k__Bacteria; p__Actinobacteria; c__Actinobacteria; o__Microtrichales; f__Ilumatobacteraceae; g__Ilumatobacter; s__unclassified_g__Ilumatobacter
OTU438	0	0	0	0	0	0	0	0	0	0	0	0	0	0	0	0	0	2	0	0	0	0	0	0	0	0	0	0	0	0	k__Bacteria; p__Firmicutes; c__Bacilli; o__Bacillales; f__unclassified_o__Bacillales; g__unclassified_o__Bacillales; s__unclassified_o__Bacillales
OTU439	0	0	0	0	0	0	0	0	0	0	0	0	0	0	0	0	0	10	0	0	0	0	0	0	0	0	0	0	0	0	k__Bacteria; p__unclassified_k__Bacteria; c__unclassified_k__norank_d__Bacteria; p__unclassified_k__Bacteria; p__unclassified_k__Bacteria; p__unclassified_k__Bacteria; p__unclassified_k__Bacteria
OTU440	0	0	0	0	0	0	0	0	0	0	0	0	0	0	0	0	0	108	0	0	0	0	0	0	0	0	0	0	0	0	k__Bacteria; p__Proteobacteria; c__Gammaproteobacteria; o__Betaproteobacteriales; f__Burkholderiaceae; g__unclassified_f__Burkholderiaceae; s__unclassified_f__Burkholderiaceae
OTU441	0	0	0	0	0	0	0	0	0	0	0	0	0	0	0	0	0	4	0	0	0	0	0	0	0	0	0	0	0	0	k__Bacteria; p__Firmicutes; c__Clostridia; o__Clostridiales; f__Family_XVIII; g__norank_f__Family_XVIII; s__unclassified_g__norank_f__Family_XVIII
OTU442	0	0	0	0	0	0	0	0	0	0	0	0	0	0	0	0	0	1	0	0	0	0	0	0	0	0	0	0	0	0	k__Bacteria; p__Proteobacteria; c__unclassified_p__Proteobacteria; o__unclassified_p__Proteobacteria; f__unclassified_p__Proteobacteria; g__unclassified_p__Proteobacteria; s__unclassified_p__Proteobacteria
OTU443	0	0	0	0	0	0	0	0	0	0	0	0	0	0	0	0	0	6	0	0	0	0	0	0	0	0	0	0	0	0	k__Bacteria; p__Chlamydiae; c__Chlamydiae; o__Chlamydiales; f__cvE6; g__norank_f__cvE6; s__uncultured_Chlamydia_sp._g__norank_f__cvE6
OTU444	0	0	0	0	0	0	0	0	0	0	0	0	0	0	0	0	0	3	0	0	0	0	1	0	4	0	0	0	0	0	k__Bacteria; p__Proteobacteria; c__Gammaproteobacteria; o__Betaproteobacteriales; f__Nitrosomonadaceae; g__MND1; s__uncultured_Burkholderiales_bacterium_g__MND1
OTU445	0	0	0	0	0	0	0	0	0	0	0	0	0	0	0	0	0	4	1	0	0	0	0	0	0	0	0	0	0	0	k__Bacteria; p__Firmicutes; c__Bacilli; o__Bacillales; f__Alicyclobacillaceae; g__Alicyclobacillus; s__unclassified_g__Alicyclobacillus
OTU446	0	0	0	0	0	0	0	0	0	0	0	0	0	0	0	0	0	2	0	2	0	0	0	0	0	0	0	0	0	0	k__Bacteria; p__Bacteroidetes; c__Bacteroidia; o__Sphingobacteriales; f__env.OPS_17; g__norank_f__env.OPS_17; s__uncultured_Bacteroidetes_bacterium_g__norank_f__env.OPS_17
OTU447	0	0	0	0	0	0	0	0	0	0	0	0	0	0	0	0	0	56	0	0	0	0	59	0	0	0	0	0	0	0	k__Bacteria; p__Bacteroidetes; c__Bacteroidia; o__Cytophagales; f__Microscillaceae; g__Ohtaekwangia; s__uncultured_bacterium_g__Ohtaekwangia
OTU448	0	0	0	0	0	0	0	0	0	0	0	0	0	0	0	0	0	3	0	0	0	0	0	0	2	0	0	0	0	0	k__Bacteria; p__Proteobacteria; c__Alphaproteobacteria; o__Rhizobiales; f__D05-2; g__norank_f__D05-2; s__uncultured_bacterium_g__norank_f__D05-2
OTU449	0	0	0	0	0	0	0	0	0	0	0	0	0	0	0	0	0	4	0	0	0	0	0	0	2	0	0	0	0	0	k__Bacteria; p__Firmicutes; c__Bacilli; o__Bacillales; f__Paenibacillaceae; g__Brevibacillus; s__Brevibacillus_reuszeri
OTU450	0	0	0	0	0	0	0	0	0	0	0	0	0	0	0	0	0	2	0	0	0	0	0	0	0	0	0	0	0	0	k__Bacteria; p__Firmicutes; c__Bacilli; o__Bacillales; f__Thermoactinomycetaceae; g__norank_f__Thermoactinomycetaceae; s__uncultured_compost_bacterium_g__norank_f__Thermoactinomycetaceae
OTU451	0	0	0	0	0	0	0	0	0	0	0	0	0	0	0	0	0	4	0	0	0	0	0	0	0	0	0	0	0	1	k__Bacteria; p__Firmicutes; c__Bacilli; o__Bacillales; f__Bacillaceae; g__Bacillus; s__Bacillus_gibsonii
OTU452	0	0	0	0	0	0	0	0	0	0	0	0	0	0	0	0	0	3	0	0	0	0	0	0	0	0	0	0	0	0	k__Bacteria; p__Bacteroidetes; c__Bacteroidia; o__Bacteroidales; f__Prevotellaceae; g__Prevotella_7; s__unclassified_g__Prevotella_7
OTU453	2	0	0	0	0	0	0	0	0	0	0	0	0	0	0	0	0	8	4	0	0	0	3	0	1	0	0	0	0	1	k__Bacteria; p__Proteobacteria; c__Alphaproteobacteria; o__Rhizobiales; f__Devosiaceae; g__Devosia; s__unclassified_g__Devosia
OTU454	0	0	0	0	0	0	0	0	0	0	0	0	0	0	0	0	0	4	0	0	0	0	188	0	0	0	0	0	1	0	k__Bacteria; p__Proteobacteria; c__Gammaproteobacteria; o__Steroidobacterales; f__Steroidobacteraceae; g__unclassified_f__Steroidobacteraceae; s__unclassified_f__Steroidobacteraceae
OTU455	0	0	0	0	0	0	0	0	0	0	0	0	0	0	0	0	0	2	0	0	0	0	0	0	0	0	0	0	0	0	k__Bacteria; p__Proteobacteria; c__Deltaproteobacteria; o__Oligoflexales; f__0319-6G20; g__norank_f__0319-6G20; s__unclassified_g__norank_f__0319-6G20
OTU457	0	0	0	0	0	0	0	0	0	0	0	0	0	0	0	0	3	5	0	3	0	0	157	2	0	0	79	0	0	0	k__Bacteria; p__Proteobacteria; c__Gammaproteobacteria; o__Betaproteobacteriales; f__Burkholderiaceae; g__unclassified_f__Burkholderiaceae; s__unclassified_f__Burkholderiaceae
OTU458	0	0	0	0	0	0	0	0	0	0	0	0	0	0	0	0	0	7	0	0	0	0	74	0	0	0	2	0	0	0	k__Bacteria; p__Spirochaetes; c__Spirochaetia; o__Spirochaetales; f__Spirochaetaceae; g__Salinispira; s__metagenome_g__Salinispira
OTU459	0	0	0	0	0	0	0	0	0	0	0	0	0	0	0	0	0	8	34	0	1	0	0	1	12	0	38	2	10	1	k__Bacteria; p__Actinobacteria; c__Actinobacteria; o__Micromonosporales; f__Micromonosporaceae; g__Actinoplanes; s__unclassified_g__Actinoplanes
OTU460	0	0	6	0	0	0	0	0	0	3	0	0	0	0	0	4	0	0	1	2	0	0	0	0	0	0	0	0	0	1	k__Bacteria; p__Actinobacteria; c__Actinobacteria; o__Propionibacteriales; f__Nocardioidaceae; g__Marmoricola; s__unclassified_g__Marmoricola
OTU461	0	1	2	0	0	0	0	0	0	0	0	0	0	0	1	4	0	1	1464	5	0	0	0	4	0	0	5	0	35	7	k__Bacteria; p__Proteobacteria; c__Gammaproteobacteria; o__Enterobacteriales; f__Enterobacteriaceae; g__Citrobacter; s__Citrobacter_amalonaticus
OTU462	0	0	0	0	0	0	0	0	0	0	0	0	0	0	0	0	0	2	75	0	0	0	0	0	0	0	14	0	0	11	k__Bacteria; p__Actinobacteria; c__Actinobacteria; o__Micromonosporales; f__Micromonosporaceae; g__Virgisporangium; s__Virgisporangium_aliadipatigenens
OTU463	0	0	0	0	0	0	0	0	0	0	0	0	0	0	0	0	0	0	17	0	0	0	0	0	0	0	0	0	0	0	k__Bacteria; p__Actinobacteria; c__Actinobacteria; o__Streptomycetales; f__Streptomycetaceae; g__Streptomyces; s__unclassified_g__Streptomyces
OTU464	0	0	1	0	0	0	0	0	0	0	0	0	0	0	0	0	0	0	0	0	0	0	0	0	0	0	0	0	0	0	k__Bacteria; p__Firmicutes; c__Bacilli; o__Bacillales; f__Alicyclobacillaceae; g__Tumebacillus; s__unclassified_g__Tumebacillus
OTU465	13	10	0	0	0	22	0	0	13	0	0	4	1	1	0	0	0	0	118	2	0	0	0	0	2	0	0	0	0	0	k__Bacteria; p__Actinobacteria; c__Actinobacteria; o__Micrococcales; f__Micrococcaceae; g__Paenarthrobacter; s__Paenarthrobacter_nicotinovorans_g__Paenarthrobacter
OTU466	0	0	0	0	0	0	0	0	0	0	0	0	0	0	0	0	0	0	3	0	0	0	0	0	0	0	0	0	0	0	k__Bacteria; p__Firmicutes; c__Bacilli; o__Bacillales; f__Thermoactinomycetaceae; g__Thermoactinomyces; s__Thermoactinomyces_daqus
OTU467	0	3	0	0	0	1	0	0	0	0	0	0	0	0	0	0	0	0	13	0	0	0	0	0	0	0	0	0	1	0	k__Bacteria; p__Actinobacteria; c__Actinobacteria; o__Streptomycetales; f__Streptomycetaceae; g__Streptomyces; s__unclassified_g__Streptomyces
OTU468	0	0	0	0	0	0	0	0	0	0	0	0	0	0	0	0	0	0	55	0	0	0	0	0	0	0	0	0	1	0	k__Bacteria; p__Proteobacteria; c__Gammaproteobacteria; o__Enterobacteriales; f__Enterobacteriaceae; g__unclassified_f__Enterobacteriaceae; s__unclassified_f__Enterobacteriaceae
OTU469	1	0	0	0	0	2	0	0	0	0	0	0	0	0	0	0	0	0	6	0	0	0	0	0	0	0	0	0	0	0	k__Bacteria; p__Actinobacteria; c__Actinobacteria; o__Propionibacteriales; f__Nocardioidaceae; g__Nocardioides; s__Nocardioides_szechwanensis
OTU470	10	1	27	0	0	8	2	2	28	0	0	2	0	0	1	0	0	0	7	20	2	1	3	5	62	0	16	0	7	4	k__Bacteria; p__Proteobacteria; c__Alphaproteobacteria; o__Sphingomonadales; f__Sphingomonadaceae; g__Altererythrobacter; s__Altererythrobacter_sp.
OTU471	0	0	0	0	0	0	0	0	0	0	0	0	0	0	0	0	0	0	0	4	0	0	0	0	0	0	0	0	0	0	k__Bacteria; p__Actinobacteria; c__Actinobacteria; o__Frankiales; f__unclassified_o__Frankiales; g__unclassified_o__Frankiales; s__unclassified_o__Frankiales
OTU472	0	0	0	0	0	0	0	0	0	0	0	0	0	0	0	0	0	0	0	6	0	0	0	0	0	0	0	0	0	0	k__Bacteria; p__Proteobacteria; c__Deltaproteobacteria; o__Oligoflexales; f__0319-6G20; g__norank_f__0319-6G20; s__uncultured_bacterium_g__norank_f__0319-6G20
OTU473	0	1	0	0	0	0	0	0	0	0	0	0	0	0	0	0	0	0	0	2	0	0	0	0	0	0	0	0	0	0	k__Bacteria; p__Chlamydiae; c__Chlamydiae; o__Chlamydiales; f__Parachlamydiaceae; g__Candidatus_Protochlamydia; s__metagenome_g__Candidatus_Protochlamydia
OTU474	0	0	0	0	0	0	0	0	0	0	0	0	0	0	0	0	0	0	0	3	0	0	0	0	0	0	0	0	0	0	k__Bacteria; p__Bacteroidetes; c__Bacteroidia; o__Cytophagales; f__Microscillaceae; g__norank_f__Microscillaceae; s__unclassified_g__norank_f__Microscillaceae
OTU475	0	0	0	0	0	0	0	0	0	0	0	0	0	0	0	0	0	0	0	10	0	0	0	0	0	0	0	0	0	0	k__Bacteria; p__Firmicutes; c__Bacilli; o__Bacillales; f__Family_XII_o__Bacillales; g__Exiguobacterium; s__unclassified_g__Exiguobacterium
OTU476	0	0	0	0	0	0	0	0	0	0	0	0	0	0	0	0	0	0	0	0	0	0	0	2	0	0	0	0	0	0	k__Bacteria; p__Actinobacteria; c__Actinobacteria; o__Solirubrobacterales; f__Solirubrobacteraceae; g__unclassified_f__Solirubrobacteraceae; s__unclassified_f__Solirubrobacteraceae
OTU477	0	0	0	0	0	0	0	0	0	0	0	0	0	0	0	0	0	0	0	133	0	0	0	0	0	0	0	0	0	0	k__Bacteria; p__Proteobacteria; c__Gammaproteobacteria; o__Betaproteobacteriales; f__Burkholderiaceae; g__unclassified_f__Burkholderiaceae; s__unclassified_f__Burkholderiaceae
OTU478	0	0	0	0	0	0	0	0	0	0	0	0	0	0	0	0	0	0	0	2	0	0	0	0	0	0	0	0	0	1	k__Bacteria; p__Actinobacteria; c__Actinobacteria; o__Microtrichales; f__Iamiaceae; g__Iamia; s__unclassified_g__Iamia
OTU479	0	0	0	0	0	0	0	0	0	0	0	0	0	0	0	0	0	0	0	6	0	0	0	0	0	0	0	0	0	0	k__Bacteria; p__unclassified_k__Bacteria; c__unclassified_k__norank_d__Bacteria; p__unclassified_k__Bacteria; p__unclassified_k__Bacteria; p__unclassified_k__Bacteria; p__unclassified_k__Bacteria
OTU480	0	0	0	0	0	0	0	0	0	0	0	0	0	0	0	0	0	0	0	1186	0	0	0	0	0	0	0	0	0	0	k__Bacteria; p__unclassified_k__Bacteria; c__unclassified_k__norank_d__Bacteria; p__unclassified_k__Bacteria; p__unclassified_k__Bacteria; p__unclassified_k__Bacteria; p__unclassified_k__Bacteria
OTU481	0	0	0	0	0	0	0	0	0	0	0	0	0	0	0	0	0	0	0	9	0	0	0	0	0	0	0	0	0	0	k__Bacteria; p__unclassified_k__Bacteria; c__unclassified_k__norank_d__Bacteria; p__unclassified_k__Bacteria; p__unclassified_k__Bacteria; p__unclassified_k__Bacteria; p__unclassified_k__Bacteria
OTU482	0	0	0	0	0	0	0	0	0	0	0	0	0	0	0	0	0	0	0	2	0	0	0	0	0	0	0	0	0	0	k__Bacteria; p__Bacteroidetes; c__Bacteroidia; o__Chitinophagales; f__Saprospiraceae; g__norank_f__Saprospiraceae; s__unclassified_g__norank_f__Saprospiraceae
OTU483	0	0	24	0	0	0	1	1	0	0	0	0	6	0	5	5	5	0	3	0	0	0	0	1	0	0	0	0	1	7	k__Bacteria; p__Proteobacteria; c__Gammaproteobacteria; o__Betaproteobacteriales; f__Burkholderiaceae; g__unclassified_f__Burkholderiaceae; s__unclassified_f__Burkholderiaceae
OTU484	0	0	0	0	0	0	0	0	0	0	0	0	0	0	0	0	0	2	0	2	0	0	0	0	0	0	1	0	0	0	k__Bacteria; p__Actinobacteria; c__Actinobacteria; o__Streptosporangiales; f__Thermomonosporaceae; g__Actinocorallia; s__metagenome_g__Actinocorallia
OTU485	0	0	0	0	0	0	0	0	0	0	0	0	0	0	0	0	0	0	0	1	0	0	0	0	0	0	0	0	0	0	k__Bacteria; p__Proteobacteria; c__Alphaproteobacteria; o__Rhizobiales; f__Beijerinckiaceae; g__Methylobacterium; s__Methylobacterium_variabile
OTU486	0	0	0	0	0	0	0	0	0	0	0	0	0	0	0	0	0	0	0	246	0	0	0	0	0	0	0	0	0	0	k__Bacteria; p__Proteobacteria; c__Gammaproteobacteria; o__Betaproteobacteriales; f__Burkholderiaceae; g__unclassified_f__Burkholderiaceae; s__unclassified_f__Burkholderiaceae
OTU487	0	0	0	0	0	0	0	0	0	0	0	0	0	0	0	0	0	0	0	1	0	0	0	0	0	0	0	0	0	0	k__Bacteria; p__Dependentiae; c__Babeliae; o__Babeliales; f__Vermiphilaceae; g__norank_f__Vermiphilaceae; s__uncultured_bacterium_g__norank_f__Vermiphilaceae
OTU488	0	0	0	0	0	0	0	0	0	0	0	0	0	0	0	0	0	4	0	3	0	0	1	0	1	0	0	0	0	0	k__Bacteria; p__Actinobacteria; c__Actinobacteria; o__Corynebacteriales; f__Corynebacteriaceae; g__Corynebacterium; s__Corynebacterium_sp._WW3
OTU489	0	0	0	0	0	0	0	0	0	0	0	0	0	0	0	0	0	0	0	7	0	0	0	0	0	0	2	0	0	0	k__Bacteria; p__Proteobacteria; c__Gammaproteobacteria; o__Diplorickettsiales; f__Diplorickettsiaceae; g__unclassified_f__Diplorickettsiaceae; s__unclassified_f__Diplorickettsiaceae
OTU490	0	0	0	0	0	0	0	0	0	0	0	0	0	0	0	0	0	0	0	5	0	0	0	0	0	0	0	0	0	0	k__Bacteria; p__Proteobacteria; c__Gammaproteobacteria; o__Betaproteobacteriales; f__Neisseriaceae; g__Neisseria; s__unclassified_g__Neisseria
OTU491	3	0	2	9	1	0	1	0	0	1	3	0	1	0	5	0	3	0	0	8	7908	0	0	0	1	1	11	76	186	0	k__Bacteria; p__Proteobacteria; c__Gammaproteobacteria; o__Betaproteobacteriales; f__Burkholderiaceae; g__Burkholderia-Caballeronia-Paraburkholderia; s__Paraburkholderia_caribensis
OTU492	0	0	0	0	0	0	0	0	0	0	0	0	0	0	0	0	0	0	0	0	8	0	0	0	0	1	0	0	0	0	k__Bacteria; p__Proteobacteria; c__Gammaproteobacteria; o__unclassified_c__Gammaproteobacteria; f__unclassified_c__Gammaproteobacteria; g__unclassified_c__Gammaproteobacteria; s__unclassified_c__Gammaproteobacteria
OTU493	0	0	0	0	0	0	0	0	0	0	0	0	0	0	0	0	0	0	0	0	48	0	0	0	0	0	0	0	0	0	k__Bacteria; p__Proteobacteria; c__Gammaproteobacteria; o__Betaproteobacteriales; f__Burkholderiaceae; g__Burkholderia-Caballeronia-Paraburkholderia; s__unclassified_g__Burkholderia-Caballeronia-Paraburkholderia
OTU494	0	0	0	0	0	0	0	0	0	0	0	0	0	0	0	0	0	0	0	0	0	0	2	0	0	0	0	0	0	0	k__Bacteria; p__Proteobacteria; c__Alphaproteobacteria; o__Rhizobiales; f__Xanthobacteraceae; g__norank_f__Xanthobacteraceae; s__uncultured_Bradyrhizobiaceae_bacterium_g__norank_f__Xanthobacteraceae
OTU495	0	0	0	0	0	5	0	0	0	15	0	0	0	0	0	0	4	1	2	0	0	1	1	0	3	0	7	0	1	62	k__Bacteria; p__Firmicutes; c__Bacilli; o__Bacillales; f__Bacillaceae; g__Bacillus; s__unclassified_g__Bacillus
OTU496	0	0	0	0	0	0	0	0	0	0	0	0	0	0	0	0	0	0	0	0	0	1	0	0	0	0	0	0	0	0	k__Bacteria; p__unclassified_k__Bacteria; c__unclassified_k__norank_d__Bacteria; p__unclassified_k__Bacteria; p__unclassified_k__Bacteria; p__unclassified_k__Bacteria; p__unclassified_k__Bacteria
OTU498	0	0	0	0	0	0	0	0	0	0	0	0	0	0	0	0	0	0	0	0	0	0	0	0	0	0	0	1	0	0	k__Bacteria; p__Acidobacteria; c__Acidobacteriia; o__Acidobacteriales; f__norank_o__Acidobacteriales; g__norank_o__Acidobacteriales; s__uncultured_Acidobacteria_bacterium_g__norank_o__Acidobacteriales
OTU499	0	0	0	0	0	0	0	0	0	0	0	0	0	0	0	0	0	0	0	0	0	1	0	0	0	0	0	0	0	0	k__Bacteria; p__Proteobacteria; c__Alphaproteobacteria; o__Rhodobacterales; f__Rhodobacteraceae; g__Paracoccus; s__Paracoccus_sp._LH8
OTU500	0	9	0	0	0	0	8	0	0	0	0	0	0	0	0	0	0	0	0	0	0	1	0	0	0	0	0	0	0	0	k__Bacteria; p__Proteobacteria; c__Alphaproteobacteria; o__Azospirillales; f__Azospirillaceae; g__Azospirillum; s__Azospirillum_brasilense
OTU501	0	0	0	0	0	0	0	5	0	0	0	0	0	3	0	0	0	0	0	0	0	0	0	0	1	0	0	0	0	0	k__Bacteria; p__Proteobacteria; c__Alphaproteobacteria; o__Rhizobiales; f__Beijerinckiaceae; g__1174-901-12; s__unclassified_g__1174-901-12
OTU502	0	0	0	0	0	0	0	0	0	0	0	0	0	0	0	0	0	0	0	0	0	1	0	0	0	0	0	0	0	0	k__Bacteria; p__Proteobacteria; c__Gammaproteobacteria; o__Betaproteobacteriales; f__Burkholderiaceae; g__unclassified_f__Burkholderiaceae; s__unclassified_f__Burkholderiaceae
OTU503	0	0	0	0	0	0	0	0	0	0	0	0	0	0	0	0	0	0	0	0	0	2	0	0	0	0	0	0	0	0	k__Bacteria; p__Actinobacteria; c__Actinobacteria; o__Gaiellales; f__Gaiellaceae; g__Gaiella; s__uncultured_Conexibacter_sp._g__Gaiella
OTU504	0	0	0	0	0	0	0	0	0	0	0	0	0	0	0	0	0	0	0	0	0	2	0	0	0	0	0	0	0	0	k__Bacteria; p__Proteobacteria; c__Alphaproteobacteria; o__Rhizobiales; f__Labraceae; g__Labrys; s__Labrys_wisconsinensis
OTU508	0	0	0	0	0	0	0	0	0	0	0	0	0	0	0	0	0	0	0	0	0	1	0	2	0	0	0	0	0	0	k__Bacteria; p__Actinobacteria; c__Actinobacteria; o__Corynebacteriales; f__Corynebacteriaceae; g__Corynebacterium_1; s__Corynebacterium_jeikeium_K411
OTU509	0	0	0	0	0	3	0	0	0	0	0	0	0	0	0	0	0	0	0	4	0	0	0	0	0	0	0	0	0	0	k__Bacteria; p__Gemmatimonadetes; c__Gemmatimonadetes; o__Gemmatimonadales; f__Gemmatimonadaceae; g__unclassified_f__Gemmatimonadaceae; s__unclassified_f__Gemmatimonadaceae
OTU511	0	0	0	0	0	0	0	0	0	0	0	0	0	0	0	0	0	0	0	2	1	2	1	0	5	0	2	2	0	6	k__Bacteria; p__Proteobacteria; c__Alphaproteobacteria; o__Rhizobiales; f__Xanthobacteraceae; g__norank_f__Xanthobacteraceae; s__Rhodoplanes_sp._Z2-YC6860
OTU513	0	0	0	0	0	0	0	0	0	0	0	0	0	0	0	0	0	2	0	2	0	0	0	0	1	0	0	1	0	0	k__Bacteria; p__Proteobacteria; c__Alphaproteobacteria; o__Rhizobiales; f__Methyloligellaceae; g__norank_f__Methyloligellaceae; s__metagenome_g__norank_f__Methyloligellaceae
OTU516	0	0	0	0	0	0	0	0	0	0	0	0	0	0	0	0	0	0	0	0	0	0	0	0	0	0	2	0	0	0	k__Bacteria; p__Actinobacteria; c__Actinobacteria; o__Frankiales; f__Frankiaceae; g__Jatrophihabitans; s__unclassified_g__Jatrophihabitans
OTU517	0	0	0	0	0	0	0	0	0	0	0	0	0	0	0	0	0	0	0	0	0	1	0	0	0	0	0	6	0	0	k__Bacteria; p__Proteobacteria; c__unclassified_p__Proteobacteria; o__unclassified_p__Proteobacteria; f__unclassified_p__Proteobacteria; g__unclassified_p__Proteobacteria; s__unclassified_p__Proteobacteria
OTU518	0	0	0	0	0	0	0	0	0	0	0	0	0	0	0	0	0	0	0	0	0	84	0	0	0	0	0	13	0	0	k__Bacteria; p__Proteobacteria; c__Gammaproteobacteria; o__Betaproteobacteriales; f__Burkholderiaceae; g__Herminiimonas; s__uncultured_bacterium_g__Herminiimonas
OTU519	1	1	8	2	8	17	11	0	16	13	13	1	0	1	5	10	8	1	0	8	0	0	3	2	0	0	5	0	4	0	k__Bacteria; p__Proteobacteria; c__Alphaproteobacteria; o__Sphingomonadales; f__Sphingomonadaceae; g__Sphingomonas; s__unclassified_g__Sphingomonas
OTU520	5	20	10	10	25	36	11	11	29	11	20	6	14	3	7	32	24	36	1	10	1	8109	6	1	2	2	14	6370	4	28	k__Bacteria; p__Proteobacteria; c__Gammaproteobacteria; o__Pseudomonadales; f__Pseudomonadaceae; g__Pseudomonas; s__Pseudomonas_protegens
OTU521	0	0	0	0	0	0	0	0	0	0	0	0	0	0	0	0	0	0	0	0	0	0	8	0	0	0	0	0	0	0	k__Bacteria; p__Proteobacteria; c__Gammaproteobacteria; o__Steroidobacterales; f__Steroidobacteraceae; g__unclassified_f__Steroidobacteraceae; s__unclassified_f__Steroidobacteraceae
OTU522	0	0	0	0	0	0	0	0	0	0	0	0	0	0	0	0	0	0	0	0	0	0	3	0	0	0	0	0	0	0	k__Bacteria; p__Bacteroidetes; c__Bacteroidia; o__Bacteroidales; f__Paludibacteraceae; g__Paludibacter; s__uncultured_bacterium_g__Paludibacter
OTU523	0	0	0	0	0	0	0	0	0	0	0	0	0	0	0	0	0	6	0	0	0	0	14	0	0	0	0	0	0	0	k__Bacteria; p__Bacteroidetes; c__Bacteroidia; o__Bacteroidales; f__Dysgonomonadaceae; g__Proteiniphilum; s__unclassified_g__Proteiniphilum
OTU524	0	0	0	0	0	0	0	0	0	0	0	0	0	0	0	0	0	0	0	0	0	0	101	0	0	0	0	0	0	0	k__Bacteria; p__Proteobacteria; c__Gammaproteobacteria; o__Betaproteobacteriales; f__Rhodocyclaceae; g__Azospira; s__unclassified_g__Azospira
OTU525	0	0	0	0	0	0	0	0	0	0	0	0	0	0	0	0	0	0	0	0	0	0	3	0	0	0	0	0	0	0	k__Bacteria; p__Dependentiae; c__Babeliae; o__Babeliales; f__Vermiphilaceae; g__norank_f__Vermiphilaceae; s__uncultured_bacterium_g__norank_f__Vermiphilaceae
OTU526	0	0	0	0	0	0	0	0	0	0	0	0	0	0	0	0	0	0	0	0	0	0	3	0	0	0	0	0	0	0	k__Bacteria; p__Chlamydiae; c__Chlamydiae; o__Chlamydiales; f__cvE6; g__norank_f__cvE6; s__uncultured_bacterium_g__norank_f__cvE6
OTU527	0	0	0	0	0	0	0	0	0	0	0	0	0	0	0	0	0	4	0	0	0	0	1	0	0	0	0	0	0	0	k__Bacteria; p__Proteobacteria; c__Alphaproteobacteria; o__Rhodospirillales; f__Rhodospirillaceae; g__Candidatus_Riegeria; s__uncultured_bacterium_g__Candidatus_Riegeria
OTU528	0	0	0	0	0	0	0	0	0	0	0	0	0	0	0	0	0	0	0	0	0	0	14	0	0	0	0	0	0	0	k__Bacteria; p__Chlamydiae; c__Chlamydiae; o__Chlamydiales; f__Simkaniaceae; g__norank_f__Simkaniaceae; s__uncultured_bacterium_g__norank_f__Simkaniaceae
OTU529	0	0	0	0	0	0	0	0	0	0	0	0	0	0	0	0	0	0	0	0	0	0	3	0	84	0	3	0	0	0	k__Bacteria; p__Proteobacteria; c__Gammaproteobacteria; o__Gammaproteobacteria_Incertae_Sedis; f__unclassified_o__Gammaproteobacteria_Incertae_Sedis; g__Acidibacter; s__uncultured_proteobacterium_g__Acidibacter
OTU530	0	0	0	0	0	0	0	0	0	0	0	0	0	0	0	0	0	0	0	0	0	0	8	0	0	0	0	0	0	0	k__Bacteria; p__Proteobacteria; c__Alphaproteobacteria; o__Rhodospirillales; f__norank_o__Rhodospirillales; g__norank_o__Rhodospirillales; s__unclassified_g__norank_o__Rhodospirillales
OTU531	0	0	0	0	0	0	0	0	0	0	0	0	0	0	0	0	0	0	0	0	0	0	5	0	0	0	0	0	0	0	k__Bacteria; p__Dependentiae; c__Babeliae; o__Babeliales; f__Vermiphilaceae; g__norank_f__Vermiphilaceae; s__uncultured_bacterium_g__norank_f__Vermiphilaceae
OTU532	0	0	0	0	0	0	0	0	0	0	0	0	0	0	0	0	0	0	0	0	0	0	262	0	0	0	0	0	0	0	k__Bacteria; p__Chlamydiae; c__Chlamydiae; o__Chlamydiales; f__cvE6; g__norank_f__cvE6; s__uncultured_bacterium_g__norank_f__cvE6
OTU533	0	0	0	0	0	0	0	0	0	0	0	0	0	0	0	0	0	0	0	0	0	0	19	0	0	0	0	0	0	0	k__Bacteria; p__Proteobacteria; c__Alphaproteobacteria; o__Sneathiellales; f__Sneathiellaceae; g__Ferrovibrio; s__uncultured_bacterium_g__Ferrovibrio
OTU534	0	0	0	0	0	0	0	0	0	0	0	0	0	0	0	0	0	0	0	0	0	0	12	0	0	0	0	0	0	0	k__Bacteria; p__Chlamydiae; c__Chlamydiae; o__Chlamydiales; f__cvE6; g__norank_f__cvE6; s__uncultured_bacterium_g__norank_f__cvE6
OTU535	0	0	0	0	0	0	0	0	0	0	0	0	3	0	0	0	0	0	2	0	0	0	11	0	0	0	0	0	0	0	k__Bacteria; p__Bacteroidetes; c__Bacteroidia; o__Sphingobacteriales; f__env.OPS_17; g__norank_f__env.OPS_17; s__unclassified_g__norank_f__env.OPS_17
OTU536	0	0	0	0	0	0	0	0	0	0	0	0	0	0	0	0	0	0	0	0	0	0	19	0	0	0	0	0	0	0	k__Bacteria; p__Proteobacteria; c__Alphaproteobacteria; o__Micavibrionales; f__norank_o__Micavibrionales; g__norank_o__Micavibrionales; s__uncultured_eubacterium_WD2107
OTU537	0	0	0	0	0	0	0	0	0	0	0	0	0	0	0	0	0	0	0	0	0	0	2	0	0	0	0	0	0	0	k__Bacteria; p__Proteobacteria; c__Deltaproteobacteria; o__Myxococcales; f__Polyangiaceae; g__Pajaroellobacter; s__unclassified_g__Pajaroellobacter
OTU538	0	0	0	0	0	0	0	0	0	0	0	0	0	0	0	0	0	1	0	0	0	0	9	0	0	0	0	0	1	0	k__Bacteria; p__Proteobacteria; c__Deltaproteobacteria; o__Myxococcales; f__Haliangiaceae; g__Haliangium; s__unclassified_g__Haliangium
OTU539	0	0	0	0	0	0	0	0	0	0	0	0	0	0	0	0	0	0	0	0	0	0	38	0	0	0	0	1	0	0	k__Bacteria; p__Proteobacteria; c__Alphaproteobacteria; o__Dongiales; f__Dongiaceae; g__Dongia; s__Dongia_rigui
OTU540	0	0	0	0	0	0	0	0	0	0	0	0	0	0	0	0	0	0	0	0	0	0	1	0	1	0	0	0	0	0	k__Bacteria; p__Actinobacteria; c__Actinobacteria; o__IMCC26256; f__norank_o__IMCC26256; g__norank_o__IMCC26256; s__uncultured_bacterium_g__norank_o__IMCC26256
OTU541	0	0	0	0	0	0	0	0	0	0	0	0	0	0	0	0	0	0	0	0	0	0	1	0	0	0	0	0	0	0	k__Bacteria; p__Proteobacteria; c__Alphaproteobacteria; o__Holosporales; f__Holosporaceae; g__norank_f__Holosporaceae; s__uncultured_proteobacterium_g__norank_f__Holosporaceae
OTU542	0	0	0	0	0	0	0	0	0	0	0	0	0	0	0	0	0	1	2	2	0	0	33	0	4	0	2	1	8	1	k__Bacteria; p__Proteobacteria; c__Alphaproteobacteria; o__Reyranellales; f__Reyranellaceae; g__Reyranella; s__unclassified_g__Reyranella
OTU543	0	0	0	0	0	0	0	0	0	0	0	0	0	0	0	0	0	1	0	0	0	0	150	0	0	0	4	8	3	0	k__Bacteria; p__Proteobacteria; c__Deltaproteobacteria; o__Myxococcales; f__Haliangiaceae; g__Haliangium; s__uncultured_delta_proteobacterium_g__Haliangium
OTU544	0	0	0	0	0	0	0	0	0	0	0	0	0	0	0	1	0	0	0	0	0	0	10	0	0	0	0	0	0	0	k__Bacteria; p__Proteobacteria; c__unclassified_p__Proteobacteria; o__unclassified_p__Proteobacteria; f__unclassified_p__Proteobacteria; g__unclassified_p__Proteobacteria; s__unclassified_p__Proteobacteria
OTU545	2	0	0	0	0	0	0	0	0	0	0	0	0	0	0	0	0	3	0	0	0	0	30	0	0	0	0	0	0	2	k__Bacteria; p__Proteobacteria; c__Gammaproteobacteria; o__Betaproteobacteriales; f__Burkholderiaceae; g__Ramlibacter; s__Ramlibacter_sp.
OTU546	0	0	0	0	0	0	0	0	0	0	0	0	0	0	0	0	0	0	1	0	0	0	21	0	0	0	0	0	0	0	k__Bacteria; p__Proteobacteria; c__Alphaproteobacteria; o__Caulobacterales; f__Caulobacteraceae; g__Asticcacaulis; s__uncultured_Asticcacaulis_sp.
OTU547	0	0	0	0	0	0	0	0	0	0	0	0	0	0	0	0	0	0	0	0	0	0	432	0	0	0	0	0	1	0	k__Bacteria; p__Spirochaetes; c__Spirochaetia; o__Spirochaetales; f__Spirochaetaceae; g__Spirochaeta_2; s__unclassified_g__Spirochaeta_2
OTU548	0	0	0	0	0	0	0	0	0	0	0	0	0	0	0	0	0	0	0	1	0	0	281	0	0	0	0	1	0	0	k__Bacteria; p__Proteobacteria; c__Alphaproteobacteria; o__Rhizobiales; f__Pleomorphomonadaceae; g__Pleomorphomonas; s__unclassified_g__Pleomorphomonas
OTU549	0	0	0	0	0	0	0	0	0	0	0	0	0	0	0	0	0	0	0	0	0	0	78	0	0	0	0	0	0	1	k__Bacteria; p__Proteobacteria; c__Alphaproteobacteria; o__Caulobacterales; f__Caulobacteraceae; g__Caulobacter; s__Caulobacter_sp._UNC358MFTsu5.1
OTU550	0	0	0	0	0	0	0	0	0	0	0	0	0	0	0	0	0	0	0	0	0	0	28	0	0	0	0	0	0	1	k__Bacteria; p__Proteobacteria; c__Alphaproteobacteria; o__Rhizobiales; f__Xanthobacteraceae; g__norank_f__Xanthobacteraceae; s__unclassified_g__norank_f__Xanthobacteraceae
OTU553	0	0	0	0	0	0	0	0	0	0	0	0	0	0	0	0	0	0	0	0	0	0	6	0	0	0	0	0	0	0	k__Bacteria; p__Proteobacteria; c__Gammaproteobacteria; o__Xanthomonadales; f__Rhodanobacteraceae; g__Tahibacter; s__uncultured_bacterium_g__Tahibacter
OTU554	0	0	0	0	0	0	0	0	0	0	0	0	0	0	0	0	0	0	0	0	0	0	7	0	0	0	0	0	0	0	k__Bacteria; p__Bacteroidetes; c__Bacteroidia; o__Chitinophagales; f__37-13; g__norank_f__37-13; s__unclassified_g__norank_f__37-13
OTU555	0	0	0	0	0	0	0	0	0	0	0	0	0	0	0	0	0	0	0	0	0	0	3	0	0	0	0	0	0	0	k__Bacteria; p__Proteobacteria; c__Gammaproteobacteria; o__Betaproteobacteriales; f__Nitrosomonadaceae; g__MND1; s__unclassified_g__MND1
OTU556	0	0	0	0	0	0	0	0	0	0	0	0	0	0	0	0	0	0	0	0	0	0	7	0	0	0	0	0	0	0	k__Bacteria; p__Proteobacteria; c__Alphaproteobacteria; o__Rhizobiales; f__Pleomorphomonadaceae; g__Ancalomicrobium; s__uncultured_bacterium_g__Ancalomicrobium
OTU557	2	0	5	0	0	0	0	0	7	0	0	0	0	0	0	0	0	0	1	2	0	0	0	0	1	0	0	0	0	0	k__Bacteria; p__Deinococcus-Thermus; c__Deinococci; o__Deinococcales; f__Trueperaceae; g__Truepera; s__uncultured_Deinococcales_bacterium
OTU558	0	0	0	0	0	0	0	0	0	0	0	0	0	0	0	0	0	0	0	0	0	0	0	1	0	0	0	0	0	0	k__Bacteria; p__unclassified_k__Bacteria; c__unclassified_k__norank_d__Bacteria; p__unclassified_k__Bacteria; p__unclassified_k__Bacteria; p__unclassified_k__Bacteria; p__unclassified_k__Bacteria
OTU559	0	0	0	0	0	0	0	0	0	0	0	0	0	0	0	0	0	0	0	0	0	0	0	1	0	0	0	0	0	0	k__Bacteria; p__Proteobacteria; c__Alphaproteobacteria; o__Sphingomonadales; f__Sphingomonadaceae; g__Sandaracinobacter; s__uncultured_bacterium_g__Sandaracinobacter
OTU560	0	0	0	0	0	0	0	0	0	0	0	0	0	0	0	2	0	0	0	0	0	0	0	0	0	0	0	0	0	0	k__Bacteria; p__Actinobacteria; c__Actinobacteria; o__Catenulisporales; f__Actinospicaceae; g__Actinospica; s__unclassified_g__Actinospica
OTU561	0	0	0	0	2	0	0	0	0	0	0	0	0	0	0	0	0	0	0	2	0	0	0	1	15	0	0	0	0	0	k__Bacteria; p__Bacteroidetes; c__Bacteroidia; o__Flavobacteriales; f__Weeksellaceae; g__Chryseobacterium; s__Chryseobacterium_taklimakanense
OTU562	0	0	3	0	0	0	0	0	0	0	0	0	0	0	0	0	0	0	0	0	0	0	0	2	0	0	0	0	0	0	k__Bacteria; p__Firmicutes; c__Clostridia; o__Clostridiales; f__Family_XI_o__Clostridiales; g__Finegoldia; s__uncultured_bacterium_g__Finegoldia
OTU563	0	0	0	0	0	0	0	0	0	0	0	0	0	0	0	0	0	0	0	0	0	0	0	3	0	0	0	0	0	0	k__Bacteria; p__unclassified_k__Bacteria; c__unclassified_k__norank_d__Bacteria; p__unclassified_k__Bacteria; p__unclassified_k__Bacteria; p__unclassified_k__Bacteria; p__unclassified_k__Bacteria
OTU564	0	0	0	0	0	0	0	0	0	0	0	0	0	0	0	0	0	0	3	0	0	0	0	58	0	0	0	0	0	0	k__Bacteria; p__Actinobacteria; c__Actinobacteria; o__Frankiales; f__unclassified_o__Frankiales; g__unclassified_o__Frankiales; s__unclassified_o__Frankiales
OTU565	0	0	0	0	0	0	0	0	0	0	0	0	0	0	0	0	0	0	0	0	0	0	0	5	0	0	0	0	0	0	k__Bacteria; p__unclassified_k__Bacteria; c__unclassified_k__norank_d__Bacteria; p__unclassified_k__Bacteria; p__unclassified_k__Bacteria; p__unclassified_k__Bacteria; p__unclassified_k__Bacteria
OTU566	0	0	0	0	0	0	0	0	0	0	0	0	0	0	0	0	0	0	0	0	0	0	0	18	0	0	0	0	0	0	k__Bacteria; p__Proteobacteria; c__Gammaproteobacteria; o__Betaproteobacteriales; f__Burkholderiaceae; g__Candidatus_Glomeribacter; s__Candidatus_Glomeribacter_gigasporarum
OTU567	0	0	0	0	0	0	0	0	0	0	0	0	0	0	0	0	0	1	0	2	0	0	0	5	0	301	0	0	0	0	k__Bacteria; p__Proteobacteria; c__Gammaproteobacteria; o__Betaproteobacteriales; f__Burkholderiaceae; g__Burkholderia-Caballeronia-Paraburkholderia; s__unclassified_g__Burkholderia-Caballeronia-Paraburkholderia
OTU568	0	0	0	0	0	1	0	0	0	0	0	0	0	0	0	0	0	0	0	15	0	0	0	264	0	0	84	0	0	0	k__Bacteria; p__unclassified_k__Bacteria; c__unclassified_k__norank_d__Bacteria; p__unclassified_k__Bacteria; p__unclassified_k__Bacteria; p__unclassified_k__Bacteria; p__unclassified_k__Bacteria
OTU569	0	0	6	0	0	0	0	0	0	0	0	0	0	0	0	0	0	0	0	0	0	0	0	3	0	0	0	0	0	0	k__Bacteria; p__Actinobacteria; c__Actinobacteria; o__Micrococcales; f__Demequinaceae; g__Demequina; s__uncultured_bacterium_g__Demequina
OTU570	0	0	0	0	0	2	0	0	0	0	0	0	0	0	0	0	0	0	0	0	0	0	0	5724	0	0	0	0	0	0	k__Bacteria; p__Proteobacteria; c__Gammaproteobacteria; o__Betaproteobacteriales; f__Burkholderiaceae; g__Candidatus_Glomeribacter; s__Candidatus_Glomeribacter_gigasporarum
OTU571	0	0	0	0	0	0	0	0	0	0	0	0	0	0	0	0	0	0	0	0	0	0	0	3	0	0	0	0	0	0	k__Bacteria; p__Proteobacteria; c__Gammaproteobacteria; o__Betaproteobacteriales; f__Burkholderiaceae; g__Candidatus_Glomeribacter; s__unclassified_g__Candidatus_Glomeribacter
OTU572	0	0	0	0	0	0	0	0	0	0	0	0	1	0	0	0	0	0	0	0	0	0	0	2	1	0	4	0	0	0	k__Bacteria; p__Deinococcus-Thermus; c__Deinococci; o__Deinococcales; f__Trueperaceae; g__Truepera; s__uncultured_endolithic_bacterium_g__Truepera
OTU573	0	0	0	0	0	0	0	0	0	0	0	0	0	0	0	0	0	0	0	0	0	0	0	0	8	0	0	0	0	0	k__Bacteria; p__Proteobacteria; c__Deltaproteobacteria; o__Myxococcales; f__BIrii41; g__norank_f__BIrii41; s__uncultured_delta_proteobacterium_g__norank_f__BIrii41
OTU574	0	10	19	1	0	0	0	0	4	0	0	0	0	0	0	0	0	0	2	3	1	0	0	0	7	0	0	0	2	0	k__Bacteria; p__Proteobacteria; c__Deltaproteobacteria; o__Bdellovibrionales; f__Bacteriovoracaceae; g__Peredibacter; s__unclassified_g__Peredibacter
OTU575	32	30	102	46	23	59	42	46	80	33	47	8	6	5	22	33	29	2	32	57	3	0	5	36	120	0	63	0	11	3	k__Bacteria; p__Proteobacteria; c__Alphaproteobacteria; o__Caulobacterales; f__Caulobacteraceae; g__Brevundimonas; s__unclassified_g__Brevundimonas
OTU576	0	0	0	0	0	0	0	0	0	0	0	0	0	0	0	0	0	0	0	0	0	0	1	0	2	0	0	0	0	0	k__Bacteria; p__Proteobacteria; c__Alphaproteobacteria; o__Reyranellales; f__Reyranellaceae; g__norank_f__Reyranellaceae; s__uncultured_Rhodospirillales_bacterium_g__norank
OTU577	0	0	0	0	0	0	0	0	0	0	0	0	0	0	0	0	0	0	0	0	0	0	0	0	1	0	0	0	0	0	k__Bacteria; p__Proteobacteria; c__Alphaproteobacteria; o__Acetobacterales; f__Acetobacteraceae; g__unclassified_f__Acetobacteraceae; s__unclassified_f__Acetobacteraceae
OTU578	0	0	0	0	0	0	0	0	0	0	0	0	0	0	0	0	0	0	0	0	0	0	0	0	1	0	0	0	0	0	k__Bacteria; p__Acidobacteria; c__Subgroup_5; o__norank_c__Subgroup_5; f__norank_c__Subgroup_5; g__norank_c__Subgroup_5; s__uncultured_Acidobacteria_bacterium_g__norank_c__Subgroup_5
OTU580	0	0	0	0	0	0	0	0	0	0	0	0	0	0	0	0	0	0	0	0	0	0	0	0	1	0	0	0	0	0	k__Bacteria; p__Firmicutes; c__Bacilli; o__Bacillales; f__Paenibacillaceae; g__unclassified_f__Paenibacillaceae; s__unclassified_f__Paenibacillaceae
OTU581	0	0	0	0	0	0	0	0	0	0	0	0	0	0	0	0	0	0	0	0	0	0	0	0	4	0	0	0	0	0	k__Bacteria; p__Proteobacteria; c__Alphaproteobacteria; o__Rhizobiales; f__Hyphomicrobiaceae; g__Pedomicrobium; s__unclassified_g__Pedomicrobium
OTU582	0	0	0	0	0	0	0	0	0	0	0	0	0	0	0	0	0	0	0	0	0	0	0	0	1	0	0	0	0	0	k__Bacteria; p__Proteobacteria; c__Gammaproteobacteria; o__Betaproteobacteriales; f__Nitrosomonadaceae; g__mle1-7; s__unclassified_g__mle1-7
OTU583	0	0	0	0	0	0	0	0	0	0	0	0	0	0	0	0	0	0	0	0	0	0	0	0	2	0	0	0	0	0	k__Bacteria; p__Firmicutes; c__Bacilli; o__Bacillales; f__Paenibacillaceae; g__Paenibacillus; s__Paenibacillus_taihuensis
OTU584	0	0	0	0	0	0	0	0	0	0	0	0	0	0	0	0	0	0	0	0	0	0	0	0	2	0	0	0	0	0	k__Bacteria; p__Firmicutes; c__Clostridia; o__Clostridiales; f__Clostridiaceae_1; g__Clostridium_sensu_stricto_8; s__unclassified_g__Clostridium_sensu_stricto_8
OTU585	2	0	0	0	0	0	0	0	0	0	0	0	0	0	0	0	0	0	0	0	0	0	0	0	4	0	0	0	0	0	k__Bacteria; p__Actinobacteria; c__Actinobacteria; o__Microtrichales; f__Ilumatobacteraceae; g__norank_f__Ilumatobacteraceae; s__unclassified_g__norank_f__Ilumatobacteraceae
OTU587	0	0	0	0	0	0	0	0	0	0	0	0	0	0	0	0	0	0	0	0	0	0	0	0	1	0	0	0	0	0	k__Bacteria; p__Dependentiae; c__Babeliae; o__Babeliales; f__Babeliaceae; g__norank_f__Babeliaceae; s__uncultured_bacterium_g__norank_f__Babeliaceae
OTU588	0	0	0	0	0	0	0	0	0	0	0	0	0	0	0	0	0	0	0	0	0	0	0	0	8	0	0	1	0	0	k__Bacteria; p__Proteobacteria; c__Gammaproteobacteria; o__CCD24; f__norank_o__CCD24; g__norank_o__CCD24; s__uncultured_gamma_proteobacterium_g__norank_o__CCD24
OTU589	0	0	0	0	0	0	0	0	0	0	0	0	0	0	0	0	0	0	6	0	0	0	0	0	114	0	0	0	0	2	k__Bacteria; p__Actinobacteria; c__Actinobacteria; o__Glycomycetales; f__Glycomycetaceae; g__Glycomyces; s__Glycomyces_harbinensis
OTU591	0	0	0	0	0	0	0	0	0	0	0	0	0	0	0	0	0	0	1	0	0	0	0	0	3	0	0	0	0	0	k__Bacteria; p__Firmicutes; c__Bacilli; o__Bacillales; f__Sporolactobacillaceae; g__Tuberibacillus; s__Tuberibacillus_calidus
OTU592	0	0	0	0	0	0	0	0	0	0	0	0	0	0	0	0	0	0	0	0	0	0	0	0	1	0	0	0	0	0	k__Bacteria; p__Chloroflexi; c__unclassified_p__Chloroflexi; o__unclassified_p__Chloroflexi; f__unclassified_p__Chloroflexi; g__unclassified_p__Chloroflexi; s__unclassified_p__Chloroflexi
OTU593	0	0	0	0	0	0	0	0	1	0	0	0	0	0	0	0	4	0	0	0	0	0	0	0	5	0	0	0	0	0	k__Bacteria; p__Bacteroidetes; c__Bacteroidia; o__Sphingobacteriales; f__Sphingobacteriaceae; g__Sphingobacterium; s__Sphingobacterium_multivorum
OTU594	0	0	0	0	0	0	0	0	0	0	0	0	0	0	0	0	0	0	0	0	0	0	0	0	1	0	0	0	0	0	k__Bacteria; p__Proteobacteria; c__Deltaproteobacteria; o__MBNT15; f__norank_o__MBNT15; g__norank_o__MBNT15; s__unclassified_g__norank_o__MBNT15
OTU595	0	0	0	0	0	0	0	0	0	0	0	0	0	0	0	0	0	0	0	0	0	0	0	0	1	0	0	0	0	0	k__Bacteria; p__Actinobacteria; c__Actinobacteria; o__Kineosporiales; f__Kineosporiaceae; g__Quadrisphaera; s__uncultured_bacterium_g__Quadrisphaera
OTU596	0	0	0	0	0	0	0	0	0	0	0	0	0	0	0	0	0	0	0	6	0	0	1	0	8	0	0	0	0	0	k__Bacteria; p__Bacteroidetes; c__Rhodothermia; o__Rhodothermales; f__Rhodothermaceae; g__norank_f__Rhodothermaceae; s__unclassified_g__norank_f__Rhodothermaceae
OTU597	0	0	0	0	0	0	0	0	0	0	0	0	0	0	0	0	0	1	0	1	0	0	0	0	10	0	0	0	0	5	k__Bacteria; p__Actinobacteria; c__Actinobacteria; o__Gaiellales; f__Gaiellaceae; g__Gaiella; s__uncultured_actinobacterium_g__Gaiella
OTU599	0	0	1	0	0	0	0	0	0	0	0	0	0	0	0	0	0	0	1	0	0	0	1	0	23	0	0	0	0	0	k__Bacteria; p__Actinobacteria; c__Actinobacteria; o__Solirubrobacterales; f__67-14; g__norank_f__67-14; s__uncultured_bacterium_g__norank_f__67-14
OTU601	0	0	0	0	0	0	0	0	0	0	0	0	0	0	0	0	0	0	0	0	0	0	0	0	19	0	5	0	1	2	k__Bacteria; p__Proteobacteria; c__Alphaproteobacteria; o__Rhizobiales; f__Hyphomicrobiaceae; g__Pedomicrobium; s__uncultured_alpha_proteobacterium_g__Pedomicrobium
OTU602	0	0	0	0	0	0	0	0	0	0	0	0	0	0	0	0	0	0	0	0	0	0	0	0	3	0	0	0	0	0	k__Bacteria; p__Firmicutes; c__Clostridia; o__Clostridiales; f__Family_XVIII; g__Caldinitratiruptor; s__Caldinitratiruptor_microaerophilus
OTU603	0	0	0	0	0	0	0	0	0	0	0	0	0	0	0	0	0	0	1	0	0	0	0	0	2	0	0	0	0	0	k__Bacteria; p__Firmicutes; c__Bacilli; o__Bacillales; f__Paenibacillaceae; g__Paenibacillus; s__Paenibacillus_sp._Nal8
OTU604	0	0	0	0	0	0	0	0	0	0	0	0	0	0	0	0	0	0	0	0	0	0	0	0	20	0	0	0	0	0	k__Bacteria; p__Dependentiae; c__Babeliae; o__Babeliales; f__Babeliaceae; g__norank_f__Babeliaceae; s__uncultured_bacterium_g__norank_f__Babeliaceae
OTU605	0	0	0	0	0	0	0	0	0	0	0	0	0	0	0	0	0	0	0	0	0	0	0	0	1	0	0	0	0	0	k__Bacteria; p__Actinobacteria; c__Actinobacteria; o__Micromonosporales; f__Micromonosporaceae; g__unclassified_f__Micromonosporaceae; s__unclassified_f__Micromonosporaceae
OTU606	0	0	0	0	0	0	0	0	0	0	0	0	0	0	0	0	0	0	0	0	0	0	0	0	3	0	0	0	0	0	k__Bacteria; p__Proteobacteria; c__Alphaproteobacteria; o__unclassified_c__Alphaproteobacteria; f__unclassified_c__Alphaproteobacteria; g__unclassified_c__Alphaproteobacteria; s__unclassified_c__Alphaproteobacteria
OTU607	0	0	0	0	0	0	0	0	0	0	0	0	0	0	0	0	0	0	0	0	0	0	0	0	1	0	0	0	0	0	k__Bacteria; p__Proteobacteria; c__Alphaproteobacteria; o__Sphingomonadales; f__Sphingomonadaceae; g__Altererythrobacter; s__metagenome_g__Altererythrobacter
OTU608	0	0	0	0	0	0	229	5	0	0	0	0	0	0	0	0	0	0	5	0	0	1	2	0	33	0	3	0	0	3	k__Bacteria; p__Proteobacteria; c__Gammaproteobacteria; o__Betaproteobacteriales; f__Burkholderiaceae; g__Massilia; s__unclassified_g__Massilia
OTU609	0	0	0	0	0	0	0	0	0	0	0	0	0	0	0	0	0	0	0	0	0	0	0	0	3	0	0	0	0	0	k__Bacteria; p__Bacteroidetes; c__Bacteroidia; o__Cytophagales; f__Microscillaceae; g__norank_f__Microscillaceae; s__uncultured_Bacteroidetes_bacterium_g__norank_f__Microscillaceae
OTU610	0	0	0	0	0	0	0	0	0	0	0	0	0	0	0	0	0	0	0	0	0	0	0	0	34	0	4	0	0	0	k__Bacteria; p__Actinobacteria; c__Actinobacteria; o__Micromonosporales; f__Micromonosporaceae; g__unclassified_f__Micromonosporaceae; s__unclassified_f__Micromonosporaceae
OTU611	0	0	0	0	0	0	0	0	0	0	0	0	0	0	0	0	0	0	0	0	0	0	0	0	2	0	0	0	0	0	k__Bacteria; p__Firmicutes; c__Clostridia; o__Clostridiales; f__Family_XVIII; g__Symbiobacterium; s__uncultured_bacterium_g__Symbiobacterium
OTU612	0	0	0	0	0	0	0	0	0	0	0	0	0	0	0	0	0	0	0	0	0	0	0	0	1	0	0	0	0	0	k__Bacteria; p__Dependentiae; c__Babeliae; o__Babeliales; f__unclassified_o__Babeliales; g__unclassified_o__Babeliales; s__unclassified_o__Babeliales
OTU613	0	0	0	0	0	0	0	0	0	0	0	0	0	0	0	0	0	0	0	0	0	0	0	0	4	0	0	0	0	0	k__Bacteria; p__Proteobacteria; c__Alphaproteobacteria; o__Rhizobiales; f__Xanthobacteraceae; g__norank_f__Xanthobacteraceae; s__unclassified_g__norank_f__Xanthobacteraceae
OTU614	3	0	0	0	0	0	0	7	2	0	0	0	0	1	0	0	0	0	0	2	0	1	1	0	5	0	1	0	0	1	k__Bacteria; p__Actinobacteria; c__Actinobacteria; o__Micrococcales; f__Microbacteriaceae; g__unclassified_f__Microbacteriaceae; s__unclassified_f__Microbacteriaceae
OTU615	0	0	0	0	0	0	0	0	0	0	0	0	0	0	0	0	0	0	0	0	0	0	0	0	3	0	0	0	0	0	k__Bacteria; p__Actinobacteria; c__Actinobacteria; o__Micrococcales; f__Intrasporangiaceae; g__Ornithinimicrobium; s__uncultured_organism_g__Ornithinimicrobium
OTU616	0	0	0	0	0	0	0	0	0	0	0	0	0	0	0	0	0	0	3	0	0	0	1	0	31	0	0	0	3	0	k__Bacteria; p__Actinobacteria; c__Actinobacteria; o__Solirubrobacterales; f__67-14; g__norank_f__67-14; s__metagenome_g__norank_f__67-14
OTU618	0	0	0	0	0	0	0	0	0	0	0	0	0	0	1	0	0	0	0	0	0	0	0	0	1	0	0	0	0	0	k__Bacteria; p__Proteobacteria; c__Gammaproteobacteria; o__Betaproteobacteriales; f__unclassified_o__Betaproteobacteriales; g__unclassified_o__Betaproteobacteriales; s__unclassified_o__Betaproteobacteriales
OTU619	0	0	0	0	0	0	0	0	0	0	0	0	0	0	0	0	0	0	0	0	0	0	2	0	1	0	0	0	0	0	k__Bacteria; p__Actinobacteria; c__Actinobacteria; o__IMCC26256; f__norank_o__IMCC26256; g__norank_o__IMCC26256; s__unclassified_g__norank_o__IMCC26256
OTU620	0	0	0	0	0	0	0	0	0	0	0	0	0	0	0	0	0	0	0	0	0	0	0	0	9	0	0	0	0	0	k__Bacteria; p__Actinobacteria; c__Actinobacteria; o__Frankiales; f__Cryptosporangiaceae; g__Fodinicola; s__uncultured_bacterium_g__Fodinicola
OTU621	0	0	0	0	0	0	0	0	0	0	0	0	0	0	0	1	0	0	0	0	0	0	3	0	3	0	0	0	0	0	k__Bacteria; p__Proteobacteria; c__Alphaproteobacteria; o__Rhizobiales; f__Rhizobiales_Incertae_Sedis; g__Nordella; s__uncultured_bacterium_g__Nordella
OTU622	0	0	0	0	0	0	0	0	0	0	0	0	0	0	0	0	0	0	0	0	0	0	0	0	5	0	0	0	0	0	k__Bacteria; p__Actinobacteria; c__Actinobacteria; o__Streptomycetales; f__Streptomycetaceae; g__Streptomyces; s__Streptomyces_aculeolatus
OTU623	0	0	0	0	0	0	0	0	0	0	0	0	0	0	0	0	0	0	0	0	0	0	0	0	3	0	0	0	0	0	k__Bacteria; p__Proteobacteria; c__Alphaproteobacteria; o__Sphingomonadales; f__Sphingomonadaceae; g__Sphingomonas; s__bacterium_B0089
OTU624	0	0	0	0	0	0	0	0	0	0	0	0	0	0	0	0	0	0	0	0	0	0	0	0	1	0	0	0	0	0	k__Bacteria; p__Actinobacteria; c__Actinobacteria; o__Micrococcales; f__Promicromonosporaceae; g__Cellulosimicrobium; s__Cellulosimicrobium_cellulans_g__Cellulosimicrobium
OTU626	6	2	0	0	0	0	0	0	0	0	1	0	0	1	0	0	0	0	0	2	0	0	0	3	104	0	0	0	0	4	k__Bacteria; p__Actinobacteria; c__Actinobacteria; o__Propionibacteriales; f__Nocardioidaceae; g__Kribbella; s__unclassified_g__Kribbella
OTU627	0	0	0	0	0	0	3	0	0	0	7	0	10	0	3	0	0	0	0	8	0	0	0	1	2	0	3	0	2	0	k__Bacteria; p__Actinobacteria; c__Actinobacteria; o__Micrococcales; f__Microbacteriaceae; g__Leucobacter; s__uncultured_bacterium_g__Leucobacter
OTU628	0	0	0	0	0	0	0	0	0	0	0	0	0	0	0	0	0	0	0	2	0	0	16	0	26	0	7	6	3	1	k__Bacteria; p__Proteobacteria; c__Alphaproteobacteria; o__Dongiales; f__Dongiaceae; g__Dongia; s__unclassified_g__Dongia
OTU629	0	0	0	0	0	0	0	0	0	0	0	0	0	0	0	0	0	0	0	0	0	0	0	0	2	0	0	0	0	0	k__Bacteria; p__Chlamydiae; c__Chlamydiae; o__Chlamydiales; f__Parachlamydiaceae; g__unclassified_f__Parachlamydiaceae; s__unclassified_f__Parachlamydiaceae
OTU630	0	48	0	0	0	0	6	0	0	4	0	0	0	0	0	8	0	4	0	0	0	0	7	0	685	0	0	1	0	0	k__Bacteria; p__Bacteroidetes; c__Bacteroidia; o__Flavobacteriales; f__Flavobacteriaceae; g__Flavobacterium; s__Flavobacterium_johnsoniae_UW101
OTU631	0	0	0	0	0	0	0	0	0	0	0	0	0	0	0	0	0	0	0	0	0	0	0	0	4	0	0	0	0	0	k__Bacteria; p__Proteobacteria; c__Gammaproteobacteria; o__Diplorickettsiales; f__Diplorickettsiaceae; g__unclassified_f__Diplorickettsiaceae; s__unclassified_f__Diplorickettsiaceae
OTU632	0	0	0	0	0	0	0	0	0	0	0	0	0	0	0	0	0	0	0	0	0	0	0	0	1	0	0	0	0	0	k__Bacteria; p__Planctomycetes; c__Phycisphaerae; o__Phycisphaerales; f__Phycisphaeraceae; g__SM1A02; s__unclassified_g__SM1A02
OTU633	0	0	0	0	0	0	0	0	0	0	0	0	0	0	0	0	0	0	0	0	0	0	0	0	1	0	0	0	0	0	k__Bacteria; p__Firmicutes; c__Bacilli; o__Bacillales; f__Paenibacillaceae; g__Aneurinibacillus; s__uncultured_bacterium_g__Aneurinibacillus
OTU634	0	0	0	0	0	0	0	0	0	0	0	0	0	0	0	0	0	0	0	0	0	0	0	0	6	0	0	0	0	0	k__Bacteria; p__Fibrobacteres; c__Fibrobacteria; o__Fibrobacterales; f__Fibrobacteraceae; g__possible_genus_04; s__uncultured_bacterium_g__possible_genus_04
OTU635	0	0	0	0	0	0	0	0	0	0	0	0	0	0	0	0	0	0	0	0	0	0	0	0	1	0	0	0	0	0	k__Bacteria; p__Bacteroidetes; c__Ignavibacteria; o__SJA-28; f__norank_o__SJA-28; g__norank_o__SJA-28; s__uncultured_bacterium_g__norank_o__SJA-28
OTU637	0	0	0	0	0	0	0	0	0	0	0	0	0	0	0	0	0	0	0	0	0	0	0	0	6	0	0	0	0	0	k__Bacteria; p__Gemmatimonadetes; c__Gemmatimonadetes; o__Gemmatimonadales; f__Gemmatimonadaceae; g__norank_f__Gemmatimonadaceae; s__bacterium_enrichment_culture_clone_R1492-14
OTU638	2	0	0	1	0	0	0	0	0	0	0	0	0	0	0	0	0	0	0	0	0	0	0	0	1	0	0	0	0	0	k__Bacteria; p__Proteobacteria; c__Alphaproteobacteria; o__Sphingomonadales; f__Sphingomonadaceae; g__Novosphingobium; s__uncultured_alpha_proteobacterium_g__Novosphingobium
OTU639	0	0	0	0	0	0	0	0	0	0	0	0	0	0	0	0	0	0	0	0	0	0	0	0	3	0	0	0	0	0	k__Bacteria; p__Proteobacteria; c__Alphaproteobacteria; o__Elsterales; f__norank_o__Elsterales; g__norank_o__Elsterales; s__uncultured_bacterium_DA111
OTU640	0	0	0	0	0	0	0	0	0	0	0	0	0	0	0	0	0	0	0	0	0	0	0	2	0	0	0	0	0	0	k__Bacteria; p__Actinobacteria; c__Actinobacteria; o__Microtrichales; f__norank_o__Microtrichales; g__norank_o__Microtrichales; s__unclassified_g__norank_o__Microtrichales
OTU641	0	0	0	0	0	0	0	0	0	0	0	0	0	0	0	0	0	0	0	0	0	0	0	0	2	0	0	0	0	0	k__Bacteria; p__Actinobacteria; c__Actinobacteria; o__Propionibacteriales; f__Nocardioidaceae; g__Nocardioides; s__unclassified_g__Nocardioides
OTU642	0	0	0	0	0	0	0	0	0	0	0	0	0	0	0	0	0	0	0	0	0	0	0	0	1	0	0	0	0	2	k__Bacteria; p__Proteobacteria; c__Alphaproteobacteria; o__Rhizobiales; f__Methyloligellaceae; g__norank_f__Methyloligellaceae; s__unclassified_g__norank_f__Methyloligellaceae
OTU643	0	0	0	0	0	0	0	0	0	0	0	0	0	0	0	0	0	0	0	0	0	0	0	0	8	0	0	0	0	0	k__Bacteria; p__unclassified_k__Bacteria; c__unclassified_k__norank_d__Bacteria; p__unclassified_k__Bacteria; p__unclassified_k__Bacteria; p__unclassified_k__Bacteria; p__unclassified_k__Bacteria
OTU644	0	0	0	0	0	0	0	0	0	0	0	0	0	0	0	0	0	0	0	0	0	0	0	0	6	0	0	0	0	0	k__Bacteria; p__Proteobacteria; c__Gammaproteobacteria; o__Betaproteobacteriales; f__Nitrosomonadaceae; g__MND1; s__uncultured_soil_bacterium_g__MND1
OTU645	0	0	0	0	0	0	0	0	0	0	0	0	0	0	0	0	0	0	0	0	0	0	0	0	1	0	0	0	0	0	k__Bacteria; p__Proteobacteria; c__Gammaproteobacteria; o__Betaproteobacteriales; f__Procabacteriaceae; g__Procabacter; s__unclassified_g__Procabacter
OTU646	0	0	0	0	0	0	0	0	0	0	0	0	0	0	0	0	0	0	0	0	0	0	0	0	12	0	0	0	0	0	k__Bacteria; p__Proteobacteria; c__Alphaproteobacteria; o__Rhizobiales; f__Amb-16S-1323; g__norank_f__Amb-16S-1323; s__uncultured_bacterium_g__norank_f__Amb-16S-1323
OTU648	0	0	0	0	0	0	0	0	0	0	0	0	0	0	0	0	0	0	0	0	0	0	0	0	4	0	0	0	0	0	k__Bacteria; p__Firmicutes; c__Clostridia; o__Clostridiales; f__Ruminococcaceae; g__Ruminiclostridium; s__Ruminiclostridium_thermocellum
OTU649	0	5	0	0	0	0	0	0	0	0	0	0	0	0	0	0	0	0	1	0	0	1	0	0	8	0	0	1	0	0	k__Bacteria; p__Proteobacteria; c__Alphaproteobacteria; o__Rhizobiales; f__Xanthobacteraceae; g__Xanthobacter; s__unclassified_g__Xanthobacter
OTU650	0	0	0	0	0	0	0	0	0	0	0	0	0	0	0	0	0	0	0	0	0	0	0	0	3	0	0	0	0	0	k__Bacteria; p__Actinobacteria; c__Actinobacteria; o__Streptosporangiales; f__Streptosporangiaceae; g__Sphaerisporangium; s__unclassified_g__Sphaerisporangium
OTU651	0	0	0	0	0	0	0	0	0	0	0	0	2	0	0	0	0	1	0	0	0	0	0	0	8	0	0	0	1	0	k__Bacteria; p__Actinobacteria; c__Actinobacteria; o__Gaiellales; f__Gaiellaceae; g__Gaiella; s__actinobacterium_WWH12
OTU652	0	0	0	0	0	0	0	0	0	0	0	0	0	0	0	0	0	0	0	0	0	0	0	0	4	0	0	0	0	0	k__Bacteria; p__Firmicutes; c__Bacilli; o__norank_c__Bacilli; f__norank_c__Bacilli; g__norank_c__Bacilli; s__unclassified_g__norank_c__Bacilli
OTU653	0	0	0	0	0	0	0	0	1	0	0	0	0	1	0	0	1	3	0	0	0	0	2	0	29	0	4	0	9	3	k__Bacteria; p__Proteobacteria; c__Alphaproteobacteria; o__Rhizobiales; f__Rhodomicrobiaceae; g__Rhodomicrobium; s__uncultured_alpha_proteobacterium_g__Rhodomicrobium
OTU654	1	0	0	0	0	0	0	0	0	0	0	0	0	0	0	0	0	0	1	0	0	0	0	0	23	0	0	0	0	1	k__Bacteria; p__Proteobacteria; c__Alphaproteobacteria; o__Sphingomonadales; f__Sphingomonadaceae; g__Altererythrobacter; s__uncultured_Sphingomonadaceae_bacterium_g__Altererythrobacter
OTU655	0	0	0	0	0	0	0	0	0	0	0	0	0	0	0	0	0	0	0	0	0	0	0	0	1	0	0	0	0	0	k__Bacteria; p__Firmicutes; c__Bacilli; o__Bacillales; f__Paenibacillaceae; g__Cohnella; s__unclassified_g__Cohnella
OTU656	0	0	0	0	0	0	0	0	0	0	0	0	0	0	0	1	0	0	1	1	0	0	0	0	2	0	2	0	2	0	k__Bacteria; p__Proteobacteria; c__Alphaproteobacteria; o__Sphingomonadales; f__Sphingomonadaceae; g__Sphingobium; s__Sphingobium_xenophagum
OTU657	0	0	2	1	2	6	3	0	2	0	0	1	7	0	1	2	4	1	0	1	1	1	10	0	178	0	5	0	0	0	k__Bacteria; p__Proteobacteria; c__Alphaproteobacteria; o__Sphingomonadales; f__Sphingomonadaceae; g__Novosphingobium; s__unclassified_g__Novosphingobium
OTU658	0	0	0	0	0	0	0	0	0	0	0	0	0	0	0	0	0	0	0	2	1	0	0	0	4	0	2	0	0	0	k__Bacteria; p__Proteobacteria; c__Alphaproteobacteria; o__Rhizobiales; f__Hyphomicrobiaceae; g__Hyphomicrobium; s__unclassified_g__Hyphomicrobium
OTU659	0	0	0	0	0	0	0	0	0	0	0	0	0	0	0	0	0	0	0	0	0	0	0	0	2	0	0	0	0	0	k__Bacteria; p__Proteobacteria; c__Gammaproteobacteria; o__unclassified_c__Gammaproteobacteria; f__unclassified_c__Gammaproteobacteria; g__unclassified_c__Gammaproteobacteria; s__unclassified_c__Gammaproteobacteria
OTU660	0	0	0	0	0	0	0	0	0	0	0	0	0	0	0	0	0	0	0	0	0	0	0	0	2	0	0	0	0	0	k__Bacteria; p__Proteobacteria; c__Gammaproteobacteria; o__unclassified_c__Gammaproteobacteria; f__unclassified_c__Gammaproteobacteria; g__unclassified_c__Gammaproteobacteria; s__unclassified_c__Gammaproteobacteria
OTU661	0	0	0	0	0	0	0	0	0	0	0	0	0	0	0	0	0	0	0	0	0	0	1	0	1	0	0	0	0	0	k__Bacteria; p__Actinobacteria; c__Actinobacteria; o__norank_c__Actinobacteria; f__norank_c__Actinobacteria; g__norank_c__Actinobacteria; s__uncultured_Acidimicrobidae_bacterium_g__norank_c__Actinobacteria
OTU662	0	0	0	0	0	0	0	0	0	0	0	0	0	0	0	0	0	0	0	0	0	0	1	0	10	0	0	0	0	1	k__Bacteria; p__Nitrospirae; c__Nitrospira; o__norank_c__Nitrospira; f__norank_c__Nitrospira; g__Nitrospira; s__unclassified_g__Nitrospira
OTU663	0	0	0	0	0	0	0	0	0	0	0	0	0	0	0	0	0	0	0	0	0	0	0	0	2	0	0	0	0	0	k__Bacteria; p__Proteobacteria; c__Alphaproteobacteria; o__Rhizobiales; f__Amb-16S-1323; g__norank_f__Amb-16S-1323; s__uncultured_bacterium_g__norank_f__Amb-16S-1323
OTU664	0	1	0	0	0	0	0	0	0	0	0	0	0	0	0	0	0	0	0	0	0	0	0	1	1	0	0	0	0	0	k__Bacteria; p__Proteobacteria; c__Alphaproteobacteria; o__Sphingomonadales; f__Sphingomonadaceae; g__norank_f__Sphingomonadaceae; s__unclassified_g__norank_f__Sphingomonadaceae
OTU665	0	0	0	0	0	0	0	0	0	0	0	0	0	0	0	0	0	0	0	0	0	0	0	0	4	0	0	0	0	0	k__Bacteria; p__Gemmatimonadetes; c__Gemmatimonadetes; o__Gemmatimonadales; f__Gemmatimonadaceae; g__unclassified_f__Gemmatimonadaceae; s__unclassified_f__Gemmatimonadaceae
OTU666	0	0	0	0	0	0	0	0	0	0	0	0	0	0	0	0	0	0	0	0	0	0	0	0	1	0	0	0	0	0	k__Bacteria; p__Proteobacteria; c__Alphaproteobacteria; o__norank_c__Alphaproteobacteria; f__norank_c__Alphaproteobacteria; g__norank_c__Alphaproteobacteria; s__uncultured_Rhodospirillales_bacterium_g__norank_c__Alphaproteobacteria
OTU667	0	0	0	0	0	0	0	0	0	0	0	0	0	0	0	0	0	0	0	0	0	0	0	0	2	0	0	0	0	0	k__Bacteria; p__Proteobacteria; c__Deltaproteobacteria; o__Oligoflexales; f__0319-6G20; g__norank_f__0319-6G20; s__uncultured_bacterium_g__norank_f__0319-6G20
OTU668	0	0	0	0	0	0	0	0	0	0	0	0	0	0	0	0	0	0	0	0	0	0	0	0	3	0	0	0	0	1	k__Bacteria; p__Proteobacteria; c__Gammaproteobacteria; o__Betaproteobacteriales; f__SC-I-84; g__norank_f__SC-I-84; s__unclassified_g__norank_f__SC-I-84
OTU669	0	0	0	0	0	0	0	0	0	0	0	0	0	0	0	0	0	6	0	0	0	1	0	0	11	0	0	0	0	4	k__Bacteria; p__Proteobacteria; c__Alphaproteobacteria; o__Rhizobiales; f__Xanthobacteraceae; g__unclassified_f__Xanthobacteraceae; s__unclassified_f__Xanthobacteraceae
OTU670	0	0	0	0	0	0	0	0	0	0	0	0	0	0	0	0	0	0	0	0	0	0	0	0	2	0	0	0	0	0	k__Bacteria; p__Proteobacteria; c__Alphaproteobacteria; o__norank_c__Alphaproteobacteria; f__norank_c__Alphaproteobacteria; g__norank_c__Alphaproteobacteria; s__uncultured_Rhodobacteraceae_bacterium_g__norank_c__Alphaproteobacteria
OTU671	0	0	0	0	0	0	0	0	0	0	0	0	0	0	0	0	0	0	0	0	0	0	1	0	1	0	0	0	0	0	k__Bacteria; p__Proteobacteria; c__Deltaproteobacteria; o__Myxococcales; f__bacteriap25; g__norank_f__bacteriap25; s__uncultured_Syntrophobacterales_bacterium_g__norank_f__bacteriap25
OTU672	0	0	0	0	0	0	0	0	0	0	0	0	0	0	0	0	0	0	0	0	0	0	0	0	1	0	0	0	0	0	k__Bacteria; p__Cyanobacteria; c__Sericytochromatia; o__norank_c__Sericytochromatia; f__norank_c__Sericytochromatia; g__norank_c__Sericytochromatia; s__unclassified_g__norank_c__Sericytochromatia
OTU673	1	1	0	1	0	1	0	0	2	0	0	0	0	0	0	0	0	0	64	4	0	0	0	1	30	0	0	0	2	15	k__Bacteria; p__Actinobacteria; c__Actinobacteria; o__Pseudonocardiales; f__Pseudonocardiaceae; g__Kibdelosporangium; s__unclassified_g__Kibdelosporangium
OTU674	0	0	0	0	0	0	0	0	0	0	0	0	0	0	0	0	0	0	0	0	0	0	0	0	3	0	0	0	0	0	k__Bacteria; p__Actinobacteria; c__Actinobacteria; o__Propionibacteriales; f__Nocardioidaceae; g__Nocardioides; s__unclassified_g__Nocardioides
OTU675	0	0	0	0	0	0	0	0	0	0	0	0	0	0	0	0	0	1	0	0	0	0	0	0	1	0	0	0	0	0	k__Bacteria; p__Actinobacteria; c__Actinobacteria; o__Gaiellales; f__Gaiellaceae; g__Gaiella; s__unclassified_g__Gaiella
OTU676	0	0	0	0	0	0	0	0	0	0	0	0	0	0	0	0	0	0	0	0	0	0	0	0	1	0	0	0	0	0	k__Bacteria; p__Planctomycetes; c__Phycisphaerae; o__Phycisphaerales; f__Phycisphaeraceae; g__SM1A02; s__unclassified_g__SM1A02
OTU678	0	0	0	0	0	0	0	0	0	0	0	0	0	0	0	0	0	0	0	0	0	0	0	0	19	0	0	0	0	0	k__Bacteria; p__Proteobacteria; c__Gammaproteobacteria; o__Betaproteobacteriales; f__TRA3-20; g__norank_f__TRA3-20; s__uncultured_beta_proteobacterium_g__norank_f__TRA3-20
OTU679	0	0	0	0	0	0	0	0	0	0	0	0	0	0	0	0	0	0	0	0	0	0	0	0	50	0	0	0	0	0	k__Bacteria; p__Firmicutes; c__Clostridia; o__Clostridiales; f__Ruminococcaceae; g__Ruminiclostridium_1; s__Clostridium]_hungatei
OTU680	0	0	0	0	0	0	0	0	0	0	0	0	0	0	0	0	0	0	0	0	0	0	0	0	9	0	0	0	0	0	k__Bacteria; p__Proteobacteria; c__Gammaproteobacteria; o__Betaproteobacteriales; f__Nitrosomonadaceae; g__IS-44; s__metagenome_g__IS-44
OTU681	0	0	0	0	0	0	0	0	0	0	0	0	0	0	0	0	0	15	0	1	0	0	0	0	5	0	8	0	0	1	k__Bacteria; p__Actinobacteria; c__Actinobacteria; o__Pseudonocardiales; f__Pseudonocardiaceae; g__Lechevalieria; s__Lechevalieria_aerocolonigenes
OTU682	0	0	0	0	0	0	0	0	0	0	0	0	0	0	0	0	0	0	0	0	0	0	0	0	11	0	0	0	0	5	k__Bacteria; p__Actinobacteria; c__Actinobacteria; o__norank_c__Actinobacteria; f__norank_c__Actinobacteria; g__norank_c__Actinobacteria; s__uncultured_Methylocystaceae_bacterium_g__norank
OTU683	0	0	0	0	0	0	0	0	0	0	0	0	0	0	0	0	0	0	0	0	0	0	0	0	11	0	0	0	0	0	k__Bacteria; p__Proteobacteria; c__Gammaproteobacteria; o__PLTA13; f__norank_o__PLTA13; g__norank_o__PLTA13; s__uncultured_gamma_proteobacterium_g__norank_o__PLTA13
OTU684	0	0	0	0	0	0	0	0	0	0	0	0	0	0	0	0	0	0	0	0	0	0	0	0	7	0	0	0	0	0	k__Bacteria; p__Actinobacteria; c__Actinobacteria; o__Corynebacteriales; f__Nocardiaceae; g__Nocardia; s__unclassified_g__Nocardia
OTU685	0	0	0	0	0	0	0	0	0	0	0	0	0	0	0	0	0	0	0	0	0	0	0	0	3	0	0	0	0	0	k__Bacteria; p__Firmicutes; c__Bacilli; o__Bacillales; f__Paenibacillaceae; g__Thermobacillus; s__Firmicutes_bacterium_JGI_0000119-C08
OTU686	0	0	0	0	1	0	0	0	0	0	0	0	0	0	0	0	0	0	0	0	0	0	0	2	1	0	0	0	0	0	k__Bacteria; p__Bacteroidetes; c__Bacteroidia; o__Cytophagales; f__Spirosomaceae; g__Persicitalea; s__unclassified_g__Persicitalea
OTU687	0	10	0	0	0	0	0	0	0	0	0	0	0	0	0	0	0	2	12	3	0	0	6	0	830	0	239	0	55	11	k__Bacteria; p__Actinobacteria; c__Actinobacteria; o__Streptomycetales; f__Streptomycetaceae; g__Streptomyces; s__unclassified_g__Streptomyces
OTU688	0	0	0	0	0	0	0	0	0	0	0	0	0	0	0	0	0	0	0	0	0	0	0	0	4	0	0	0	0	0	k__Bacteria; p__Bacteroidetes; c__Bacteroidia; o__Flavobacteriales; f__Flavobacteriaceae; g__Flavobacterium; s__uncultured_Myroides_sp._g__Flavobacterium
OTU689	0	0	0	0	0	0	0	0	0	0	0	0	0	0	0	0	0	0	0	0	0	0	0	0	1	0	0	0	0	0	k__Bacteria; p__Acidobacteria; c__Acidobacteriia; o__Solibacterales; f__Solibacteraceae_Subgroup_3; g__Bryobacter; s__unclassified_g__Bryobacter
OTU690	0	0	0	0	0	0	0	0	0	0	0	0	0	0	0	0	0	0	5	0	0	1	0	0	13	0	0	0	0	1	k__Bacteria; p__Proteobacteria; c__Alphaproteobacteria; o__Rhizobiales; f__Rhizobiaceae; g__unclassified_f__Rhizobiaceae; s__unclassified_f__Rhizobiaceae
OTU691	0	0	0	0	0	0	0	0	0	0	0	0	0	0	0	0	0	0	0	0	0	0	0	0	7	0	0	0	0	0	k__Bacteria; p__Proteobacteria; c__Gammaproteobacteria; o__Betaproteobacteriales; f__TRA3-20; g__norank_f__TRA3-20; s__unclassified_g__norank_f__TRA3-20
OTU692	0	0	0	0	0	0	0	0	0	0	0	0	0	0	0	0	0	1	0	0	0	0	0	0	3	0	0	0	0	0	k__Bacteria; p__Firmicutes; c__Bacilli; o__Bacillales; f__Bacillaceae; g__Geobacillus; s__Geobacillus_thermodenitrificans_subsp._thermodenitrificans
OTU693	0	0	0	0	0	0	0	0	0	0	0	0	0	1	0	0	0	0	2	0	0	0	1	0	1	0	0	0	0	0	k__Bacteria; p__Actinobacteria; c__Actinobacteria; o__Propionibacteriales; f__Nocardioidaceae; g__Nocardioides; s__metagenome_g__Nocardioides
OTU694	0	8	0	0	0	0	0	0	0	0	0	0	0	0	0	0	0	1	1	0	0	0	0	0	63	0	0	0	0	0	k__Bacteria; p__Proteobacteria; c__Alphaproteobacteria; o__Sphingomonadales; f__Sphingomonadaceae; g__Novosphingobium; s__Novosphingobium_resinovorum
OTU695	0	0	0	0	0	0	0	0	0	0	0	0	0	0	0	0	0	0	0	0	0	0	3	0	4	0	0	0	0	0	k__Bacteria; p__Actinobacteria; c__Actinobacteria; o__Micrococcales; f__Demequinaceae; g__Demequina; s__uncultured_bacterium_g__Demequina
OTU696	0	9	16	0	4	9	14	13	0	18	2	8	45	4	5	22	11	7	0	23	24	1	11	2	5	7827	4	21	19	1	k__Bacteria; p__Proteobacteria; c__Gammaproteobacteria; o__Betaproteobacteriales; f__Burkholderiaceae; g__Ralstonia; s__Ralstonia_solanacearum_g__Ralstonia
OTU697	0	0	0	0	0	0	0	0	0	0	0	0	0	0	0	0	0	0	0	0	0	0	0	0	0	0	6	0	0	0	k__Bacteria; p__Dependentiae; c__Babeliae; o__Babeliales; f__unclassified_o__Babeliales; g__unclassified_o__Babeliales; s__unclassified_o__Babeliales
OTU698	0	0	0	0	0	0	0	0	0	0	0	0	0	0	0	0	0	0	0	0	0	0	0	0	0	0	1	0	0	0	k__Bacteria; p__Proteobacteria; c__Alphaproteobacteria; o__norank_c__Alphaproteobacteria; f__norank_c__Alphaproteobacteria; g__norank_c__Alphaproteobacteria; s__uncultured_bacterium_g__norank_c__Alphaproteobacteria
OTU699	0	0	0	0	0	0	0	0	0	0	0	0	0	0	0	0	0	0	0	0	0	0	3	0	0	0	2	0	0	0	k__Bacteria; p__Proteobacteria; c__Alphaproteobacteria; o__Rhodospirillales; f__Rhodospirillaceae; g__norank_f__Rhodospirillaceae; s__uncultured_bacterium_g__norank_f__Rhodospirillaceae
OTU700	0	0	0	0	0	0	3	0	0	0	0	0	0	0	0	0	0	0	0	0	0	0	0	0	0	0	2	0	0	0	k__Bacteria; p__Gemmatimonadetes; c__Gemmatimonadetes; o__Longimicrobiales; f__Longimicrobiaceae; g__norank_f__Longimicrobiaceae; s__bacterium_YC-ZSS-LKJ147
OTU701	0	0	0	0	0	0	0	0	0	0	0	0	0	0	0	0	0	0	0	0	0	0	0	0	0	0	4	0	0	0	k__Bacteria; p__Actinobacteria; c__Actinobacteria; o__Streptosporangiales; f__Streptosporangiaceae; g__Acrocarpospora; s__unclassified_g__Acrocarpospora
OTU702	0	0	0	0	0	0	0	0	0	0	0	0	0	0	0	0	0	1	0	0	0	0	0	0	0	0	0	0	0	0	k__Bacteria; p__Proteobacteria; c__Deltaproteobacteria; o__Desulfuromonadales; f__Geobacteraceae; g__Geobacter; s__unclassified_g__Geobacter
OTU703	0	0	0	0	0	0	0	0	0	0	0	0	0	0	0	0	0	0	0	0	0	0	0	0	0	0	85	0	0	0	k__Bacteria; p__Firmicutes; c__Bacilli; o__Bacillales; f__Paenibacillaceae; g__Paenibacillus; s__Paenibacillus_sp._YN15
OTU704	0	0	0	0	0	0	0	0	0	0	0	0	0	0	0	0	0	0	0	0	0	0	0	0	0	0	25	0	0	0	k__Bacteria; p__unclassified_k__Bacteria; c__unclassified_k__norank_d__Bacteria; p__unclassified_k__Bacteria; p__unclassified_k__Bacteria; p__unclassified_k__Bacteria; p__unclassified_k__Bacteria
OTU705	0	1	0	0	0	2	0	0	2	0	0	0	4	0	0	0	0	0	0	0	0	0	0	0	0	0	1	0	2	0	k__Bacteria; p__Proteobacteria; c__Alphaproteobacteria; o__Sphingomonadales; f__Sphingomonadaceae; g__norank_f__Sphingomonadaceae; s__unclassified_g__norank_f__Sphingomonadaceae
OTU706	0	0	0	0	0	0	0	0	0	0	0	0	0	0	0	0	0	0	0	0	0	0	0	0	0	0	3	0	0	0	k__Bacteria; p__Proteobacteria; c__Alphaproteobacteria; o__Rickettsiales; f__SM2D12; g__norank_f__SM2D12; s__metagenome_g__norank_f__SM2D12
OTU708	1	0	3	0	0	0	0	0	0	0	0	0	1	0	1	0	10	0	2	0	0	0	0	3	3	0	4	0	0	4	k__Bacteria; p__Firmicutes; c__Bacilli; o__Bacillales; f__Bacillaceae; g__Bacillus; s__Bacillus_idriensis
OTU709	0	0	0	0	0	0	0	0	0	0	0	0	0	0	0	0	0	0	0	0	0	0	0	0	0	0	4	0	0	0	k__Bacteria; p__Firmicutes; c__Bacilli; o__Bacillales; f__Paenibacillaceae; g__Paenibacillus; s__Paenibacillus_sp._YN15
OTU710	0	0	0	0	0	0	0	0	0	0	0	0	0	0	0	0	0	0	0	0	0	0	0	0	0	0	1	0	0	0	k__Bacteria; p__Firmicutes; c__Clostridia; o__Clostridiales; f__Ruminococcaceae; g__unclassified_f__Ruminococcaceae; s__unclassified_f__Ruminococcaceae
OTU711	0	0	0	0	0	0	0	0	0	0	0	0	0	0	0	0	0	0	0	0	0	0	0	0	0	0	5	0	0	0	k__Bacteria; p__Proteobacteria; c__Deltaproteobacteria; o__Bdellovibrionales; f__Bdellovibrionaceae; g__Bdellovibrio; s__unclassified_g__Bdellovibrio
OTU712	0	0	0	0	0	0	0	0	0	0	0	0	0	0	0	0	0	2	1	2	0	1	0	0	7	0	2	4	1	1	k__Bacteria; p__Proteobacteria; c__Alphaproteobacteria; o__Rhizobiales; f__Xanthobacteraceae; g__Rhodoplanes; s__uncultured_alpha_proteobacterium_g__Rhodoplanes
OTU713	0	0	0	0	0	0	0	0	0	0	0	0	0	0	0	0	0	0	0	0	0	0	0	0	0	0	2	0	0	0	k__Bacteria; p__Firmicutes; c__Bacilli; o__Bacillales; f__Alicyclobacillaceae; g__Tumebacillus; s__unclassified_g__Tumebacillus
OTU714	0	0	0	0	0	0	0	0	0	0	0	0	0	0	0	0	0	0	0	0	0	0	0	2	1	0	0	0	0	3	k__Bacteria; p__Actinobacteria; c__Actinobacteria; o__Micrococcales; f__Microbacteriaceae; g__unclassified_f__Microbacteriaceae; s__unclassified_f__Microbacteriaceae
OTU715	0	0	0	0	0	0	0	0	0	0	0	0	0	0	0	0	0	0	0	0	0	0	0	0	0	0	104	0	0	0	k__Bacteria; p__Actinobacteria; c__Actinobacteria; o__unclassified_c__Actinobacteria; f__unclassified_c__Actinobacteria; g__unclassified_c__Actinobacteria; s__unclassified_c__Actinobacteria
OTU716	0	0	0	0	0	0	0	0	0	0	0	0	0	0	0	0	0	0	0	0	0	0	0	0	0	0	4	0	0	0	k__Bacteria; p__Actinobacteria; c__Actinobacteria; o__Rubrobacterales; f__Rubrobacteriaceae; g__Rubrobacter; s__uncultured_actinobacterium_g__Rubrobacter
OTU717	0	0	0	0	0	0	0	0	0	0	0	0	0	0	0	0	0	0	0	0	0	0	0	0	0	0	3	0	0	0	k__Bacteria; p__Bacteroidetes; c__Bacteroidia; o__Bacteroidales; f__Paludibacteraceae; g__F0058; s__uncultured_bacterium_g__F0058
OTU718	0	0	0	0	0	0	0	0	0	0	0	0	0	0	0	0	0	0	0	0	0	0	0	0	0	0	2	0	0	0	k__Bacteria; p__Firmicutes; c__Clostridia; o__Clostridiales; f__Lachnospiraceae; g__Catonella; s__uncultured_bacterium_g__Catonella
OTU719	0	0	0	0	0	0	0	0	0	0	0	0	0	0	0	0	0	0	0	0	0	0	0	0	0	0	58	0	0	0	k__Bacteria; p__Proteobacteria; c__Gammaproteobacteria; o__unclassified_c__Gammaproteobacteria; f__unclassified_c__Gammaproteobacteria; g__unclassified_c__Gammaproteobacteria; s__unclassified_c__Gammaproteobacteria
OTU720	0	0	0	0	0	0	0	0	0	0	0	0	0	0	0	0	0	0	0	0	0	0	0	0	0	0	5	0	0	0	k__Bacteria; p__Firmicutes; c__Clostridia; o__Clostridiales; f__Lachnospiraceae; g__unclassified_f__Lachnospiraceae; s__unclassified_f__Lachnospiraceae
OTU721	0	0	0	0	0	0	0	0	0	0	0	0	0	0	0	0	0	0	0	0	0	0	1	0	0	0	18	0	0	0	k__Bacteria; p__Bacteroidetes; c__Bacteroidia; o__Cytophagales; f__Microscillaceae; g__Ohtaekwangia; s__unclassified_g__Ohtaekwangia
OTU722	0	0	0	0	0	0	0	0	0	0	0	0	0	0	0	0	0	0	0	0	0	0	0	0	0	0	1	0	0	0	k__Bacteria; p__Proteobacteria; c__Deltaproteobacteria; o__Bdellovibrionales; f__Bdellovibrionaceae; g__Bdellovibrio; s__uncultured_Bdellovibrionales_bacterium_g__Bdellovibrio
OTU723	0	0	0	0	0	0	0	0	0	0	0	0	0	0	0	0	0	0	0	0	0	0	0	0	0	0	26	0	0	0	k__Bacteria; p__Firmicutes; c__Clostridia; o__Clostridiales; f__Gracilibacteraceae; g__Lutispora; s__uncultured_bacterium_g__Lutispora
OTU724	0	0	0	0	0	0	0	0	0	0	0	0	0	0	0	0	0	6	0	0	0	0	0	0	0	0	3	0	0	0	k__Bacteria; p__Proteobacteria; c__Gammaproteobacteria; o__Betaproteobacteriales; f__Nitrosomonadaceae; g__Ellin6067; s__unclassified_g__Ellin6067
OTU725	0	0	0	0	0	0	0	0	0	0	0	0	0	0	0	0	0	0	0	0	0	0	0	0	0	0	0	2	0	0	k__Bacteria; p__Bacteroidetes; c__Bacteroidia; o__Chitinophagales; f__Chitinophagaceae; g__unclassified_f__Chitinophagaceae; s__unclassified_f__Chitinophagaceae
OTU727	0	0	0	0	0	0	0	0	0	0	0	0	0	0	0	0	0	0	0	0	0	0	0	0	0	0	0	5	0	0	k__Bacteria; p__Firmicutes; c__Clostridia; o__Clostridiales; f__Clostridiaceae_1; g__Clostridium_sensu_stricto_12; s__unclassified_g__Clostridium_sensu_stricto_12
OTU729	0	0	0	0	0	0	0	0	0	0	0	0	0	0	0	0	0	0	0	0	0	0	0	0	0	0	0	3	0	0	k__Bacteria; p__Proteobacteria; c__Alphaproteobacteria; o__unclassified_c__Alphaproteobacteria; f__unclassified_c__Alphaproteobacteria; g__unclassified_c__Alphaproteobacteria; s__unclassified_c__Alphaproteobacteria
OTU730	0	0	0	0	0	0	0	0	0	0	0	0	0	0	0	0	0	0	0	0	0	0	0	0	0	0	0	2	2	0	k__Bacteria; p__Proteobacteria; c__Alphaproteobacteria; o__Rhizobiales; f__unclassified_o__Rhizobiales; g__unclassified_o__Rhizobiales; s__unclassified_o__Rhizobiales
OTU732	0	0	0	0	0	0	0	0	0	0	0	0	0	0	0	0	0	0	0	0	0	0	0	0	0	0	0	31	0	0	k__Bacteria; p__Proteobacteria; c__unclassified_p__Proteobacteria; o__unclassified_p__Proteobacteria; f__unclassified_p__Proteobacteria; g__unclassified_p__Proteobacteria; s__unclassified_p__Proteobacteria
OTU733	0	0	0	0	0	0	0	0	0	0	0	0	0	0	0	0	0	0	3	0	0	0	12	0	5	0	0	1	3	0	k__Bacteria; p__Proteobacteria; c__Alphaproteobacteria; o__Rhizobiales; f__Xanthobacteraceae; g__Pseudolabrys; s__metagenome_g__Pseudolabrys
OTU734	0	0	0	0	0	0	0	3	0	0	0	0	0	0	0	0	0	0	0	0	0	0	0	0	1	0	0	1	1	0	k__Bacteria; p__Proteobacteria; c__Alphaproteobacteria; o__Rhizobiales; f__Rhizobiaceae; g__Allorhizobium-Neorhizobium-Pararhizobium-Rhizobium; s__Neorhizobium_huautlense_g__Allorhizobium-Neorhizobium-Pararhizobium-Rhizobium
OTU735	0	0	0	0	0	0	0	0	0	0	0	0	0	0	0	0	0	0	0	0	0	0	0	0	1	0	4	3	0	0	k__Bacteria; p__Proteobacteria; c__Alphaproteobacteria; o__Rhizobiales; f__Rhodomicrobiaceae; g__Rhodomicrobium; s__unclassified_g__Rhodomicrobium
OTU736	0	0	0	0	0	0	0	0	0	0	0	0	0	0	0	0	0	0	0	0	0	0	0	0	0	0	0	12	0	0	k__Bacteria; p__unclassified_k__Bacteria; c__unclassified_k__norank_d__Bacteria; p__unclassified_k__Bacteria; p__unclassified_k__Bacteria; p__unclassified_k__Bacteria; p__unclassified_k__Bacteria
OTU737	0	0	0	0	0	0	0	0	0	0	0	0	0	0	0	0	0	0	0	0	0	0	0	0	0	0	0	4	0	0	k__Bacteria; p__Proteobacteria; c__Gammaproteobacteria; o__Pseudomonadales; f__Pseudomonadaceae; g__Pseudomonas; s__unclassified_g__Pseudomonas
OTU738	0	0	0	0	0	0	0	0	0	0	0	0	0	0	0	0	0	0	0	0	0	0	0	0	0	0	0	2	0	0	k__Bacteria; p__Proteobacteria; c__Gammaproteobacteria; o__Diplorickettsiales; f__Diplorickettsiaceae; g__norank_f__Diplorickettsiaceae; s__Rickettsiella_sp._5-186-2
OTU739	0	0	0	0	0	0	0	0	1	0	0	0	0	0	0	0	0	0	0	0	0	0	2	0	1	0	0	4	0	1	k__Bacteria; p__Proteobacteria; c__Deltaproteobacteria; o__Myxococcales; f__Polyangiaceae; g__Pajaroellobacter; s__unclassified_g__Pajaroellobacter
OTU740	0	0	0	0	0	0	0	0	0	0	0	0	0	0	0	0	0	0	1	0	0	0	5	0	0	0	3	3	0	0	k__Bacteria; p__Proteobacteria; c__Alphaproteobacteria; o__Micropepsales; f__Micropepsaceae; g__norank_f__Micropepsaceae; s__uncultured_bacterium_g__norank_f__Micropepsaceae
OTU741	0	0	0	0	0	0	0	0	0	0	0	0	0	0	0	0	0	0	0	0	0	0	2	0	0	0	0	2	2	0	k__Bacteria; p__Chloroflexi; c__Ktedonobacteria; o__C0119; f__norank_o__C0119; g__norank_o__C0119; s__uncultured_Chloroflexi_bacterium_g__norank_o__C0119
OTU742	0	1	0	0	0	0	7	0	0	0	0	0	0	0	0	0	0	0	0	0	0	0	0	0	1	0	0	5	0	0	k__Bacteria; p__Proteobacteria; c__Alphaproteobacteria; o__Rhizobiales; f__Rhizobiaceae; g__Allorhizobium-Neorhizobium-Pararhizobium-Rhizobium; s__unclassified_g__Allorhizobium-Neorhizobium-Pararhizobium-Rhizobium
OTU744	0	0	0	0	0	0	0	0	0	0	0	0	0	0	0	0	0	0	0	0	0	0	0	0	0	0	0	2	0	0	k__Bacteria; p__Chloroflexi; c__Ktedonobacteria; o__Ktedonobacterales; f__Ktedonobacteraceae; g__unclassified_f__Ktedonobacteraceae; s__unclassified_f__Ktedonobacteraceae
OTU745	0	0	0	0	0	0	1	0	0	0	0	0	0	0	0	0	0	0	7	0	0	0	0	0	1	0	0	14	0	0	k__Bacteria; p__Proteobacteria; c__Alphaproteobacteria; o__Sphingomonadales; f__Sphingomonadaceae; g__Novosphingobium; s__unclassified_g__Novosphingobium
OTU747	0	0	0	0	0	0	0	0	0	0	0	0	0	0	0	0	0	0	0	0	0	0	0	0	0	0	0	1	0	0	k__Bacteria; p__Proteobacteria; c__Gammaproteobacteria; o__Pseudomonadales; f__Pseudomonadaceae; g__Pseudomonas; s__unclassified_g__Pseudomonas
OTU748	0	0	0	0	0	0	0	0	0	0	0	0	0	0	0	0	0	0	0	0	0	0	0	0	0	0	0	2	0	0	k__Bacteria; p__Proteobacteria; c__Deltaproteobacteria; o__Myxococcales; f__Haliangiaceae; g__Haliangium; s__uncultured_Nannocystineae_bacterium_g__Haliangium
OTU749	0	0	0	0	0	0	0	0	0	0	0	0	0	0	0	0	0	0	0	0	0	0	0	0	0	0	0	1	0	0	k__Bacteria; p__Proteobacteria; c__Deltaproteobacteria; o__Oligoflexales; f__0319-6G20; g__norank_f__0319-6G20; s__unclassified_g__norank_f__0319-6G20
OTU750	0	0	0	0	0	0	0	0	0	0	0	0	0	0	0	0	0	0	0	0	0	0	0	0	0	0	0	2	0	0	k__Bacteria; p__Proteobacteria; c__Deltaproteobacteria; o__Bdellovibrionales; f__Bdellovibrionaceae; g__OM27_clade; s__unclassified_g__OM27_clade
OTU752	0	0	0	0	0	0	0	0	0	0	0	0	0	0	0	0	0	0	0	0	0	1	0	1	0	0	0	7	0	0	k__Bacteria; p__Actinobacteria; c__Actinobacteria; o__Frankiales; f__Acidothermaceae; g__Acidothermus; s__uncultured_actinobacterium_g__Acidothermus
OTU753	0	0	0	0	0	0	0	0	0	0	0	0	0	0	0	0	0	1	0	0	0	0	766	0	0	0	0	40	0	1	k__Bacteria; p__Proteobacteria; c__Gammaproteobacteria; o__unclassified_c__Gammaproteobacteria; f__unclassified_c__Gammaproteobacteria; g__unclassified_c__Gammaproteobacteria; s__unclassified_c__Gammaproteobacteria
OTU754	0	0	0	0	0	0	0	0	0	0	0	0	0	0	0	0	0	0	0	0	0	0	0	0	0	0	0	4	0	0	k__Bacteria; p__Proteobacteria; c__Alphaproteobacteria; o__Rhizobiales; f__Xanthobacteraceae; g__Afipia; s__unclassified_g__Afipia
OTU756	0	0	0	0	0	0	0	0	0	0	0	0	0	0	0	0	0	0	0	0	0	0	0	0	0	0	0	1	0	0	k__Bacteria; p__Proteobacteria; c__Gammaproteobacteria; o__Diplorickettsiales; f__Diplorickettsiaceae; g__norank_f__Diplorickettsiaceae; s__unclassified_g__norank_f__Diplorickettsiaceae
OTU758	0	0	0	0	0	0	0	0	0	0	0	0	0	0	0	0	0	0	0	0	0	0	0	0	0	0	0	16	0	0	k__Bacteria; p__Proteobacteria; c__Gammaproteobacteria; o__unclassified_c__Gammaproteobacteria; f__unclassified_c__Gammaproteobacteria; g__unclassified_c__Gammaproteobacteria; s__unclassified_c__Gammaproteobacteria
OTU759	0	0	0	0	0	0	0	0	0	0	0	0	0	0	0	0	0	0	0	18	0	0	0	0	1	0	0	3	0	1	k__Bacteria; p__Firmicutes; c__Bacilli; o__Bacillales; f__Planococcaceae; g__Lysinibacillus; s__Lysinibacillus_macroides_g__Lysinibacillus
OTU760	0	0	0	0	0	0	0	0	1	0	0	0	0	0	0	4	4	0	0	0	4	0	0	3	0	0	0	120	57	0	k__Bacteria; p__Proteobacteria; c__Gammaproteobacteria; o__Gammaproteobacteria_Incertae_Sedis; f__unclassified_o__Gammaproteobacteria_Incertae_Sedis; g__Acidibacter; s__uncultured_Steroidobacter_sp._g__Acidibacter
OTU761	0	0	0	0	0	0	0	0	0	0	0	0	0	0	0	0	0	0	0	0	0	0	0	0	0	0	0	2	0	0	k__Bacteria; p__Proteobacteria; c__Deltaproteobacteria; o__Myxococcales; f__Haliangiaceae; g__Haliangium; s__unclassified_g__Haliangium
OTU762	0	0	1	0	0	0	0	0	3	0	0	0	0	0	0	4	0	0	12	0	0	1	10	1	27	0	4	2	4	0	k__Bacteria; p__Proteobacteria; c__Alphaproteobacteria; o__Rhizobiales; f__Rhizobiaceae; g__Mesorhizobium; s__unclassified_g__Mesorhizobium
OTU763	0	0	0	0	0	0	0	0	0	0	0	0	0	0	0	0	0	0	0	0	0	0	0	0	0	0	0	1	0	0	k__Bacteria; p__Proteobacteria; c__Gammaproteobacteria; o__Betaproteobacteriales; f__Burkholderiaceae; g__Simplicispira; s__uncultured_bacterium_g__Simplicispira
OTU764	0	0	0	0	0	0	0	0	0	0	0	0	0	0	0	0	0	3	0	0	0	0	0	0	0	0	0	20	12	0	k__Bacteria; p__Proteobacteria; c__Gammaproteobacteria; o__Betaproteobacteriales; f__Burkholderiaceae; g__AAP99; s__metagenome_g__AAP99
OTU765	0	0	0	0	0	0	0	0	0	0	0	0	0	0	0	0	0	0	0	0	0	0	0	0	0	0	0	4	0	0	k__Bacteria; p__Proteobacteria; c__Alphaproteobacteria; o__Sphingomonadales; f__Sphingomonadaceae; g__Sphingomonas; s__unclassified_g__Sphingomonas
OTU766	0	0	0	0	0	1	0	0	0	0	0	0	0	0	0	0	3	0	0	0	0	0	0	0	0	0	0	109	0	0	k__Bacteria; p__Proteobacteria; c__Gammaproteobacteria; o__Gammaproteobacteria_Incertae_Sedis; f__unclassified_o__Gammaproteobacteria_Incertae_Sedis; g__Acidibacter; s__uncultured_gamma_proteobacterium_g__Acidibacter
OTU767	0	0	0	0	0	0	0	0	0	0	0	0	0	0	0	0	0	0	0	2	0	0	0	0	0	0	0	2	0	0	k__Bacteria; p__Deinococcus-Thermus; c__Deinococci; o__Deinococcales; f__Deinococcaceae; g__Deinococcus; s__uncultured_bacterium_g__Deinococcus
OTU768	0	0	0	0	0	0	0	1	0	0	0	0	0	0	0	0	0	0	0	0	0	0	0	0	0	0	0	10	0	0	k__Bacteria; p__Proteobacteria; c__Alphaproteobacteria; o__Sphingomonadales; f__Sphingomonadaceae; g__Sphingomonas; s__unclassified_g__Sphingomonas
OTU769	0	0	0	0	0	0	0	0	0	0	0	0	0	1	0	0	0	1	2	0	0	0	0	0	4	0	0	10	2	2	k__Bacteria; p__Actinobacteria; c__Actinobacteria; o__Solirubrobacterales; f__67-14; g__norank_f__67-14; s__metagenome_g__norank_f__67-14
OTU770	0	0	0	0	0	0	0	0	0	0	0	0	0	0	0	0	0	0	0	0	0	0	1	0	0	0	0	30	0	0	k__Bacteria; p__Acidobacteria; c__Acidobacteriia; o__Acidobacteriales; f__Acidobacteriaceae_Subgroup_1; g__Terriglobus; s__unclassified_g__Terriglobus
OTU771	0	0	0	0	0	0	0	0	0	0	0	0	0	0	0	0	0	0	0	1	0	0	0	0	0	0	0	20	0	0	k__Bacteria; p__Acidobacteria; c__Acidobacteriia; o__Acidobacteriales; f__Acidobacteriaceae_Subgroup_1; g__norank_f__Acidobacteriaceae_Subgroup_1; s__Acidobacterium_sp._pan6
OTU772	0	0	0	0	0	0	0	0	0	0	0	0	0	0	0	0	0	0	0	0	0	0	0	0	0	0	0	4	0	0	k__Bacteria; p__Firmicutes; c__Clostridia; o__Clostridiales; f__Clostridiaceae_1; g__Clostridium_sensu_stricto_12; s__uncultured_bacterium_g__Clostridium_sensu_stricto_12
OTU773	0	9	0	0	0	0	0	0	0	0	0	0	0	0	0	9	110	2	2	10	1	1	3	154	10	5	8	66	3	3	k__Bacteria; p__Actinobacteria; c__Actinobacteria; o__Corynebacteriales; f__Mycobacteriaceae; g__Mycobacterium; s__unclassified_g__Mycobacterium
OTU775	0	0	0	0	0	0	0	0	0	0	0	0	0	0	0	0	0	0	0	0	0	0	0	0	0	0	0	9	0	0	k__Bacteria; p__Proteobacteria; c__Alphaproteobacteria; o__Azospirillales; f__Inquilinaceae; g__Inquilinus; s__uncultured_bacterium_g__Inquilinus
OTU776	0	0	0	0	0	0	0	0	0	0	0	0	0	0	0	7	0	3	4	0	0	0	0	2	5	0	2	17	31	2	k__Bacteria; p__Actinobacteria; c__Actinobacteria; o__Micromonosporales; f__Micromonosporaceae; g__unclassified_f__Micromonosporaceae; s__unclassified_f__Micromonosporaceae
OTU777	0	0	0	0	0	0	0	0	0	0	0	0	0	0	0	0	0	0	0	0	0	0	0	0	0	0	0	13	0	0	k__Bacteria; p__Proteobacteria; c__Alphaproteobacteria; o__Sphingomonadales; f__Sphingomonadaceae; g__unclassified_f__Sphingomonadaceae; s__unclassified_f__Sphingomonadaceae
OTU779	0	0	0	0	0	0	0	0	0	0	0	0	0	0	0	0	0	0	0	0	0	0	1	0	0	0	0	2	0	0	k__Bacteria; p__Actinobacteria; c__Actinobacteria; o__Microtrichales; f__norank_o__Microtrichales; g__norank_o__Microtrichales; s__unclassified_g__norank_o__Microtrichales
OTU780	0	0	0	0	0	0	0	0	0	0	0	0	0	0	0	0	0	0	0	0	0	0	0	0	0	0	0	4	0	0	k__Bacteria; p__Proteobacteria; c__Gammaproteobacteria; o__Gammaproteobacteria_Incertae_Sedis; f__unclassified_o__Gammaproteobacteria_Incertae_Sedis; g__Candidatus_Berkiella; s__unclassified_g__Candidatus_Berkiella
OTU781	0	0	0	0	0	0	0	0	0	0	0	0	0	0	0	0	0	0	0	0	0	0	0	0	0	0	0	1	0	0	k__Bacteria; p__Proteobacteria; c__Alphaproteobacteria; o__Rhizobiales; f__Xanthobacteraceae; g__unclassified_f__Xanthobacteraceae; s__unclassified_f__Xanthobacteraceae
OTU782	0	0	0	0	0	0	0	0	0	0	0	0	0	0	0	0	0	0	0	0	0	0	0	0	0	0	0	13	0	0	k__Bacteria; p__Proteobacteria; c__Gammaproteobacteria; o__unclassified_c__Gammaproteobacteria; f__unclassified_c__Gammaproteobacteria; g__unclassified_c__Gammaproteobacteria; s__unclassified_c__Gammaproteobacteria
OTU783	0	0	0	0	0	0	0	0	0	0	0	0	0	0	0	0	0	0	0	0	0	0	2	0	1	0	0	1	0	0	k__Bacteria; p__Proteobacteria; c__Alphaproteobacteria; o__Rhizobiales; f__Beijerinckiaceae; g__unclassified_f__Beijerinckiaceae; s__unclassified_f__Beijerinckiaceae
OTU784	0	0	0	0	0	0	0	0	0	0	0	0	0	0	0	0	0	0	0	0	0	0	0	0	0	0	0	2	0	0	k__Bacteria; p__Proteobacteria; c__Alphaproteobacteria; o__Rhizobiales; f__Beijerinckiaceae; g__unclassified_f__Beijerinckiaceae; s__unclassified_f__Beijerinckiaceae
OTU785	0	0	0	0	0	0	0	0	0	0	0	0	0	0	0	1	1	0	0	0	0	0	0	0	1	0	0	5	10	1	k__Bacteria; p__Proteobacteria; c__unclassified_p__Proteobacteria; o__unclassified_p__Proteobacteria; f__unclassified_p__Proteobacteria; g__unclassified_p__Proteobacteria; s__unclassified_p__Proteobacteria
OTU787	0	2	0	0	0	0	0	0	0	0	0	0	0	0	0	0	0	0	0	0	0	0	1	0	0	0	0	0	0	0	k__Bacteria; p__Proteobacteria; c__Alphaproteobacteria; o__Azospirillales; f__Azospirillaceae; g__Azospirillum; s__Azospirillum_lipoferum_g__Azospirillum
OTU789	0	0	0	0	0	0	0	0	0	0	0	0	0	0	0	0	0	0	0	0	0	0	0	0	0	0	0	1	0	0	k__Bacteria; p__Bacteroidetes; c__Bacteroidia; o__Cytophagales; f__Microscillaceae; g__norank_f__Microscillaceae; s__uncultured_bacterium_g__norank_f__Microscillaceae
OTU790	0	0	0	0	0	0	0	0	0	0	0	0	0	0	0	0	0	0	0	0	0	0	0	0	0	0	0	1	0	0	k__Bacteria; p__Proteobacteria; c__Gammaproteobacteria; o__Gammaproteobacteria_Incertae_Sedis; f__unclassified_o__Gammaproteobacteria_Incertae_Sedis; g__Candidatus_Ovatusbacter; s__uncultured_bacterium_g__Candidatus_Ovatusbacter
OTU791	0	0	0	0	0	0	0	0	0	0	0	0	0	0	0	2	0	1	0	0	0	1	0	0	2	0	0	0	0	0	k__Bacteria; p__Proteobacteria; c__Alphaproteobacteria; o__Rhizobiales; f__Xanthobacteraceae; g__norank_f__Xanthobacteraceae; s__uncultured_forest_soil_bacterium_g__norank_f__Xanthobacteraceae
OTU793	0	0	0	0	0	0	0	0	0	0	0	0	0	0	0	0	0	0	0	0	0	0	0	0	0	0	0	1	2	0	k__Bacteria; p__Proteobacteria; c__Alphaproteobacteria; o__Azospirillales; f__Inquilinaceae; g__Inquilinus; s__uncultured_alpha_proteobacterium_g__Inquilinus
OTU794	0	0	0	0	0	0	0	0	0	0	0	0	0	0	0	0	0	1	0	0	0	0	0	0	0	0	0	22	0	0	k__Bacteria; p__Proteobacteria; c__Deltaproteobacteria; o__Myxococcales; f__Haliangiaceae; g__Haliangium; s__unclassified_g__Haliangium
OTU795	0	0	0	0	0	0	0	0	0	0	0	0	0	0	0	0	0	0	0	0	0	0	0	0	0	0	0	1	0	0	k__Bacteria; p__Proteobacteria; c__Alphaproteobacteria; o__Rhizobiales; f__Rhizobiaceae; g__Allorhizobium-Neorhizobium-Pararhizobium-Rhizobium; s__unclassified_g__Allorhizobium-Neorhizobium-Pararhizobium-Rhizobium
OTU796	0	0	0	0	0	0	0	0	0	0	0	0	0	0	0	0	0	0	0	0	0	0	0	0	1	0	0	3	0	0	k__Bacteria; p__Dependentiae; c__Babeliae; o__Babeliales; f__Vermiphilaceae; g__norank_f__Vermiphilaceae; s__uncultured_bacterium_g__norank_f__Vermiphilaceae
OTU797	0	0	0	0	0	0	0	0	0	0	0	0	0	0	0	0	0	0	0	0	0	0	0	0	1	0	0	9	0	0	k__Bacteria; p__Proteobacteria; c__Alphaproteobacteria; o__Rhizobiales; f__Labraceae; g__Labrys; s__unclassified_g__Labrys
OTU798	0	0	0	0	0	0	0	0	0	0	0	0	0	0	0	0	0	0	0	0	0	0	0	0	0	0	0	10	0	0	k__Bacteria; p__Firmicutes; c__Bacilli; o__Bacillales; f__Paenibacillaceae; g__Paenibacillus; s__metagenome_g__Paenibacillus
OTU799	0	0	0	0	0	0	0	0	0	0	0	0	0	0	0	0	0	0	2	0	0	2	4	0	0	0	0	4	0	0	k__Bacteria; p__Proteobacteria; c__Alphaproteobacteria; o__Micropepsales; f__Micropepsaceae; g__norank_f__Micropepsaceae; s__unclassified_g__norank_f__Micropepsaceae
OTU800	0	0	0	0	0	0	0	0	0	0	0	0	0	0	0	0	0	0	5	0	0	0	0	0	3	0	0	1	0	0	k__Bacteria; p__Proteobacteria; c__Gammaproteobacteria; o__Xanthomonadales; f__Rhodanobacteraceae; g__Chujaibacter; s__uncultured_bacterium_g__Chujaibacter
OTU801	0	0	0	0	0	0	0	0	0	0	0	0	0	0	0	0	0	0	0	0	1	0	0	0	0	0	0	6	3	0	k__Bacteria; p__Proteobacteria; c__Deltaproteobacteria; o__Myxococcales; f__Haliangiaceae; g__Haliangium; s__unclassified_g__Haliangium
OTU802	0	0	0	0	0	0	0	0	0	1	0	0	0	0	0	3	0	0	1	0	0	1	8	5	16	0	0	13	2	4	k__Bacteria; p__Proteobacteria; c__Gammaproteobacteria; o__Xanthomonadales; f__Rhodanobacteraceae; g__unclassified_f__Rhodanobacteraceae; s__unclassified_f__Rhodanobacteraceae
OTU803	1	0	1	0	1	0	0	0	1	1	2	0	0	0	0	0	2	0	0	2	0	0	0	0	0	0	0	33	0	0	k__Bacteria; p__Proteobacteria; c__Alphaproteobacteria; o__Rhizobiales; f__Rhizobiaceae; g__Allorhizobium-Neorhizobium-Pararhizobium-Rhizobium; s__unclassified_g__Allorhizobium-Neorhizobium-Pararhizobium-Rhizobium
OTU804	0	0	0	0	0	0	0	0	0	0	0	0	0	0	0	0	0	0	0	0	0	0	0	0	0	0	0	4	0	0	k__Bacteria; p__Chloroflexi; c__Ktedonobacteria; o__Ktedonobacterales; f__Ktedonobacteraceae; g__unclassified_f__Ktedonobacteraceae; s__unclassified_f__Ktedonobacteraceae
OTU806	0	0	0	0	0	0	0	0	0	0	0	3	0	0	0	0	0	0	0	0	0	0	0	0	0	0	0	3	0	1	k__Bacteria; p__Armatimonadetes; c__Fimbriimonadia; o__Fimbriimonadales; f__Fimbriimonadaceae; g__norank_f__Fimbriimonadaceae; s__unclassified_g__norank_f__Fimbriimonadaceae
OTU807	0	0	0	0	0	0	0	0	0	0	0	0	0	0	0	0	0	0	0	0	0	0	0	0	0	0	0	18	0	0	k__Bacteria; p__Proteobacteria; c__Gammaproteobacteria; o__Pseudomonadales; f__Pseudomonadaceae; g__Pseudomonas; s__unclassified_g__Pseudomonas
OTU808	0	0	0	0	0	0	0	0	0	0	0	0	0	0	0	0	0	0	0	0	0	0	0	0	0	0	0	1	0	0	k__Bacteria; p__Proteobacteria; c__Deltaproteobacteria; o__Oligoflexales; f__0319-6G20; g__norank_f__0319-6G20; s__unclassified_g__norank_f__0319-6G20
OTU809	0	0	0	0	0	0	0	0	0	0	0	0	0	0	0	0	0	0	0	0	0	0	0	0	0	0	0	1	0	0	k__Bacteria; p__unclassified_k__Bacteria; c__unclassified_k__norank_d__Bacteria; p__unclassified_k__Bacteria; p__unclassified_k__Bacteria; p__unclassified_k__Bacteria; p__unclassified_k__Bacteria
OTU812	0	0	0	0	0	0	0	0	0	0	0	0	0	0	0	0	0	0	0	0	0	0	0	0	0	0	0	1	0	0	k__Bacteria; p__Acidobacteria; c__Acidobacteriia; o__Solibacterales; f__Solibacteraceae_Subgroup_3; g__Bryobacter; s__unclassified_g__Bryobacter
OTU813	0	0	0	0	0	0	0	0	0	0	0	0	0	0	0	0	0	0	0	0	0	0	2	0	0	0	0	0	0	0	k__Bacteria; p__Proteobacteria; c__Alphaproteobacteria; o__Caulobacterales; f__Hyphomonadaceae; g__Hirschia; s__metagenome_g__Hirschia
OTU814	0	0	0	0	0	0	0	0	0	0	0	0	0	0	0	0	0	0	0	0	0	0	0	0	0	11	0	6	0	0	k__Bacteria; p__Proteobacteria; c__Gammaproteobacteria; o__Betaproteobacteriales; f__Burkholderiaceae; g__unclassified_f__Burkholderiaceae; s__unclassified_f__Burkholderiaceae
OTU815	0	0	0	0	0	0	0	0	0	0	0	0	0	0	0	0	0	0	0	1	0	8	0	0	3	0	17	0	8	0	k__Bacteria; p__Actinobacteria; c__Actinobacteria; o__Streptomycetales; f__Streptomycetaceae; g__Streptomyces; s__Streptomyces_griseoruber
OTU816	0	0	0	0	0	0	0	0	0	0	0	0	0	0	0	0	0	0	0	0	0	0	0	0	0	0	0	0	2	0	k__Bacteria; p__Firmicutes; c__Bacilli; o__Bacillales; f__Paenibacillaceae; g__Paenibacillus; s__unclassified_g__Paenibacillus
OTU818	0	0	0	0	0	0	0	0	0	0	0	0	0	0	0	0	0	0	1	0	0	0	0	0	0	0	0	0	40	0	k__Bacteria; p__Actinobacteria; c__Actinobacteria; o__Streptosporangiales; f__Streptosporangiaceae; g__Nonomuraea; s__unclassified_g__Nonomuraea
OTU819	0	0	0	0	0	0	0	0	0	0	0	0	0	0	0	0	0	0	0	0	0	0	0	8	0	0	0	0	41	2	k__Bacteria; p__Actinobacteria; c__Actinobacteria; o__Pseudonocardiales; f__Pseudonocardiaceae; g__Kibdelosporangium; s__Kibdelosporangium_lantanae
OTU820	0	0	0	0	0	0	0	0	0	0	0	0	0	0	0	0	4	0	0	1	0	0	0	0	10	0	0	0	8	2	k__Bacteria; p__Actinobacteria; c__Actinobacteria; o__Streptosporangiales; f__Streptosporangiaceae; g__Microbispora; s__Microbispora_rosea_subsp._rosea
OTU821	0	0	0	0	0	0	0	0	0	0	0	0	0	0	0	0	0	15	0	0	0	0	0	0	0	0	6	0	62	0	k__Bacteria; p__unclassified_k__Bacteria; c__unclassified_k__norank_d__Bacteria; p__unclassified_k__Bacteria; p__unclassified_k__Bacteria; p__unclassified_k__Bacteria; p__unclassified_k__Bacteria
OTU822	0	0	0	0	0	0	0	0	0	0	0	0	0	0	0	0	0	0	0	0	0	0	0	0	0	0	0	0	74	0	k__Bacteria; p__unclassified_k__Bacteria; c__unclassified_k__norank_d__Bacteria; p__unclassified_k__Bacteria; p__unclassified_k__Bacteria; p__unclassified_k__Bacteria; p__unclassified_k__Bacteria
OTU823	0	0	0	0	0	0	0	0	0	0	0	0	0	0	0	0	0	0	0	0	0	0	0	0	0	0	0	0	2	0	k__Bacteria; p__Bacteroidetes; c__Bacteroidia; o__Chitinophagales; f__norank_o__Chitinophagales; g__norank_o__Chitinophagales; s__unclassified_g__norank_o__Chitinophagales
OTU824	1	0	0	0	0	0	0	0	0	0	0	0	0	0	0	0	2	2	0	0	0	0	0	0	0	0	0	0	6	0	k__Bacteria; p__Firmicutes; c__Bacilli; o__Bacillales; f__Paenibacillaceae; g__Paenibacillus; s__unclassified_g__Paenibacillus
OTU825	0	1	0	0	0	1	0	0	0	0	0	0	0	0	0	0	0	6	0	0	1	0	2	3	0	0	0	0	2	0	k__Bacteria; p__Proteobacteria; c__Gammaproteobacteria; o__Betaproteobacteriales; f__Burkholderiaceae; g__norank_f__Burkholderiaceae; s__Ideonella_sp._g__norank
OTU828	0	0	0	0	0	0	0	0	0	0	0	0	0	0	0	0	0	0	0	0	0	0	0	0	0	0	0	0	3	0	k__Bacteria; p__Patescibacteria; c__Saccharimonadia; o__Saccharimonadales; f__norank_o__Saccharimonadales; g__norank_o__Saccharimonadales; s__uncultured_Candidatus_Saccharibacteria_bacterium_g__norank_o__Saccharimonadales
OTU829	0	0	0	0	0	0	0	0	0	0	0	0	0	0	0	0	0	0	0	5	0	0	0	11	0	0	2	0	5	0	k__Bacteria; p__unclassified_k__Bacteria; c__unclassified_k__norank_d__Bacteria; p__unclassified_k__Bacteria; p__unclassified_k__Bacteria; p__unclassified_k__Bacteria; p__unclassified_k__Bacteria
OTU830	0	0	0	0	0	0	0	0	0	0	0	0	0	0	0	0	0	0	0	0	0	0	0	0	0	0	0	0	2	0	k__Bacteria; p__Proteobacteria; c__Gammaproteobacteria; o__unclassified_c__Gammaproteobacteria; f__unclassified_c__Gammaproteobacteria; g__unclassified_c__Gammaproteobacteria; s__unclassified_c__Gammaproteobacteria
OTU831	0	0	0	1	0	0	0	0	0	0	0	0	0	0	0	0	0	0	4	0	0	0	27	1	0	0	17	2	11	2	k__Bacteria; p__Proteobacteria; c__Gammaproteobacteria; o__Betaproteobacteriales; f__Burkholderiaceae; g__unclassified_f__Burkholderiaceae; s__unclassified_f__Burkholderiaceae
OTU832	0	0	0	0	0	0	0	0	0	0	0	0	0	0	0	0	0	1	0	0	0	0	0	0	0	0	4	0	2	1	k__Bacteria; p__Bacteroidetes; c__Bacteroidia; o__Chitinophagales; f__Chitinophagaceae; g__unclassified_f__Chitinophagaceae; s__unclassified_f__Chitinophagaceae
OTU833	0	0	0	10	0	6	28	0	0	0	0	0	0	0	0	0	0	0	8	0	1	1	1	1	14	0	0	0	0	7	k__Bacteria; p__Proteobacteria; c__Gammaproteobacteria; o__Betaproteobacteriales; f__Burkholderiaceae; g__Massilia; s__unclassified_g__Massilia
OTU834	0	0	0	0	0	0	0	0	0	0	0	0	0	0	0	0	6	0	0	0	0	0	0	3	0	0	0	0	33	0	k__Bacteria; p__unclassified_k__Bacteria; c__unclassified_k__norank_d__Bacteria; p__unclassified_k__Bacteria; p__unclassified_k__Bacteria; p__unclassified_k__Bacteria; p__unclassified_k__Bacteria
OTU835	0	0	0	0	0	0	0	0	0	0	0	0	0	0	0	0	0	0	0	1	0	0	0	1	0	0	0	0	2	0	k__Bacteria; p__Planctomycetes; c__Phycisphaerae; o__Phycisphaerales; f__Phycisphaeraceae; g__SM1A02; s__unclassified_g__SM1A02
OTU836	0	0	0	0	0	0	0	0	0	0	0	0	0	0	0	0	0	0	0	0	0	0	6	0	2	0	2	3	4	0	k__Bacteria; p__Proteobacteria; c__Alphaproteobacteria; o__Dongiales; f__Dongiaceae; g__Dongia; s__uncultured_Rhodospirillaceae_bacterium_g__Dongia
OTU837	0	0	0	0	0	0	0	0	0	0	0	0	0	0	0	0	0	0	0	0	0	0	0	0	0	0	0	0	3	0	k__Bacteria; p__Actinobacteria; c__Actinobacteria; o__Streptosporangiales; f__Streptosporangiaceae; g__Sphaerisporangium; s__unclassified_g__Sphaerisporangium
OTU839	0	0	14	0	11	2	0	2	0	9	11	0	7	0	0	0	0	5	2	1	0	0	11	0	2	0	3	0	2	1	k__Bacteria; p__Proteobacteria; c__Gammaproteobacteria; o__Betaproteobacteriales; f__Burkholderiaceae; g__Pelomonas; s__unclassified_g__Pelomonas
OTU840	0	0	0	0	0	0	0	0	0	0	0	0	0	0	0	0	0	0	0	0	0	0	0	0	0	0	0	3	147	0	k__Bacteria; p__Proteobacteria; c__Alphaproteobacteria; o__Dongiales; f__Dongiaceae; g__Dongia; s__Dongia_sp._GR1-03
OTU841	0	0	0	0	0	0	0	0	0	0	0	0	0	0	0	0	0	0	0	0	0	0	0	0	0	0	0	0	1	0	k__Bacteria; p__Firmicutes; c__Bacilli; o__Bacillales; f__Paenibacillaceae; g__norank_f__Paenibacillaceae; s__uncultured_bacterium_g__norank_f__Paenibacillaceae
OTU842	0	0	0	0	0	0	0	0	0	0	0	0	0	0	0	0	0	0	13	8	0	0	0	0	0	0	1	0	61	0	k__Bacteria; p__Actinobacteria; c__Actinobacteria; o__Pseudonocardiales; f__Pseudonocardiaceae; g__unclassified_f__Pseudonocardiaceae; s__unclassified_f__Pseudonocardiaceae
OTU843	0	0	0	0	0	0	0	0	0	0	0	0	0	0	0	0	0	0	0	193	0	0	0	1	0	0	193	0	7	0	k__Bacteria; p__unclassified_k__Bacteria; c__unclassified_k__norank_d__Bacteria; p__unclassified_k__Bacteria; p__unclassified_k__Bacteria; p__unclassified_k__Bacteria; p__unclassified_k__Bacteria
OTU844	0	0	0	0	0	0	0	0	0	0	0	0	0	0	0	0	0	0	0	0	0	0	0	0	0	0	4	0	1	0	k__Bacteria; p__unclassified_k__Bacteria; c__unclassified_k__norank_d__Bacteria; p__unclassified_k__Bacteria; p__unclassified_k__Bacteria; p__unclassified_k__Bacteria; p__unclassified_k__Bacteria
OTU845	0	0	0	0	0	0	0	0	0	0	0	0	0	0	0	0	0	0	0	0	0	0	0	0	0	0	0	0	2	1	k__Bacteria; p__Actinobacteria; c__Actinobacteria; o__Solirubrobacterales; f__67-14; g__norank_f__67-14; s__uncultured_bacterium_g__norank_f__67-14
OTU846	0	0	0	0	0	0	0	0	0	0	0	0	0	0	0	0	0	0	0	0	0	0	0	0	0	0	0	0	4	0	k__Bacteria; p__Firmicutes; c__Bacilli; o__Bacillales; f__Bacillaceae; g__Pseudogracilibacillus; s__Pseudogracilibacillus_auburnensis
OTU847	0	0	0	0	0	0	0	0	0	0	0	0	0	0	0	0	0	0	0	0	0	0	0	0	0	0	0	0	2	0	k__Bacteria; p__Planctomycetes; c__Phycisphaerae; o__Phycisphaerales; f__Phycisphaeraceae; g__SM1A02; s__metagenome_g__SM1A02
OTU848	0	0	0	0	0	0	0	0	0	0	0	0	0	0	0	0	0	0	0	0	0	0	0	0	0	0	4	0	2	0	k__Bacteria; p__Actinobacteria; c__Actinobacteria; o__Streptosporangiales; f__Streptosporangiaceae; g__Sphaerisporangium; s__uncultured_bacterium_g__Sphaerisporangium
OTU849	0	0	0	0	0	0	0	0	0	0	0	0	0	0	0	0	0	0	0	0	0	0	3	0	0	0	0	0	3	0	k__Bacteria; p__Bacteroidetes; c__Bacteroidia; o__Sphingobacteriales; f__NS11-12_marine_group; g__norank_f__NS11-12_marine_group; s__unclassified_g__norank_f__NS11-12_marine_group
OTU850	0	0	0	0	0	0	0	0	0	0	0	0	0	0	0	0	9	0	0	0	0	0	578	0	0	0	0	6	42	0	k__Bacteria; p__Bacteroidetes; c__Bacteroidia; o__Cytophagales; f__Microscillaceae; g__Ohtaekwangia; s__unclassified_g__Ohtaekwangia
OTU851	0	0	0	0	0	0	0	0	0	0	0	0	0	0	0	0	1	0	0	0	0	0	0	0	0	0	0	0	2	0	k__Bacteria; p__unclassified_k__Bacteria; c__unclassified_k__norank_d__Bacteria; p__unclassified_k__Bacteria; p__unclassified_k__Bacteria; p__unclassified_k__Bacteria; p__unclassified_k__Bacteria
OTU852	0	0	0	0	0	0	0	0	0	0	0	0	0	0	0	0	0	0	0	0	0	0	0	0	0	0	0	0	3	0	k__Bacteria; p__Proteobacteria; c__Alphaproteobacteria; o__Sphingomonadales; f__Sphingomonadaceae; g__Sphingomonas; s__unclassified_g__Sphingomonas
OTU853	0	0	0	0	0	0	0	0	0	0	0	0	0	0	0	0	0	0	0	0	0	0	0	0	0	0	0	0	1	0	k__Bacteria; p__Acidobacteria; c__Acidobacteriia; o__Solibacterales; f__Solibacteraceae_Subgroup_3; g__Bryobacter; s__unclassified_g__Bryobacter
OTU854	0	0	5	1	0	0	0	0	0	0	0	0	0	0	3	0	0	0	1	0	0	0	0	1	0	0	0	0	1	0	k__Bacteria; p__Proteobacteria; c__Alphaproteobacteria; o__Rhizobiales; f__Beijerinckiaceae; g__Methylobacterium; s__unclassified_g__Methylobacterium
OTU855	0	0	0	0	0	0	0	0	0	0	0	0	0	0	0	0	0	0	0	1	0	0	0	0	0	0	0	0	6	0	k__Bacteria; p__unclassified_k__Bacteria; c__unclassified_k__norank_d__Bacteria; p__unclassified_k__Bacteria; p__unclassified_k__Bacteria; p__unclassified_k__Bacteria; p__unclassified_k__Bacteria
OTU856	0	0	0	0	0	0	0	0	0	0	0	0	0	0	0	0	0	0	0	0	0	0	9	0	0	0	0	0	1	0	k__Bacteria; p__Bacteroidetes; c__Bacteroidia; o__Cytophagales; f__Microscillaceae; g__norank_f__Microscillaceae; s__metagenome_g__norank_f__Microscillaceae
OTU857	0	0	0	0	0	0	0	0	0	0	0	0	0	0	0	0	0	0	0	0	0	0	0	0	0	0	0	0	4	0	k__Bacteria; p__unclassified_k__Bacteria; c__unclassified_k__norank_d__Bacteria; p__unclassified_k__Bacteria; p__unclassified_k__Bacteria; p__unclassified_k__Bacteria; p__unclassified_k__Bacteria
OTU859	0	0	0	0	0	0	0	0	0	0	0	0	0	0	0	0	0	0	0	0	0	0	0	0	0	0	0	0	1	0	k__Bacteria; p__Dependentiae; c__Babeliae; o__Babeliales; f__Vermiphilaceae; g__norank_f__Vermiphilaceae; s__unclassified_g__norank_f__Vermiphilaceae
OTU860	0	0	0	0	0	0	0	0	0	0	0	0	0	0	0	0	0	0	0	0	0	0	2	0	0	0	0	0	0	0	k__Bacteria; p__Actinobacteria; c__Actinobacteria; o__Streptosporangiales; f__Streptosporangiaceae; g__Sphaerimonospora; s__unclassified_g__Sphaerimonospora
OTU861	0	0	0	0	0	0	0	0	0	0	0	0	0	0	0	0	1334	85	78	1	10	0	0	133	1	0	2	1	1408	2	k__Bacteria; p__Actinobacteria; c__Actinobacteria; o__Pseudonocardiales; f__Pseudonocardiaceae; g__unclassified_f__Pseudonocardiaceae; s__unclassified_f__Pseudonocardiaceae
OTU862	0	0	0	0	0	0	0	0	0	0	0	0	0	0	0	0	0	0	0	0	0	0	0	0	0	0	0	1	0	0	k__Bacteria; p__Firmicutes; c__Bacilli; o__Bacillales; f__Bacillaceae; g__Bacillus; s__Bacillus_horti
OTU863	0	0	0	0	0	0	0	0	0	0	0	0	0	0	0	0	0	0	0	0	0	0	0	0	0	0	0	0	4	0	k__Bacteria; p__unclassified_k__Bacteria; c__unclassified_k__norank_d__Bacteria; p__unclassified_k__Bacteria; p__unclassified_k__Bacteria; p__unclassified_k__Bacteria; p__unclassified_k__Bacteria
OTU864	1	0	0	0	0	0	0	0	0	0	0	0	0	0	0	0	0	0	0	4	0	0	0	0	0	0	0	0	1	3	k__Bacteria; p__Actinobacteria; c__Actinobacteria; o__Gaiellales; f__norank_o__Gaiellales; g__norank_o__Gaiellales; s__unclassified_g__norank_o__Gaiellales
OTU865	0	0	0	0	0	0	0	0	0	0	0	0	0	0	0	0	0	0	0	0	0	0	0	0	0	0	0	0	3	0	k__Bacteria; p__Firmicutes; c__Bacilli; o__Bacillales; f__Bacillaceae; g__unclassified_f__Bacillaceae; s__unclassified_f__Bacillaceae
OTU866	0	0	0	0	0	0	0	0	0	0	0	0	0	0	0	0	4	0	3	0	0	0	0	1	1	0	0	0	1580	2	k__Bacteria; p__Actinobacteria; c__Actinobacteria; o__Streptosporangiales; f__Thermomonosporaceae; g__Actinomadura; s__unclassified_g__Actinomadura
OTU867	0	0	0	0	0	0	0	0	0	0	0	0	0	0	0	0	0	0	0	0	0	0	0	0	3	0	0	0	1	0	k__Bacteria; p__Proteobacteria; c__Alphaproteobacteria; o__Rhizobiales; f__Rhizobiales_Incertae_Sedis; g__Bauldia; s__metagenome_g__Bauldia
OTU868	0	0	0	0	0	0	0	0	0	0	0	0	0	0	0	0	0	0	0	0	0	0	0	0	0	0	0	0	6	0	k__Bacteria; p__Firmicutes; c__Bacilli; o__Bacillales; f__Paenibacillaceae; g__Paenibacillus; s__Paenibacillus_fonticola
OTU869	0	0	0	0	0	0	0	0	0	0	0	0	0	0	0	5	0	0	8	1	0	0	0	0	6	0	0	0	12	12	k__Bacteria; p__Actinobacteria; c__Actinobacteria; o__Micromonosporales; f__Micromonosporaceae; g__Luedemannella; s__uncultured_bacterium_g__Luedemannella
OTU870	0	0	0	0	0	0	0	0	0	0	0	0	0	0	0	0	0	0	0	0	0	0	0	0	0	0	0	0	5	0	k__Bacteria; p__Proteobacteria; c__Alphaproteobacteria; o__Caulobacterales; f__Caulobacteraceae; g__norank_f__Caulobacteraceae; s__uncultured_Caulobacter_sp._g__norank
OTU871	0	2	0	0	0	0	0	0	0	0	0	0	0	0	0	0	0	1	1	0	0	0	1	0	8	0	0	0	2	2	k__Bacteria; p__Proteobacteria; c__Alphaproteobacteria; o__Rhizobiales; f__Hyphomicrobiaceae; g__unclassified_f__Hyphomicrobiaceae; s__unclassified_f__Hyphomicrobiaceae
OTU872	0	0	0	0	0	0	0	0	0	0	0	0	0	0	0	0	0	0	0	0	0	0	0	0	0	0	0	0	2	0	k__Bacteria; p__Proteobacteria; c__Gammaproteobacteria; o__unclassified_c__Gammaproteobacteria; f__unclassified_c__Gammaproteobacteria; g__unclassified_c__Gammaproteobacteria; s__unclassified_c__Gammaproteobacteria
OTU873	0	0	0	0	0	0	0	0	0	0	0	0	0	0	0	0	0	0	0	0	0	0	0	2	0	0	0	0	16	0	k__Bacteria; p__unclassified_k__Bacteria; c__unclassified_k__norank_d__Bacteria; p__unclassified_k__Bacteria; p__unclassified_k__Bacteria; p__unclassified_k__Bacteria; p__unclassified_k__Bacteria
OTU874	0	0	0	0	4	0	0	0	0	0	0	0	0	1	0	0	0	1	0	2	0	0	0	0	0	0	1	0	13	9	k__Bacteria; p__Firmicutes; c__Bacilli; o__Bacillales; f__Planococcaceae; g__Psychrobacillus; s__Bacillus_sp._FJAT-22090
OTU875	0	0	0	0	0	0	0	0	0	0	0	0	0	0	0	0	0	0	0	0	0	0	2	0	0	0	0	0	1	0	k__Bacteria; p__Proteobacteria; c__Alphaproteobacteria; o__Rhizobiales; f__Xanthobacteraceae; g__norank_f__Xanthobacteraceae; s__unclassified_g__norank_f__Xanthobacteraceae
OTU876	0	0	0	0	0	0	0	1	0	0	0	0	0	0	0	1	0	0	0	0	0	0	0	3	0	1	2	0	3	0	k__Bacteria; p__Proteobacteria; c__Gammaproteobacteria; o__unclassified_c__Gammaproteobacteria; f__unclassified_c__Gammaproteobacteria; g__unclassified_c__Gammaproteobacteria; s__unclassified_c__Gammaproteobacteria
OTU877	4	3	2	0	0	7	0	0	0	0	0	0	10	0	0	0	1	0	0	9	0	1	0	2	5	0	0	1	1	2	k__Bacteria; p__Actinobacteria; c__Actinobacteria; o__Corynebacteriales; f__Nocardiaceae; g__Rhodococcus; s__Rhodococcus_erythropolis
OTU878	0	0	0	0	0	0	0	0	0	0	0	0	0	0	0	0	0	0	0	0	0	0	0	0	0	0	0	0	0	57	k__Bacteria; p__Bacteroidetes; c__Bacteroidia; o__Bacteroidales; f__Bacteroidaceae; g__Bacteroides; s__Bacteroides_vulgatus
OTU879	0	0	0	0	0	0	0	0	0	0	0	0	0	0	0	0	0	0	0	0	0	0	0	0	0	0	0	0	0	24	k__Bacteria; p__Bacteroidetes; c__Bacteroidia; o__Bacteroidales; f__Bacteroidaceae; g__Bacteroides; s__Bacteroides_ovatus
OTU880	0	61	0	0	0	0	0	0	0	0	0	0	4	0	0	1	0	0	0	2	0	0	0	0	0	0	0	0	0	1	k__Bacteria; p__Firmicutes; c__Bacilli; o__Lactobacillales; f__Lactobacillaceae; g__Lactobacillus; s__Lactobacillus_pentosus_g__Lactobacillus
OTU881	0	0	0	0	0	0	0	0	0	0	0	0	0	0	0	0	0	0	0	0	0	0	0	0	0	0	0	0	0	13	k__Bacteria; p__Firmicutes; c__Clostridia; o__Clostridiales; f__Ruminococcaceae; g__Butyricicoccus; s__unclassified_g__Butyricicoccus
OTU883	0	0	0	0	0	0	0	0	0	0	0	0	0	0	0	0	0	0	0	0	0	0	0	0	0	0	0	0	0	3	k__Bacteria; p__Bacteroidetes; c__Bacteroidia; o__Bacteroidales; f__Bacteroidaceae; g__Bacteroides; s__unclassified_g__Bacteroides
OTU884	197	541	682	611	786	860	667	813	723	869	792	223	1154	134	956	945	712	178	45	465	35	12	139	136	203	6	605	2	170	131	k__Bacteria; p__Proteobacteria; c__Gammaproteobacteria; o__Betaproteobacteriales; f__Burkholderiaceae; g__Acidovorax; s__Acidovorax_citrulli
OTU885	0	0	0	0	0	0	0	0	0	0	0	0	0	0	0	0	0	0	0	0	0	0	0	0	0	0	0	0	0	23	k__Bacteria; p__Firmicutes; c__Clostridia; o__Clostridiales; f__Lachnospiraceae; g__Lachnoclostridium; s__uncultured_Firmicutes_bacterium_g__Lachnoclostridium
OTU886	1	0	0	0	0	1	0	0	0	0	0	0	0	0	0	0	11	0	111	20	0	0	5	0	2084	1	26	2	576	12	k__Bacteria; p__Actinobacteria; c__Actinobacteria; o__Streptomycetales; f__Streptomycetaceae; g__Streptomyces; s__unclassified_g__Streptomyces
OTU887	1	0	0	0	0	0	0	0	0	0	0	0	0	0	0	0	0	0	0	0	0	0	0	0	8	0	0	0	0	14	k__Bacteria; p__Gemmatimonadetes; c__Gemmatimonadetes; o__Gemmatimonadales; f__Gemmatimonadaceae; g__norank_f__Gemmatimonadaceae; s__uncultured_Gemmatimonadales_bacterium_g__norank
OTU888	0	0	0	0	0	0	0	0	0	0	0	0	0	0	0	0	0	0	0	0	0	0	0	0	0	0	0	0	0	3	k__Bacteria; p__Bacteroidetes; c__Bacteroidia; o__Bacteroidales; f__Rikenellaceae; g__Alistipes; s__Faecalibacterium_prausnitzii_g__Alistipes
OTU890	0	0	0	0	0	0	0	0	0	0	0	0	0	0	0	0	0	0	0	0	0	0	0	0	0	0	0	0	0	4	k__Bacteria; p__Firmicutes; c__Clostridia; o__Clostridiales; f__Lachnospiraceae; g__Fusicatenibacter; s__unclassified_g__Fusicatenibacter
OTU891	0	0	0	0	0	0	0	0	0	0	0	0	0	0	0	0	0	0	0	0	0	0	0	0	0	0	0	0	0	6	k__Bacteria; p__Proteobacteria; c__Alphaproteobacteria; o__Rhizobiales; f__Beijerinckiaceae; g__Microvirga; s__unclassified_g__Microvirga
OTU892	0	0	0	0	0	0	0	0	0	0	0	0	0	0	0	0	0	0	0	0	0	0	0	0	0	0	0	0	0	1	k__Bacteria; p__Actinobacteria; c__Actinobacteria; o__Streptomycetales; f__Streptomycetaceae; g__Streptomyces; s__unclassified_g__Streptomyces
OTU893	0	0	0	0	0	0	0	0	0	0	0	0	0	0	0	0	0	0	0	0	0	0	0	0	0	0	0	0	0	23	k__Bacteria; p__Firmicutes; c__Clostridia; o__Clostridiales; f__Ruminococcaceae; g__Ruminococcus_1; s__metagenome_g__Ruminococcus_1
OTU894	0	0	0	0	0	0	0	0	0	0	0	0	0	0	0	0	0	0	0	0	0	0	0	0	0	0	0	0	0	33	k__Bacteria; p__Actinobacteria; c__Actinobacteria; o__Solirubrobacterales; f__67-14; g__norank_f__67-14; s__uncultured_Rubrobacteria_bacterium_g__norank_f__67-14
OTU895	0	0	0	0	0	0	0	0	0	0	0	0	0	0	0	0	0	0	0	0	0	0	0	0	0	0	0	0	0	1372	k__Bacteria; p__Bacteroidetes; c__Bacteroidia; o__Bacteroidales; f__Prevotellaceae; g__Prevotella_9; s__metagenome_g__Prevotella_9
OTU896	0	0	0	0	0	0	0	0	0	0	0	0	0	0	0	0	0	0	0	0	0	0	0	0	0	0	0	0	0	3	k__Bacteria; p__Actinobacteria; c__Actinobacteria; o__Solirubrobacterales; f__67-14; g__norank_f__67-14; s__uncultured_actinobacterium_g__norank_f__67-14
OTU897	0	0	0	0	0	0	0	0	0	0	0	0	0	0	0	0	0	0	0	0	0	0	0	0	0	0	0	0	0	28	k__Bacteria; p__Bacteroidetes; c__Bacteroidia; o__Bacteroidales; f__Tannerellaceae; g__Parabacteroides; s__Parabacteroides_distasonis
OTU898	0	0	0	0	0	0	0	0	0	0	0	0	0	0	0	0	0	0	0	0	0	0	0	0	1	0	0	0	0	1	k__Bacteria; p__Actinobacteria; c__Actinobacteria; o__norank_c__Actinobacteria; f__norank_c__Actinobacteria; g__norank_c__Actinobacteria; s__unclassified_g__norank_c__Actinobacteria
OTU899	2	31	32	2	18	14	13	15	13	13	25	2	14	1	11	9	25	13	1	3	0	0	145	2	0	0	4	0	1	1	k__Bacteria; p__Proteobacteria; c__Alphaproteobacteria; o__Caulobacterales; f__Caulobacteraceae; g__Phenylobacterium; s__uncultured_bacterium_g__Phenylobacterium
OTU900	0	0	0	0	0	0	0	0	0	0	0	0	0	0	0	0	0	0	0	0	0	0	0	0	0	0	0	0	0	2	k__Bacteria; p__Proteobacteria; c__Deltaproteobacteria; o__Myxococcales; f__norank_o__Myxococcales; g__norank_o__Myxococcales; s__uncultured_bacterium_g__norank_o__Myxococcales
OTU901	0	0	0	0	0	0	0	0	0	0	0	0	0	0	0	18	4	51	6	9	0	0	57	0	7	0	50	132	18	27	k__Bacteria; p__Proteobacteria; c__Gammaproteobacteria; o__Gammaproteobacteria_Incertae_Sedis; f__unclassified_o__Gammaproteobacteria_Incertae_Sedis; g__Acidibacter; s__metagenome_g__Acidibacter
OTU902	0	0	0	0	0	0	0	0	0	0	0	0	0	0	0	0	0	0	0	0	0	0	0	0	0	0	0	0	0	1	k__Bacteria; p__Proteobacteria; c__Deltaproteobacteria; o__Oligoflexales; f__0319-6G20; g__norank_f__0319-6G20; s__unclassified_g__norank_f__0319-6G20
OTU903	0	0	0	0	0	0	0	0	0	0	0	0	0	0	0	0	0	0	0	0	0	0	0	0	0	0	0	0	0	21	k__Bacteria; p__Actinobacteria; c__Actinobacteria; o__Rubrobacterales; f__Rubrobacteriaceae; g__Rubrobacter; s__uncultured_Rubrobacter_sp.
OTU904	0	0	0	0	0	0	0	0	1	0	0	0	0	0	0	0	0	0	0	0	0	0	0	0	2	0	0	0	0	1	k__Bacteria; p__Proteobacteria; c__Alphaproteobacteria; o__Sphingomonadales; f__Sphingomonadaceae; g__Sphingomonas; s__uncultured_Sphingomonadaceae_bacterium_g__Sphingomonas
OTU905	0	0	0	0	0	0	0	0	0	0	0	0	0	0	0	0	0	0	0	0	0	0	0	0	0	0	0	0	0	3	k__Bacteria; p__Firmicutes; c__Clostridia; o__Clostridiales; f__Lachnospiraceae; g__Blautia; s__Ruminococcus_sp._5_1_39BFAA
OTU906	0	0	0	0	0	0	0	0	0	0	0	0	0	0	0	0	0	0	0	0	0	0	0	0	0	0	0	0	0	2	k__Bacteria; p__Actinobacteria; c__Actinobacteria; o__Solirubrobacterales; f__67-14; g__norank_f__67-14; s__unclassified_g__norank_f__67-14
OTU907	0	0	0	0	0	0	0	2	0	0	0	0	0	0	0	0	0	1	0	0	0	0	0	0	0	0	0	0	0	1	k__Bacteria; p__Firmicutes; c__Bacilli; o__Lactobacillales; f__Streptococcaceae; g__Streptococcus; s__Streptococcus_salivarius_subsp._thermophilus
OTU909	0	0	0	0	0	0	0	0	0	0	0	0	0	0	0	0	0	0	0	0	0	0	0	0	0	0	0	0	0	3	k__Bacteria; p__Firmicutes; c__Clostridia; o__Clostridiales; f__Lachnospiraceae; g__Tyzzerella; s__uncultured_organism_g__Tyzzerella
OTU910	0	0	0	0	0	0	0	0	0	0	0	0	0	0	0	0	0	0	0	0	0	0	0	0	0	0	0	0	0	2	k__Bacteria; p__Actinobacteria; c__Actinobacteria; o__Microtrichales; f__norank_o__Microtrichales; g__norank_o__Microtrichales; s__uncultured_bacterium_g__norank_o__Microtrichales
OTU911	0	0	0	0	0	0	0	0	0	0	0	0	0	0	0	0	0	0	0	0	0	0	0	0	0	0	0	0	0	28	k__Bacteria; p__Bacteroidetes; c__Bacteroidia; o__Bacteroidales; f__Tannerellaceae; g__Parabacteroides; s__gut_metagenome_g__Parabacteroides
OTU912	0	0	0	0	0	0	0	0	0	0	0	0	0	0	0	0	0	0	0	0	0	0	0	0	0	0	0	0	0	1	k__Bacteria; p__Proteobacteria; c__Alphaproteobacteria; o__Acetobacterales; f__Acetobacteraceae; g__unclassified_f__Acetobacteraceae; s__unclassified_f__Acetobacteraceae
OTU913	0	0	0	0	0	0	0	0	0	0	0	0	0	0	0	0	0	0	0	0	0	0	0	0	0	0	0	0	0	2	k__Bacteria; p__Bacteroidetes; c__Bacteroidia; o__Bacteroidales; f__Marinifilaceae; g__Odoribacter; s__Odoribacter_splanchnicus_DSM_20712
OTU914	0	0	0	0	0	0	0	0	0	0	0	0	0	0	0	0	0	0	0	0	0	0	0	0	0	0	0	0	0	3	k__Bacteria; p__Actinobacteria; c__Actinobacteria; o__Bifidobacteriales; f__Bifidobacteriaceae; g__Bifidobacterium; s__Bifidobacterium_bifidum
OTU915	0	0	0	0	0	0	0	0	0	0	0	0	0	0	0	0	0	0	0	0	0	0	0	0	0	0	0	0	0	4	k__Bacteria; p__Actinobacteria; c__Actinobacteria; o__Propionibacteriales; f__Propionibacteriaceae; g__unclassified_f__Propionibacteriaceae; s__unclassified_f__Propionibacteriaceae
OTU916	0	0	0	0	0	0	0	0	14	0	0	0	0	1	0	0	0	0	273	0	0	0	0	0	291	0	0	0	1	195	k__Bacteria; p__Actinobacteria; c__Actinobacteria; o__Pseudonocardiales; f__Pseudonocardiaceae; g__Actinophytocola; s__uncultured_bacterium_g__Actinophytocola
OTU917	7	0	28	3	0	5	1	3	2	0	0	0	6	0	0	7	0	0	2	5	0	0	0	0	8	0	10	1	1	2	k__Bacteria; p__Proteobacteria; c__Alphaproteobacteria; o__Rhizobiales; f__Rhizobiaceae; g__Ochrobactrum; s__uncultured_organism_g__Ochrobactrum
OTU918	0	0	0	0	0	0	0	0	0	0	0	0	0	0	0	0	0	0	0	0	0	0	0	0	0	0	0	0	0	2	k__Bacteria; p__Bacteroidetes; c__Bacteroidia; o__Cytophagales; f__Cytophagaceae; g__Rhodocytophaga; s__uncultured_Bacteroidetes_bacterium_g__Rhodocytophaga
OTU919	0	0	0	0	0	0	0	0	0	0	0	0	0	0	0	0	0	0	0	0	0	0	0	0	0	0	0	0	0	5	k__Bacteria; p__Proteobacteria; c__Alphaproteobacteria; o__Rhizobiales; f__Beijerinckiaceae; g__Psychroglaciecola; s__uncultured_bacterium_g__Psychroglaciecola
OTU920	1	2	6	0	0	0	0	2	0	0	0	0	0	0	0	6	8	0	6	34	0	0	8	3	30	0	1934	0	63	11	k__Bacteria; p__Actinobacteria; c__Actinobacteria; o__Streptomycetales; f__Streptomycetaceae; g__Streptomyces; s__unclassified_g__Streptomyces
OTU921	14	78	64	106	83	89	87	143	89	83	107	24	383	14	87	84	53	35	9	34	3	0	5	6	21	0	44	0	10	21	k__Bacteria; p__Proteobacteria; c__Deltaproteobacteria; o__Bdellovibrionales; f__Bdellovibrionaceae; g__Bdellovibrio; s__Bdellovibrio_bacteriovorus
OTU922	0	0	0	0	0	0	0	0	0	0	0	0	0	0	0	0	0	0	0	0	0	0	0	0	0	0	1	0	1	2	k__Bacteria; p__Actinobacteria; c__Actinobacteria; o__Micromonosporales; f__Micromonosporaceae; g__unclassified_f__Micromonosporaceae; s__unclassified_f__Micromonosporaceae
OTU924	0	0	0	0	0	0	0	0	0	0	0	0	0	0	0	0	0	0	0	0	0	0	0	0	0	0	0	0	0	4	k__Bacteria; p__Proteobacteria; c__Deltaproteobacteria; o__Desulfovibrionales; f__Desulfovibrionaceae; g__Bilophila; s__Bilophila_wadsworthia
OTU925	7	50	60	69	59	47	65	48	42	42	35	15	30	11	44	43	54	7	8	23	2	8	6	11	25	1	21	14	12	3	k__Bacteria; p__Proteobacteria; c__Alphaproteobacteria; o__Sphingomonadales; f__Sphingomonadaceae; g__Sphingomonas; s__Sphingomonas_koreensis
OTU926	0	0	0	0	0	0	0	0	0	0	0	0	0	0	0	0	0	0	0	0	0	0	0	0	0	0	0	0	0	1	k__Bacteria; p__Firmicutes; c__Clostridia; o__Clostridiales; f__Lachnospiraceae; g__Eubacterium]_ventriosum_group; s__uncultured_organism_g__Eubacterium]_ventriosum_group
OTU927	0	0	0	2	6	8	0	0	0	0	0	0	0	0	2	4	5	0	0	0	0	0	0	0	0	0	0	0	2	0	k__Bacteria; p__Proteobacteria; c__Deltaproteobacteria; o__Bdellovibrionales; f__Bdellovibrionaceae; g__Bdellovibrio; s__Bdellovibrionales_bacterium_Ga0074137
OTU928	0	0	0	0	0	0	0	0	0	0	0	0	0	0	0	24	4	14	1	0	12	1	29	7	4	2	78	438	35	3	k__Bacteria; p__Proteobacteria; c__Alphaproteobacteria; o__Rhizobiales; f__Xanthobacteraceae; g__Bradyrhizobium; s__unclassified_g__Bradyrhizobium
OTU929	1	2	0	0	0	5	0	0	0	17	0	0	0	0	0	15	0	0	0	1	0	0	0	0	0	0	0	1	0	1	k__Bacteria; p__Actinobacteria; c__Actinobacteria; o__Corynebacteriales; f__Corynebacteriaceae; g__Corynebacterium_1; s__Corynebacterium_tuberculostearicum
OTU930	0	0	0	0	0	0	0	0	0	0	0	0	0	0	0	0	0	0	0	0	0	0	0	0	0	0	0	0	0	1	k__Bacteria; p__Firmicutes; c__Bacilli; o__Bacillales; f__Paenibacillaceae; g__Cohnella; s__uncultured_bacterium_g__Cohnella
OTU931	0	2	7	6	0	0	12	0	5	3	1	1	13	0	0	0	6	2	0	6	0	0	0	1	3	0	2	0	1	4	k__Bacteria; p__Bacteroidetes; c__Bacteroidia; o__Sphingobacteriales; f__NS11-12_marine_group; g__norank_f__NS11-12_marine_group; s__unclassified_g__norank_f__NS11-12_marine_group
OTU932	0	0	0	0	0	0	0	0	0	0	0	0	0	0	0	0	0	0	0	0	0	0	0	0	0	0	0	0	0	3	k__Bacteria; p__Actinobacteria; c__Actinobacteria; o__Gaiellales; f__norank_o__Gaiellales; g__norank_o__Gaiellales; s__uncultured_bacterium_g__norank_o__Gaiellales
OTU933	0	0	0	0	0	0	0	0	0	0	0	0	0	0	0	0	0	0	0	0	0	0	0	0	0	0	0	0	0	1	k__Bacteria; p__Actinobacteria; c__Actinobacteria; o__Solirubrobacterales; f__67-14; g__norank_f__67-14; s__unclassified_g__norank_f__67-14
OTU934	0	0	0	0	0	0	0	3	1	0	0	0	0	0	2	0	1	54	13	1	0	1	4	0	19	52	122	71	194	17	k__Bacteria; p__Proteobacteria; c__Alphaproteobacteria; o__Rhizobiales; f__Xanthobacteraceae; g__Bradyrhizobium; s__Bradyrhizobium_elkanii_g__Bradyrhizobium
OTU935	0	0	0	0	0	0	0	0	0	0	0	0	0	0	0	0	0	0	0	0	0	0	0	0	0	0	0	0	0	1	k__Bacteria; p__Proteobacteria; c__Gammaproteobacteria; o__Xanthomonadales; f__Xanthomonadaceae; g__Lysobacter; s__unclassified_g__Lysobacter
OTU936	0	0	0	0	0	0	0	0	0	0	0	0	0	0	0	0	0	0	0	0	0	0	0	0	0	0	0	0	0	2	k__Bacteria; p__Gemmatimonadetes; c__Gemmatimonadetes; o__Gemmatimonadales; f__Gemmatimonadaceae; g__norank_f__Gemmatimonadaceae; s__unclassified_g__norank_f__Gemmatimonadaceae
OTU937	0	0	0	0	0	0	0	0	0	0	0	0	0	0	0	0	0	0	0	0	0	0	0	0	0	0	0	0	0	41	k__Bacteria; p__Proteobacteria; c__Gammaproteobacteria; o__Betaproteobacteriales; f__Burkholderiaceae; g__Parasutterella; s__uncultured_organism_g__Parasutterella
OTU938	0	0	0	0	0	0	0	0	0	0	0	0	0	0	0	0	0	0	0	0	0	0	0	0	0	0	0	0	0	3	k__Bacteria; p__Firmicutes; c__Bacilli; o__Bacillales; f__Bacillaceae; g__unclassified_f__Bacillaceae; s__unclassified_f__Bacillaceae
OTU939	0	0	0	0	0	0	0	0	0	0	0	0	0	0	0	0	0	0	0	0	0	0	0	0	0	0	0	0	0	1	k__Bacteria; p__Actinobacteria; c__Actinobacteria; o__unclassified_c__Actinobacteria; f__unclassified_c__Actinobacteria; g__unclassified_c__Actinobacteria; s__unclassified_c__Actinobacteria
OTU940	5	0	21	0	0	0	2	0	15	0	0	0	11	0	0	0	0	0	1	0	0	3	2	1	13	0	0	0	2	3	k__Bacteria; p__Proteobacteria; c__Alphaproteobacteria; o__Rhizobiales; f__Beijerinckiaceae; g__Methylobacterium; s__unclassified_g__Methylobacterium
OTU941	0	0	0	0	0	0	0	0	0	0	0	0	0	0	0	1	0	292	0	0	0	0	177	0	66	0	172	0	180	24	k__Bacteria; p__Proteobacteria; c__Gammaproteobacteria; o__Steroidobacterales; f__Steroidobacteraceae; g__Steroidobacter; s__uncultured_bacterium_g__Steroidobacter
OTU942	0	0	0	0	0	0	0	0	0	0	0	0	0	0	0	0	0	0	0	0	0	0	0	0	0	0	0	0	0	1	k__Bacteria; p__Acidobacteria; c__Acidobacteriia; o__Solibacterales; f__Solibacteraceae_Subgroup_3; g__Bryobacter; s__uncultured_bacterium_g__Bryobacter
OTU943	0	0	4	0	0	0	0	0	0	0	0	0	0	0	0	0	0	0	0	0	0	0	0	0	1	0	0	0	0	3	k__Bacteria; p__Proteobacteria; c__Alphaproteobacteria; o__Rhizobiales; f__Beijerinckiaceae; g__Microvirga; s__unclassified_g__Microvirga
OTU944	0	0	0	0	0	0	0	0	0	0	0	0	0	0	0	0	0	0	0	0	0	0	0	0	0	0	0	0	0	1	k__Bacteria; p__Firmicutes; c__Clostridia; o__Clostridiales; f__Lachnospiraceae; g__Lachnospiraceae_UCG-004; s__unclassified_g__Lachnospiraceae_UCG-004
OTU945	0	0	0	0	0	0	0	0	0	0	0	0	0	0	0	0	0	0	0	0	0	0	0	0	0	0	0	0	0	5	k__Bacteria; p__Gemmatimonadetes; c__Gemmatimonadetes; o__Gemmatimonadales; f__Gemmatimonadaceae; g__Gemmatimonas; s__unclassified_g__Gemmatimonas
OTU946	0	0	0	0	0	0	0	0	0	0	0	0	0	0	0	0	0	0	0	0	0	0	0	0	0	0	0	0	0	40	k__Bacteria; p__Actinobacteria; c__Actinobacteria; o__Rubrobacterales; f__Rubrobacteriaceae; g__Rubrobacter; s__unclassified_g__Rubrobacter
OTU947	1	0	5	0	0	0	0	0	0	0	0	0	0	0	0	0	0	0	0	0	0	0	0	0	1	0	0	0	0	4	k__Bacteria; p__Actinobacteria; c__Actinobacteria; o__Frankiales; f__norank_o__Frankiales; g__norank_o__Frankiales; s__uncultured_Micrococcineae_bacterium_g__norank
OTU948	5	14	4	10	8	18	24	5	20	35	17	1	9	0	23	18	13	1	0	15	1	0	9	1	2	0	8	0	2	8	k__Bacteria; p__Proteobacteria; c__Alphaproteobacteria; o__Rhizobiales; f__Rhizobiaceae; g__unclassified_f__Rhizobiaceae; s__unclassified_f__Rhizobiaceae
OTU949	0	0	0	0	0	0	0	0	0	0	0	0	0	0	0	0	0	0	0	0	0	0	0	0	0	0	0	0	0	13	k__Bacteria; p__Actinobacteria; c__Actinobacteria; o__Solirubrobacterales; f__Solirubrobacteraceae; g__Solirubrobacter; s__uncultured_Solirubrobacter_sp._g__Solirubrobacter
OTU950	0	0	0	0	0	1	0	0	0	0	0	0	0	0	0	0	0	255	57	4	5	0	0	0	1	0	3	0	4	52	k__Bacteria; p__Actinobacteria; c__Actinobacteria; o__Pseudonocardiales; f__Pseudonocardiaceae; g__Lechevalieria; s__Lentzea_violacea_g__Lechevalieria
OTU951	0	0	0	0	0	0	0	0	0	0	0	0	0	0	0	0	0	0	0	0	0	0	0	0	0	0	0	0	0	5	k__Bacteria; p__Firmicutes; c__Clostridia; o__Clostridiales; f__Lachnospiraceae; g__Lachnoclostridium; s__metagenome_g__Lachnoclostridium
OTU953	0	0	0	0	0	0	0	0	0	0	0	0	0	0	0	0	0	0	0	0	0	0	0	0	0	0	0	0	0	6	k__Bacteria; p__Firmicutes; c__Clostridia; o__Clostridiales; f__Lachnospiraceae; g__Roseburia; s__unclassified_g__Roseburia
OTU954	14	24	39	54	50	42	26	41	27	40	18	28	74	13	28	51	75	23	2	18	1	0	3	4	13	0	14	0	8	0	k__Bacteria; p__Proteobacteria; c__Alphaproteobacteria; o__Rhodospirillales; f__norank_o__Rhodospirillales; g__norank_o__Rhodospirillales; s__metagenome_g__norank_o__Rhodospirillales
OTU955	0	0	0	0	0	0	0	0	0	0	0	0	0	0	0	0	0	0	0	0	0	0	3	0	0	0	0	0	0	2	k__Bacteria; p__Actinobacteria; c__Actinobacteria; o__Micrococcales; f__Microbacteriaceae; g__Lysinimonas; s__metagenome_g__Lysinimonas
OTU956	0	0	0	0	0	0	0	1	0	0	0	0	0	0	0	0	0	1	0	0	0	0	0	0	0	0	0	0	0	3	k__Bacteria; p__Actinobacteria; c__Actinobacteria; o__Solirubrobacterales; f__67-14; g__norank_f__67-14; s__uncultured_bacterium_g__norank_f__67-14
OTU957	0	0	0	0	0	0	0	0	0	0	0	0	0	0	0	0	0	0	0	0	0	0	0	0	0	0	0	0	0	2	k__Bacteria; p__Proteobacteria; c__Alphaproteobacteria; o__Rhizobiales; f__Beijerinckiaceae; g__Microvirga; s__unclassified_g__Microvirga
OTU958	0	0	0	0	0	0	0	0	0	0	0	0	0	0	0	0	0	0	0	0	0	0	0	0	0	0	0	0	0	3	k__Bacteria; p__Actinobacteria; c__Actinobacteria; o__Micrococcales; f__Micrococcaceae; g__Kocuria; s__unclassified_g__Kocuria
OTU959	0	7	16	13	15	7	2	15	11	12	21	0	13	4	7	11	13	4	1	5	0	0	0	0	0	0	8	1	4	1	k__Bacteria; p__Proteobacteria; c__Gammaproteobacteria; o__Alteromonadales; f__Shewanellaceae; g__Shewanella; s__unclassified_g__Shewanella
OTU960	0	2	0	0	0	0	0	0	0	0	0	0	0	0	0	0	0	0	0	1	0	0	0	0	0	0	0	0	0	1	k__Bacteria; p__Actinobacteria; c__Actinobacteria; o__Kineosporiales; f__Kineosporiaceae; g__Kineococcus; s__Kineococcus_radiotolerans_SRS30216__ATCC_BAA-149
OTU961	0	0	1	0	0	5	1	0	7	2	0	0	0	0	4	0	0	0	1	5	0	0	0	3	1	0	4	2	1	8	k__Bacteria; p__Actinobacteria; c__Actinobacteria; o__Propionibacteriales; f__Nocardioidaceae; g__Nocardioides; s__unclassified_g__Nocardioides
OTU962	0	0	0	0	0	0	0	0	0	0	0	0	0	0	0	0	0	0	4	0	0	0	0	0	3	0	0	0	0	174	k__Bacteria; p__Actinobacteria; c__Actinobacteria; o__Streptosporangiales; f__Streptosporangiaceae; g__Nonomuraea; s__Nonomuraea_kuesteri
OTU963	0	0	0	0	0	0	0	0	0	0	4	0	0	0	0	6	12	0	0	6	0	1	0	0	3	0	2	0	0	4	k__Bacteria; p__Actinobacteria; c__Actinobacteria; o__Micrococcales; f__Microbacteriaceae; g__Microbacterium; s__unclassified_g__Microbacterium
OTU964	0	0	0	0	0	0	0	0	0	0	0	0	0	0	0	0	0	0	0	0	0	0	0	0	0	0	0	0	0	18	k__Bacteria; p__Actinobacteria; c__Actinobacteria; o__Bifidobacteriales; f__Bifidobacteriaceae; g__Bifidobacterium; s__Bifidobacterium_pseudocatenulatum_DSM_20438__JCM_1200__LMG_10505
OTU965	49	329	264	293	293	200	396	550	340	405	368	53	1316	29	399	284	164	85	13	97	6	0	16	44	77	0	178	0	43	43	k__Bacteria; p__Bacteroidetes; c__Bacteroidia; o__Flavobacteriales; f__Flavobacteriaceae; g__Flavobacterium; s__unclassified_g__Flavobacterium
OTU966	0	0	0	0	0	0	0	0	0	0	0	0	0	0	0	0	0	0	0	0	0	0	0	0	0	0	0	0	0	21	k__Bacteria; p__Firmicutes; c__Clostridia; o__Clostridiales; f__Ruminococcaceae; g__Subdoligranulum; s__uncultured_organism_g__Subdoligranulum
OTU967	0	0	0	0	0	0	0	0	0	0	0	0	0	0	0	0	0	0	0	0	0	0	0	0	0	0	0	0	0	14	k__Bacteria; p__Firmicutes; c__Clostridia; o__Clostridiales; f__Lachnospiraceae; g__Dorea; s__unclassified_g__Dorea
OTU968	0	0	0	0	0	0	0	0	0	0	0	0	0	0	0	0	0	0	0	0	0	0	0	0	4	0	0	0	0	13	k__Bacteria; p__Actinobacteria; c__Actinobacteria; o__Micrococcales; f__Promicromonosporaceae; g__Promicromonospora; s__Promicromonospora_umidemergens
OTU969	0	0	1	0	1	0	0	0	14	0	0	0	0	1	0	0	1	1	1013	54	0	0	0	0	228	0	8	0	27	3841	k__Bacteria; p__Actinobacteria; c__Actinobacteria; o__Pseudonocardiales; f__Pseudonocardiaceae; g__Kibdelosporangium; s__uncultured_bacterium_g__Kibdelosporangium
OTU970	0	0	0	0	0	1	0	0	0	0	0	0	0	0	4	0	0	4	0	8	0	0	21	0	3	0	5	0	0	2	k__Bacteria; p__Bacteroidetes; c__Bacteroidia; o__Flavobacteriales; f__Weeksellaceae; g__Cloacibacterium; s__uncultured_bacterium_g__Cloacibacterium
OTU971	0	0	0	0	0	0	0	0	0	0	0	0	0	0	0	0	0	0	0	0	0	0	0	0	0	0	0	0	0	16	k__Bacteria; p__Actinobacteria; c__Actinobacteria; o__Rubrobacterales; f__Rubrobacteriaceae; g__Rubrobacter; s__metagenome_g__Rubrobacter
OTU972	0	0	0	0	0	0	0	0	0	0	0	0	0	0	0	0	0	0	0	0	0	0	0	0	0	0	0	0	0	5	k__Bacteria; p__Actinobacteria; c__Actinobacteria; o__Gaiellales; f__norank_o__Gaiellales; g__norank_o__Gaiellales; s__unclassified_g__norank_o__Gaiellales
OTU973	0	0	0	0	0	0	0	0	0	0	0	0	0	0	0	0	0	0	0	0	0	0	0	0	0	0	0	0	0	1	k__Bacteria; p__Actinobacteria; c__Actinobacteria; o__Solirubrobacterales; f__unclassified_o__Solirubrobacterales; g__unclassified_o__Solirubrobacterales; s__unclassified_o__Solirubrobacterales
OTU974	0	1	11	4	0	3	0	0	8	0	0	1	2	0	7	0	11	6	9	0	0	0	0	0	7	0	0	0	9	2	k__Bacteria; p__Firmicutes; c__Bacilli; o__Bacillales; f__Bacillaceae; g__Bacillus; s__Bacillus_thuringiensis_serovar_kurstaki_str._YBT-1520
OTU975	0	0	0	0	0	0	0	0	0	0	0	0	0	0	0	0	0	0	0	0	0	0	0	0	0	0	0	0	0	3	k__Bacteria; p__Proteobacteria; c__Deltaproteobacteria; o__Oligoflexales; f__0319-6G20; g__norank_f__0319-6G20; s__uncultured_Myxococcales_bacterium_g__norank_f__0319-6G20
OTU976	5	35	59	42	30	23	79	59	28	81	25	9	48	13	37	26	15	7	3	9	0	0	20	6	11	0	25	0	8	2	k__Bacteria; p__Proteobacteria; c__Alphaproteobacteria; o__Rhizobiales; f__Rhizobiaceae; g__Shinella; s__unclassified_g__Shinella
OTU977	0	0	0	0	0	0	0	0	0	0	0	0	0	0	0	0	0	0	0	0	0	0	0	0	0	0	0	0	0	2	k__Bacteria; p__Proteobacteria; c__Deltaproteobacteria; o__Myxococcales; f__P3OB-42; g__norank_f__P3OB-42; s__uncultured_bacterium_g__norank_f__P3OB-42
OTU978	170	523	532	759	721	756	785	634	554	682	590	149	638	116	578	409	465	128	56	248	17	3	53	92	248	1	328	1	111	37	k__Bacteria; p__Proteobacteria; c__Alphaproteobacteria; o__Caulobacterales; f__Caulobacteraceae; g__Brevundimonas; s__Brevundimonas_diminuta
OTU979	0	0	0	0	0	0	0	0	0	0	0	0	0	0	0	0	0	0	0	0	0	0	0	0	2	0	0	0	0	25	k__Bacteria; p__Actinobacteria; c__Actinobacteria; o__Solirubrobacterales; f__Solirubrobacteraceae; g__Solirubrobacter; s__uncultured_bacterium_g__Solirubrobacter
OTU980	278	1216	968	1525	1248	1179	1305	1225	900	1187	1171	400	1065	195	946	973	907	282	31	464	29	2	83	161	246	2	537	2	171	69	k__Bacteria; p__Proteobacteria; c__Gammaproteobacteria; o__Betaproteobacteriales; f__Burkholderiaceae; g__Delftia; s__unclassified_g__Delftia
OTU981	0	1	2	0	2	0	0	0	8	0	0	0	5	1	1	1	12	3	1	0	0	0	0	1	70	1	4	0	0	15	k__Bacteria; p__Proteobacteria; c__Alphaproteobacteria; o__Sphingomonadales; f__Sphingomonadaceae; g__Sphingobium; s__Sphingobium_yanoikuyae
OTU982	0	0	0	0	0	0	0	0	0	0	0	0	0	0	0	0	0	0	0	0	0	0	0	0	0	0	0	0	0	19	k__Bacteria; p__Firmicutes; c__Clostridia; o__Clostridiales; f__Ruminococcaceae; g__Faecalibacterium; s__gut_metagenome_g__Faecalibacterium
OTU983	0	0	0	0	0	0	0	0	0	0	0	0	0	0	0	0	0	0	0	0	0	0	0	0	0	0	0	0	0	11	k__Bacteria; p__Firmicutes; c__Clostridia; o__Clostridiales; f__Lachnospiraceae; g__norank_f__Lachnospiraceae; s__Clostridium_sp._AT4
OTU984	0	0	0	0	0	0	0	0	0	0	0	0	0	0	0	0	0	0	0	0	0	0	0	0	0	0	0	0	0	2	k__Bacteria; p__Actinobacteria; c__Actinobacteria; o__Frankiales; f__Acidothermaceae; g__Acidothermus; s__uncultured_bacterium_g__Acidothermus
OTU985	0	3	0	0	0	0	0	0	0	0	0	0	8	2	0	3	285	2	9	60	0	1	0	160	4	0	4	16	6	50	k__Bacteria; p__Actinobacteria; c__Actinobacteria; o__Corynebacteriales; f__Mycobacteriaceae; g__Mycobacterium; s__unclassified_g__Mycobacterium
OTU986	0	0	0	0	0	0	0	0	0	0	0	0	0	0	0	0	0	0	0	0	0	0	0	0	0	0	0	0	0	2	k__Bacteria; p__Gemmatimonadetes; c__Gemmatimonadetes; o__Gemmatimonadales; f__Gemmatimonadaceae; g__unclassified_f__Gemmatimonadaceae; s__unclassified_f__Gemmatimonadaceae
OTU987	12	24	217	28	97	259	65	41	145	78	40	13	131	17	114	470	271	204	26	227	10	11	84	102	43	14	212	84	96	31	k__Bacteria; p__Proteobacteria; c__Gammaproteobacteria; o__Pseudomonadales; f__Pseudomonadaceae; g__Pseudomonas; s__Pseudomonas_mosselii
OTU988	0	0	0	0	0	0	0	0	0	0	0	0	0	0	0	0	0	0	0	0	0	0	0	0	0	0	0	0	0	1	k__Bacteria; p__Firmicutes; c__Clostridia; o__Clostridiales; f__Ruminococcaceae; g__UBA1819; s__uncultured_organism_g__UBA1819
OTU989	0	0	0	0	0	0	0	0	0	0	0	0	0	0	0	0	0	2	0	5	0	0	0	0	1	0	0	0	0	11	k__Bacteria; p__Actinobacteria; c__Actinobacteria; o__Gaiellales; f__Gaiellaceae; g__Gaiella; s__unclassified_g__Gaiella
OTU990	0	0	0	0	0	0	0	0	0	0	0	0	0	0	0	0	0	0	0	0	0	0	0	0	0	0	0	0	0	4	k__Bacteria; p__Firmicutes; c__Clostridia; o__Clostridiales; f__Lachnospiraceae; g__Blautia; s__unclassified_g__Blautia
OTU991	0	0	0	0	0	0	0	0	0	0	0	0	0	0	0	0	0	2	0	0	0	0	0	0	0	0	0	0	0	4	k__Bacteria; p__Entotheonellaeota; c__Entotheonellia; o__Entotheonellales; f__Entotheonellaceae; g__norank_f__Entotheonellaceae; s__unclassified_g__norank_f__Entotheonellaceae
OTU992	0	0	0	0	0	0	0	0	0	0	0	0	0	0	0	0	0	0	0	0	0	0	0	0	0	0	0	0	0	3	k__Bacteria; p__Firmicutes; c__Clostridia; o__Clostridiales; f__Lachnospiraceae; g__Eubacterium]_hallii_group; s__unclassified_g__Eubacterium]_hallii_group
OTU993	33	81	72	86	108	63	97	52	61	139	121	24	63	12	161	63	79	31	29	46	0	1	14	13	35	0	37	2	9	30	k__Bacteria; p__Proteobacteria; c__Gammaproteobacteria; o__Xanthomonadales; f__Xanthomonadaceae; g__Stenotrophomonas; s__Stenotrophomonas_acidaminiphila
OTU994	0	10	0	0	0	0	0	0	0	0	0	0	0	0	0	1	0	10	1	0	0	0	48	0	3	0	0	6	0	84	k__Bacteria; p__Proteobacteria; c__Gammaproteobacteria; o__Betaproteobacteriales; f__Burkholderiaceae; g__Polaromonas; s__metagenome_g__Polaromonas
OTU995	0	2	2	7	4	4	0	1	2	4	4	3	2	0	1	5	4	0	0	3	0	0	0	0	0	0	5	0	0	0	k__Bacteria; p__Proteobacteria; c__Alphaproteobacteria; o__Micavibrionales; f__norank_o__Micavibrionales; g__norank_o__Micavibrionales; s__bacterium_enrichment_culture_clone_SRAO_28
OTU996	2	18	11	29	11	4	13	8	28	6	13	1	55	2	38	57	14	5	0	12	1	0	2	3	9	1	22	0	2	0	k__Bacteria; p__Bacteroidetes; c__Bacteroidia; o__Flavobacteriales; f__Flavobacteriaceae; g__unclassified_f__Flavobacteriaceae; s__unclassified_f__Flavobacteriaceae
OTU998	0	0	0	0	0	0	0	0	0	0	0	0	0	0	0	0	0	0	0	0	0	0	0	0	0	0	0	0	0	20	k__Bacteria; p__Firmicutes; c__Negativicutes; o__Selenomonadales; f__Veillonellaceae; g__Dialister; s__human_gut_metagenome_g__Dialister
OTU999	1	19	10	2	0	2	0	0	20	0	0	0	8	0	0	11	0	0	0	4	0	1	0	2	7	0	0	0	0	14	k__Bacteria; p__Actinobacteria; c__Actinobacteria; o__Corynebacteriales; f__Dietziaceae; g__Dietzia; s__Dietzia_maris
OTU1000	66	336	367	537	386	333	488	387	247	392	478	119	347	54	425	332	249	86	14	160	89	0	31	36	80	9	190	84	66	39	k__Bacteria; p__Proteobacteria; c__Alphaproteobacteria; o__Rhizobiales; f__Rhizobiaceae; g__Allorhizobium-Neorhizobium-Pararhizobium-Rhizobium; s__unclassified_g__Allorhizobium-Neorhizobium-Pararhizobium-Rhizobium
OTU1001	0	0	0	0	0	0	0	0	0	0	0	0	0	0	0	0	0	0	0	0	0	0	0	0	0	0	0	0	0	39	k__Bacteria; p__Bacteroidetes; c__Bacteroidia; o__Bacteroidales; f__Rikenellaceae; g__Alistipes; s__uncultured_organism_g__Alistipes
OTU1002	0	0	0	0	0	0	0	0	0	0	0	0	0	0	0	0	0	0	0	0	0	0	0	0	0	0	0	0	0	3	k__Bacteria; p__Chloroflexi; c__unclassified_p__Chloroflexi; o__unclassified_p__Chloroflexi; f__unclassified_p__Chloroflexi; g__unclassified_p__Chloroflexi; s__unclassified_p__Chloroflexi
OTU1003	2	0	0	2	1	16	4	0	6	0	14	0	3	3	17	3	4	1	0	0	0	0	0	2	4	0	10	0	0	1	k__Bacteria; p__Proteobacteria; c__Gammaproteobacteria; o__Alteromonadales; f__Alteromonadaceae; g__Rheinheimera; s__uncultured_bacterium_g__Rheinheimera
OTU1004	0	0	0	0	0	0	0	0	0	0	0	0	0	0	0	0	0	0	0	0	0	0	0	0	0	0	0	0	0	2	k__Bacteria; p__Proteobacteria; c__Deltaproteobacteria; o__Oligoflexales; f__0319-6G20; g__norank_f__0319-6G20; s__marine_metagenome_g__norank_f__0319-6G20
OTU1005	0	0	0	0	0	0	0	0	0	0	0	0	0	0	0	0	0	0	0	0	0	0	0	0	0	0	0	0	0	1	k__Bacteria; p__Proteobacteria; c__Alphaproteobacteria; o__Rhodospirillales; f__norank_o__Rhodospirillales; g__norank_o__Rhodospirillales; s__metagenome_g__norank_o__Rhodospirillales
OTU1006	0	0	0	0	0	0	0	0	0	0	0	0	0	0	0	0	0	0	0	0	0	0	0	0	0	0	0	0	0	1	k__Bacteria; p__Chloroflexi; c__TK10; o__norank_c__TK10; f__norank_c__TK10; g__norank_c__TK10; s__uncultured_bacterium_g__norank_c__TK10
OTU1007	0	2	11	0	0	0	0	0	4	0	0	1	0	0	2	0	18	3	0	25	2	0	0	37	1	0	2	12	60	14	k__Bacteria; p__Actinobacteria; c__Actinobacteria; o__Corynebacteriales; f__Mycobacteriaceae; g__Mycobacterium; s__unclassified_g__Mycobacterium
OTU1008	0	0	0	0	0	0	0	0	0	0	0	0	0	0	0	0	0	2	0	0	0	0	0	0	0	0	0	0	0	19	k__Bacteria; p__Firmicutes; c__Bacilli; o__Bacillales; f__Bacillaceae; g__Bacillus; s__unclassified_g__Bacillus
OTU1009	0	0	0	0	0	0	0	0	0	0	0	0	0	0	0	0	0	0	0	0	0	0	0	0	0	0	0	0	0	16	k__Bacteria; p__Bacteroidetes; c__Bacteroidia; o__Bacteroidales; f__Bacteroidaceae; g__Bacteroides; s__unclassified_g__Bacteroides
OTU1010	0	0	0	0	0	0	0	0	0	0	0	0	0	0	0	0	0	0	0	0	0	0	0	0	0	0	0	0	0	49	k__Bacteria; p__Bacteroidetes; c__Bacteroidia; o__Bacteroidales; f__Bacteroidaceae; g__Bacteroides; s__gut_metagenome_g__Bacteroides
OTU1011	0	0	0	0	0	0	0	0	0	0	0	0	0	0	0	0	0	0	0	0	0	0	0	0	0	0	0	0	0	2	k__Bacteria; p__Acidobacteria; c__Acidobacteriia; o__Solibacterales; f__Solibacteraceae_Subgroup_3; g__Bryobacter; s__unclassified_g__Bryobacter
OTU1012	0	0	0	0	0	0	0	0	0	0	0	0	0	0	0	0	0	0	0	0	0	0	0	0	0	0	0	0	0	10	k__Bacteria; p__Firmicutes; c__Clostridia; o__Clostridiales; f__Lachnospiraceae; g__Anaerostipes; s__unclassified_g__Anaerostipes
OTU1013	0	0	0	0	0	0	0	0	0	0	0	0	0	0	0	0	0	0	0	0	0	0	0	0	0	0	0	0	0	10	k__Bacteria; p__Proteobacteria; c__Gammaproteobacteria; o__Oceanospirillales; f__Halomonadaceae; g__Halomonas; s__Halomonas_nitritophilus
OTU1015	0	0	0	0	0	0	0	0	0	0	0	0	0	0	0	0	0	0	0	0	0	0	0	0	0	0	0	0	0	3	k__Bacteria; p__Firmicutes; c__Clostridia; o__Clostridiales; f__Lachnospiraceae; g__Agathobacter; s__Eubacterium_ramulus
OTU1016	0	0	2	0	0	0	0	0	0	0	0	0	0	0	0	0	2	99	2079	5	0	0	1	0	61	0	0	4	2	35	k__Bacteria; p__Actinobacteria; c__Actinobacteria; o__Micromonosporales; f__Micromonosporaceae; g__Actinoplanes; s__unclassified_g__Actinoplanes
OTU1017	0	0	0	0	0	0	0	0	0	0	0	0	0	0	0	0	0	0	0	0	0	0	0	0	0	0	0	0	0	2	k__Bacteria; p__Firmicutes; c__Clostridia; o__Clostridiales; f__Lachnospiraceae; g__Roseburia; s__uncultured_Roseburia_sp._g__Roseburia
OTU1018	0	0	0	0	0	0	0	0	0	0	0	0	0	0	0	0	0	0	0	0	0	0	0	0	0	0	0	0	0	1	k__Bacteria; p__Proteobacteria; c__Gammaproteobacteria; o__Oceanospirillales; f__Halomonadaceae; g__Halomonas; s__Halomonas_pantelleriensis
OTU1019	0	0	0	0	0	0	0	0	0	0	0	0	0	0	0	0	0	0	0	0	0	0	0	0	0	0	0	0	0	4	k__Bacteria; p__Firmicutes; c__Clostridia; o__Clostridiales; f__Lachnospiraceae; g__Ruminococcus]_gnavus_group; s__uncultured_organism_g__Ruminococcus]_gnavus_group
OTU1020	0	0	0	0	0	0	0	0	0	0	0	0	0	0	0	0	0	0	0	0	0	0	0	0	3	0	0	0	0	1	k__Bacteria; p__Actinobacteria; c__Actinobacteria; o__Streptomycetales; f__Streptomycetaceae; g__Streptomyces; s__unclassified_g__Streptomyces
OTU1021	1	13	11	6	10	2	16	17	8	5	6	2	49	4	8	11	11	2	3	7	0	2	3	7	16	0	10	0	3	10	k__Bacteria; p__Proteobacteria; c__Alphaproteobacteria; o__Caulobacterales; f__Caulobacteraceae; g__Brevundimonas; s__unclassified_g__Brevundimonas
OTU1022	0	0	1	0	0	1	0	0	1	0	0	0	0	0	0	73	125	0	1101	20	5	0	9	419	6	56	0	3	486	9	k__Bacteria; p__Actinobacteria; c__Actinobacteria; o__Pseudonocardiales; f__Pseudonocardiaceae; g__Amycolatopsis; s__unclassified_g__Amycolatopsis
OTU1023	0	0	0	0	0	0	0	0	0	0	0	0	0	0	0	0	0	0	0	0	0	0	0	0	0	0	0	0	0	24	k__Bacteria; p__Bacteroidetes; c__Bacteroidia; o__Bacteroidales; f__Tannerellaceae; g__Parabacteroides; s__Parabacteroides_merdae
OTU1024	0	0	0	0	0	0	0	0	0	0	0	0	0	0	2	8	1	0	0	0	0	0	0	2	0	0	0	0	0	1	k__Bacteria; p__Firmicutes; c__Bacilli; o__Lactobacillales; f__Lactobacillaceae; g__Lactobacillus; s__Lactobacillus_iners_DSM_13335
OTU1025	0	0	0	0	0	0	0	0	0	0	0	0	0	0	0	0	0	0	0	0	0	0	0	0	0	0	0	0	0	34	k__Bacteria; p__Bacteroidetes; c__Bacteroidia; o__Bacteroidales; f__Barnesiellaceae; g__Barnesiella; s__uncultured_organism_g__Barnesiella
OTU1026	0	0	0	0	0	0	0	0	0	0	0	0	0	0	0	0	0	0	0	0	0	0	0	0	0	0	0	0	0	103	k__Bacteria; p__Bacteroidetes; c__Bacteroidia; o__Bacteroidales; f__Bacteroidaceae; g__Bacteroides; s__Bacteroides_massiliensis
OTU1027	0	0	0	0	0	0	0	0	0	0	0	0	0	0	0	0	0	0	0	0	0	0	0	0	0	0	0	0	0	170	k__Bacteria; p__Bacteroidetes; c__Bacteroidia; o__Bacteroidales; f__Bacteroidaceae; g__Bacteroides; s__Bacteroides_dorei
OTU1028	0	0	0	0	0	0	0	0	0	0	0	0	0	0	0	0	0	0	0	0	0	0	0	0	0	0	0	0	0	1	k__Bacteria; p__Actinobacteria; c__Actinobacteria; o__Kineosporiales; f__Kineosporiaceae; g__unclassified_f__Kineosporiaceae; s__unclassified_f__Kineosporiaceae
OTU1029	2	4	20	0	0	5	0	14	3	0	0	2	0	1	29	50	2	13	0	45	1	0	2	8	2	0	98	0	407	154	k__Bacteria; p__Proteobacteria; c__Gammaproteobacteria; o__Enterobacteriales; f__Enterobacteriaceae; g__Escherichia-Shigella; s__unclassified_g__Escherichia-Shigella
OTU1031	48	230	236	384	237	264	284	209	237	304	248	56	339	49	221	314	172	53	58	147	12	5	153	30	44	0	124	1	50	20	k__Bacteria; p__Proteobacteria; c__Alphaproteobacteria; o__Rhizobiales; f__Rhizobiaceae; g__Allorhizobium-Neorhizobium-Pararhizobium-Rhizobium; s__Agrobacterium_radiobacter_g__Allorhizobium-Neorhizobium-Pararhizobium-Rhizobium
OTU1032	1	5	0	0	3	0	3	0	14	3	0	0	0	0	3	3	3	0	107	1	0	0	0	2	1	0	6	1	1	8	k__Bacteria; p__Actinobacteria; c__Actinobacteria; o__Micrococcales; f__Microbacteriaceae; g__Microbacterium; s__Microbacterium_oxydans_g__Microbacterium
OTU1034	0	0	0	0	0	0	0	0	0	0	0	0	0	0	0	0	0	0	0	0	0	0	0	0	0	0	0	0	0	5	k__Bacteria; p__Actinobacteria; c__Actinobacteria; o__Propionibacteriales; f__Nocardioidaceae; g__Actinopolymorpha; s__metagenome_g__Actinopolymorpha
OTU1035	0	0	0	0	0	0	0	0	0	0	0	0	0	0	0	0	0	0	0	0	0	0	0	0	0	0	0	0	0	2	k__Bacteria; p__Proteobacteria; c__Alphaproteobacteria; o__norank_c__Alphaproteobacteria; f__norank_c__Alphaproteobacteria; g__norank_c__Alphaproteobacteria; s__uncultured_Acetobacteraceae_bacterium_g__norank_c__Alphaproteobacteria
OTU1036	0	0	0	0	0	0	0	0	0	0	0	0	0	0	0	0	0	0	0	0	0	0	0	0	0	0	0	0	0	2	k__Bacteria; p__Proteobacteria; c__Deltaproteobacteria; o__Myxococcales; f__Haliangiaceae; g__Haliangium; s__uncultured_Myxococcales_bacterium_g__Haliangium
OTU1037	54	175	285	180	322	262	220	258	266	220	269	77	314	38	313	214	176	53	3	101	3	0	14	20	42	0	69	0	22	20	k__Bacteria; p__Proteobacteria; c__Alphaproteobacteria; o__Rhodospirillales; f__norank_o__Rhodospirillales; g__norank_o__Rhodospirillales; s__uncultured_soil_bacterium_g__norank_o__Rhodospirillales
OTU1039	0	0	0	0	0	0	0	0	0	0	0	0	0	0	0	0	0	0	0	0	0	0	0	0	0	0	0	0	0	6	k__Bacteria; p__Firmicutes; c__Clostridia; o__Clostridiales; f__Ruminococcaceae; g__Oscillibacter; s__uncultured_organism_g__Oscillibacter
OTU1040	0	0	0	0	0	0	0	0	0	0	0	0	0	0	0	0	0	0	0	0	0	0	0	0	0	0	0	0	0	7	k__Bacteria; p__Firmicutes; c__Clostridia; o__Clostridiales; f__Ruminococcaceae; g__Ruminococcaceae_NK4A214_group; s__metagenome_g__Ruminococcaceae_NK4A214_group
