# Supplementary material for: Niche Specialization and Functional Overlap of Bamboo Leaf and Root Microbiota
Source: Front Microbiol. 2020 Sep 18;11:571159. doi: 10.3389/fmicb.2020.571159 (PMC7531387; doi:10.3389/fmicb.2020.571159)
Supplement: TABLE S4 — Significantly different pathways at KEGG functional category 2 and 3 level between leaf and root microbiomes with statistical significance estimated in STAMP. [file Table_4.XLSX]

## Sheet: Table S4
Table S4 Significantly different pathways at KEGG functional category 2 and 3 level between leaf and root microbiomes with statistical significance estimated in STAMP.
	Predicted pathways	Leaf: mean rel. freq. (%)	Leaf: std. dev. (%)	Root: mean rel. freq. (%)	Root: std. dev. (%)	p-values	p-values (corrected)	Difference between means	95.0% lower CI	95.0% upper CI	FBF	FBF: parent seq. count	FBF: rel. freq. (%)	FBM	FBM: parent seq. count	FBM: rel. freq. (%)	FCM	FCM: parent seq. count	FCM: rel. freq. (%)	FDS	FDS: parent seq. count	FDS: rel. freq. (%)	FHT	FHT: parent seq. count	FHT: rel. freq. (%)	FIG	FIG: parent seq. count	FIG: rel. freq. (%)	FMA	FMA: parent seq. count	FMA: rel. freq. (%)	FOL	FOL: parent seq. count	FOL: rel. freq. (%)	FPH	FPH: parent seq. count	FPH: rel. freq. (%)	FPP	FPP: parent seq. count	FPP: rel. freq. (%)	FSA	FSA: parent seq. count	FSA: rel. freq. (%)	FSG	FSG: parent seq. count	FSG: rel. freq. (%)	FSK	FSK: parent seq. count	FSK: rel. freq. (%)
CategoryL2	Cell Growth and Death	0.623219	0.0154431	0.46726	0.090155	1.31e-05	0.000418987	0.155959	0.103799	0.208119	16203	2501445	0.647746	55387	9384599	0.59019	61091	9735441	0.627511	64191	10084318	0.636543	63502	10058780	0.631309	64459	10216029	0.630959	62971	9910908	0.635371	61855	9807678	0.630679	60657	10152474	0.59746	61308	9726453	0.630322	61490	9894468	0.621458	14837	2465233	0.60185	59402	9380374	0.633258
	Environmental Adaptation	0.174592	0.00304644	0.128891	0.0232468	3.24e-06	0.000103786	0.0457013	0.0323036	0.0590989	4425	2501445	0.176898	15841	9384599	0.168798	16790	9735441	0.172463	18135	10084318	0.179834	17850	10058780	0.177457	17941	10216029	0.175616	17480	9910908	0.176371	17264	9807678	0.176025	17212	10152474	0.169535	17085	9726453	0.175655	17485	9894468	0.176715	4355	2465233	0.176657	16148	9380374	0.172147
	Metabolism	2.46145	0.0246346	2.72374	0.104897	1.26e-07	4.04e-06	-0.262292	-0.323488	-0.201096	60279	2501445	2.40977	235311	9384599	2.50742	240078	9735441	2.46602	247159	10084318	2.45092	244962	10058780	2.43531	249776	10216029	2.44494	245600	9910908	2.47808	242734	9807678	2.47494	249702	10152474	2.45952	237485	9726453	2.44164	243659	9894468	2.46258	60620	2465233	2.459	233005	9380374	2.48396
CategoryL3	Phenylalanine, tyrosine and tryptophan biosynthesis	0.67821	0.0101664	0.610478	0.0469069	8.63592e-05	0.0196899	0.0677322	0.0404396	0.0950248	16665	2482948	0.671178	62591	9314774	0.671954	66034	9663886	0.683307	67247	10008729	0.671884	68444	9982914	0.685611	67542	10139377	0.666136	66393	9837062	0.674927	67325	9735174	0.691564	67318	10074886	0.668176	66264	9653972	0.686391	67159	9818255	0.684022	16755	2446188	0.684943	63873	9312225	0.685905
	Arginine and proline metabolism	1.0777	0.0167628	1.27516	0.1181	1.96101e-05	0.0044711	-0.197455	-0.265583	-0.129327	26767	2482948	1.07803	101933	9314774	1.09432	105273	9663886	1.08934	106615	10008729	1.06522	106816	9982914	1.06999	108885	10139377	1.07388	105931	9837062	1.07686	103800	9735174	1.06624	113804	10074886	1.12958	103076	9653972	1.06771	104061	9818255	1.05987	26081	2446188	1.06619	100489	9312225	1.07911
	Atrazine degradation	0.0592278	0.00228125	0.0962615	0.0272213	0.000162922	0.0371461	-0.0370337	-0.0526718	-0.0213956	1446	2482948	0.0582372	5954	9314774	0.06392	5741	9663886	0.0594067	5751	10008729	0.0574598	5747	9982914	0.0575684	6170	10139377	0.0608519	5641	9837062	0.0573444	5454	9735174	0.0560237	6470	10074886	0.0642191	5616	9653972	0.0581729	5676	9818255	0.0578107	1419	2446188	0.0580086	5604	9312225	0.060179
	Betalain biosynthesis	0.000451149	0.000371638	0.00729622	0.00512918	0.000195599	0.0445965	-0.00684507	-0.00979004	-0.00390009	16	2482948	0.000644395	155	9314774	0.00166402	53	9663886	0.000548434	22	10008729	0.000219808	23	9982914	0.000230394	37	10139377	0.000364914	40	9837062	0.000406625	14	9735174	0.000143808	68	10074886	0.000674946	20	9653972	0.000207169	14	9818255	0.000142592	6	2446188	0.00024528	52	9312225	0.000558406
	Bisphenol degradation	0.103847	0.0105851	0.229852	0.0871847	8.97154e-05	0.0204551	-0.126005	-0.176213	-0.0757973	2480	2482948	0.0998813	11378	9314774	0.12215	9874	9663886	0.102174	9648	10008729	0.0963959	9923	9982914	0.0993998	10304	10139377	0.101624	9625	9837062	0.0978443	9143	9735174	0.0939172	13529	10074886	0.134284	9367	9653972	0.0970274	9538	9818255	0.0971456	2541	2446188	0.103876	10401	9312225	0.111692
	Cell cycle - Caulobacter	0.537836	0.0137758	0.40159	0.0783394	1.22696e-05	0.00279746	0.136246	0.0908989	0.181593	13831	2482948	0.557039	47851	9314774	0.513711	52189	9663886	0.540042	55411	10008729	0.553627	54282	9982914	0.543749	55007	10139377	0.542509	54403	9837062	0.553041	53358	9735174	0.548095	51653	10074886	0.512691	52670	9653972	0.545579	52623	9818255	0.535971	12667	2446188	0.517826	50589	9312225	0.543254
	Cellular antigens	0.113424	0.00329779	0.0841992	0.0136389	9.07082e-07	0.000206815	0.0292245	0.0212591	0.0371898	2833	2482948	0.114098	10758	9314774	0.115494	10794	9663886	0.111694	11581	10008729	0.115709	11448	9982914	0.114676	11469	10139377	0.113113	11353	9837062	0.11541	11365	9735174	0.116742	10700	10074886	0.106205	11273	9653972	0.116771	11416	9818255	0.116273	2673	2446188	0.109272	10523	9312225	0.113002
	Chlorocyclohexane and chlorobenzene degradation	0.101519	0.00367604	0.168848	0.0439537	5.09437e-05	0.0116152	-0.0673292	-0.0925795	-0.0420788	2654	2482948	0.106889	9339	9314774	0.10026	9568	9663886	0.0990078	10188	10008729	0.101791	10116	9982914	0.101333	10762	10139377	0.106141	9439	9837062	0.0959534	9079	9735174	0.0932598	10502	10074886	0.104239	9636	9653972	0.0998138	9869	9818255	0.100517	2522	2446188	0.103099	9684	9312225	0.103992
	D-Glutamine and D-glutamate metabolism	0.115154	0.00190517	0.102498	0.00829642	4.84376e-05	0.0110438	0.012656	0.00781977	0.0174922	2826	2482948	0.113816	10818	9314774	0.116138	11361	9663886	0.117561	11589	10008729	0.115789	11528	9982914	0.115477	11545	10139377	0.113863	11359	9837062	0.115471	11587	9735174	0.119022	11561	10074886	0.114751	11221	9653972	0.116232	11396	9818255	0.11607	2742	2446188	0.112093	10569	9312225	0.113496
	Flavonoid biosynthesis	0.00634149	0.00170905	0.0190646	0.00836417	5.08185e-05	0.0115866	-0.0127231	-0.0175815	-0.0078646	146	2482948	0.00588011	803	9314774	0.00862071	693	9663886	0.00717103	576	10008729	0.00575498	522	9982914	0.00522893	518	10139377	0.0051088	581	9837062	0.00590624	586	9735174	0.00601941	1181	10074886	0.0117222	462	9653972	0.00478559	575	9818255	0.00585644	162	2446188	0.00662255	559	9312225	0.00600286
	Others	0.917089	0.0224621	1.01705	0.0645307	3.83544e-05	0.00874481	-0.0999656	-0.138436	-0.0614952	22008	2482948	0.886366	90181	9314774	0.96815	89724	9663886	0.928446	91243	10008729	0.911634	89870	9982914	0.900238	90606	10139377	0.893605	90912	9837062	0.924178	91296	9735174	0.937795	94495	10074886	0.937926	88791	9653972	0.919735	90047	9818255	0.917139	21512	2446188	0.879409	87250	9312225	0.93694
	p53 signaling pathway	0.0275552	0.00170237	0.0137952	0.0092922	6.8039e-05	0.0155129	0.01376	0.00837664	0.0191434	740	2482948	0.0298033	2141	9314774	0.022985	2723	9663886	0.0281771	2699	10008729	0.0269665	2982	9982914	0.029871	2938	10139377	0.0289761	2598	9837062	0.0264103	2661	9735174	0.0273339	2567	10074886	0.0254792	2697	9653972	0.0279367	2649	9818255	0.0269804	657	2446188	0.0268581	2663	9312225	0.0285968
	Pentose phosphate pathway	0.524482	0.0132133	0.615025	0.0549672	2.08276e-05	0.0047487	-0.0905425	-0.122637	-0.0584479	12992	2482948	0.523249	49371	9314774	0.530029	50777	9663886	0.52543	51206	10008729	0.511613	52108	9982914	0.521972	52173	10139377	0.514558	51524	9837062	0.523774	50292	9735174	0.516601	56863	10074886	0.564403	50139	9653972	0.519361	50181	9818255	0.511099	12602	2446188	0.515169	49128	9312225	0.527565
	Peptidoglycan biosynthesis	0.591515	0.00809406	0.530043	0.0453623	0.000164494	0.0375046	0.0614719	0.0352062	0.0877377	14493	2482948	0.583701	54875	9314774	0.589118	57567	9663886	0.595692	58665	10008729	0.586138	59485	9982914	0.595868	58924	10139377	0.58114	58384	9837062	0.593511	58785	9735174	0.603841	59303	10074886	0.588622	57697	9653972	0.59765	58542	9818255	0.596257	14491	2446188	0.592391	55499	9312225	0.59598
	Photosynthesis	0.240659	0.00520884	0.210033	0.0222154	0.00013664	0.031154	0.0306268	0.0176673	0.0435862	5895	2482948	0.237419	22101	9314774	0.237268	23668	9663886	0.244912	23702	10008729	0.236813	24235	9982914	0.242765	23727	10139377	0.234008	23764	9837062	0.241576	24114	9735174	0.2477	24676	10074886	0.244926	23626	9653972	0.244728	23703	9818255	0.241418	5807	2446188	0.23739	22873	9312225	0.245623
	Secondary bile acid biosynthesis	0.014247	0.00125927	0.00454219	0.00385274	7.72262e-08	1.76076e-05	0.00970478	0.0074188	0.0119908	325	2482948	0.0130893	1434	9314774	0.0153949	1371	9663886	0.0141868	1586	10008729	0.0158462	1462	9982914	0.014645	1393	10139377	0.0137385	1376	9837062	0.0139879	1512	9735174	0.0155313	1188	10074886	0.0117917	1507	9653972	0.0156102	1522	9818255	0.0155017	324	2446188	0.0132451	1290	9312225	0.0138528
	Starch and sucrose metabolism	0.333431	0.0212436	0.461625	0.0834523	4.41858e-05	0.0100744	-0.128194	-0.177032	-0.0793566	8418	2482948	0.339032	32997	9314774	0.354244	32218	9663886	0.333386	32096	10008729	0.32068	32066	9982914	0.321209	32347	10139377	0.319024	33263	9837062	0.33814	31606	9735174	0.324658	39155	10074886	0.38864	30788	9653972	0.318915	30701	9818255	0.312693	7670	2446188	0.313549	31162	9312225	0.334635
	Styrene degradation	0.0994293	0.00378446	0.162068	0.0417979	6.33656e-05	0.0144474	-0.062639	-0.0866601	-0.038618	2536	2482948	0.102137	9737	9314774	0.104533	9628	9663886	0.0996287	9901	10008729	0.0989236	9580	9982914	0.095964	10343	10139377	0.102008	9727	9837062	0.0988811	9354	9735174	0.0960846	10739	10074886	0.106592	9257	9653972	0.095888	9396	9818255	0.0956993	2398	2446188	0.0980301	9162	9312225	0.0983868
	Translation factors	0.374176	0.0081214	0.31929	0.039576	0.000130074	0.0296569	0.0548863	0.0318952	0.0778774	9156	2482948	0.368755	34597	9314774	0.371421	36698	9663886	0.379744	37002	10008729	0.369697	37612	9982914	0.376764	36980	10139377	0.364717	36974	9837062	0.375864	37654	9735174	0.386783	37040	10074886	0.367647	36822	9653972	0.381418	37346	9818255	0.380373	9071	2446188	0.370822	35232	9312225	0.378341
[truncated: 51 more columns]
